# Supplementary material for: Construction of protected hydroxylated pyrrolidines using nitrogen-centered radical cyclizations
Source: Royal Society of Chemistry journal article supplement (doi:10.1039/b914757h), 2009-01-01

## Supporting Information

### Construction of Protected Hydroxylated Pyrrolidines Using Nitrogen-Centered Radical Cyclizations

Huimin Zhai, Maria Zlotorzynska and Glenn M. Sammis\*

*Department of Chemistry  
University of British Columbia, Vancouver, BC V6T 1Z1, Canada*

#### Table of Contents

|                                                         |      |
|---------------------------------------------------------|------|
| <b>General Methods</b>                                  | S-2  |
| <b>Instrumentation</b>                                  | S-2  |
| <b>Synthesis of Silyl Enol Ether 7</b>                  | S-3  |
| <b>Cyclization to Form Pyrrolidine 9</b>                | S-3  |
| <b>Synthesis of 11</b>                                  | S-4  |
| <b>Synthesis of 12</b>                                  | S-5  |
| <b>Synthesis of 13</b>                                  | S-5  |
| <b>Synthesis of 16</b>                                  | S-6  |
| <b>Synthesis of 19</b>                                  | S-7  |
| <b>Synthesis of 17</b>                                  | S-7  |
| <b>Synthesis of 23</b>                                  | S-8  |
| <b>Synthesis of 24</b>                                  | S-9  |
| <b>Synthesis of 25</b>                                  | S-9  |
| <b>Synthesis of 29</b>                                  | S-10 |
| <b>Cyclization optimization for Protected<br/>CYB-3</b> | S-11 |
| <b>Fast Addition of Tributyltin Hydride to 25</b>       | S-13 |
| <b>Crude Data for the DIBAL Reduction</b>               | S-13 |
| <b>Spectra</b>                                          | S-15 |

### General Methods

All reactions were performed under a nitrogen atmosphere in flame-dried glassware. Tetrahydrofuran, diethyl ether, dichloromethane and benzene were purified by MBRAUN MB-SPS solvent purification system. Thin layer chromatography (TLC) was performed on Whatman Partisil K6F UV<sub>254</sub> pre-coated TLC plates. Chromatographic separations were effected over Fluka 60 silica gel. Triethylamine washed silica gel has been stirred with triethylamine prior to packing. All chemicals were purchased from commercial sources and used as received. Azide-containing silyl enol ethers, such as azides **7**, **13**, **16**, **19**, **20** and **25**, are bench-stable for at least 2 weeks.

### Instrumentation

A KD-Scientific KDS100 syringe pump was used for all slow additions. Melting points were performed using a Mel-Temp II apparatus (Lab devices USA) and are uncorrected. Optical rotations were recorded using a Perkin-Elmer 241 ML Polarimeter. Infrared (IR) spectra were obtained using a Thermo Nicolet 4700 FT-IR spectrometer. Proton nuclear magnetic resonance (<sup>1</sup>H NMR) spectra were recorded in deuteriochloroform using a Bruker AV-300 or AV-400 spectrometer. Carbon nuclear magnetic resonance (<sup>13</sup>C NMR) spectra were recorded in deuteriochloroform using a Bruker AV-300 or AV-400 spectrometer. Chemical shifts are reported in parts per million (ppm) and are referenced to the centerline of deuteriochloroform (7.27 ppm <sup>1</sup>H NMR; 77.0 ppm <sup>13</sup>C NMR). Low resolution mass spectra (LRMS) and high resolution mass spectra (HRMS) were recorded on either a Bruker Esquire-LC spectrometer (for LRMS) or a Waters/Micromass LCT spectrometer (for HRMS).

### Syntheses of silyl enol ether **7**

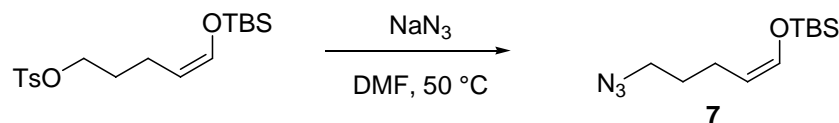

**(Z)-tert-butyl-dimethyl-silanoxy-5-azido-pent-1-ene (7):** To a solution of tosylate<sup>1</sup> (1.381 g, 3.73 mmol) in DMF (20 mL) was added sodium azide (533 mg, 7.5 mmol). The mixture was heated at 50 °C for 10 h, then taken up in EtOAc (40 mL). The mixture was then washed with water (2x15 mL), brine (15 mL), dried over Na<sub>2</sub>SO<sub>4</sub>, filtrated and concentrated by rotary evaporation to provide a yellow oil. Purification by flash chromatography (hexanes) gave 749 mg (83%) of azide **7** (Z/E = 88:12)<sup>2</sup> as a clear oil. IR (neat) 2931, 2859, 2097, 1656, 1259 cm<sup>-1</sup>; <sup>1</sup>H NMR (400 MHz, CDCl<sub>3</sub>) δ 6.27 (d, *J* = 12.0 Hz, *trans* 1 H), 6.23 (d, *J* = 5.2 Hz, *cis* 1 H), 4.98-4.89 (m, *trans* 1 H), 4.43 (q, *J* = 6.4 Hz, *cis* 1 H), 3.27 (t, *J* = 6.8 Hz, 1 H), 2.17 (q, *J* = 7.2 Hz, 2 H), 1.70-1.58 (m, 2 H), 0.94 (s, 9 H), 0.14 (s, 6 H); <sup>13</sup>C NMR (100 MHz, CDCl<sub>3</sub>) δ 139.6, 108.4, 51.0, 28.8, 25.6, 20.8, 18.2, -5.4; HRMS-ESI (*m/z*) [M+Na]<sup>+</sup> calcd for C<sub>11</sub>H<sub>23</sub>N<sub>3</sub>ONaSi: 264.1508. Found: 264.1514.

### Cyclization to form pyrrolidine **9**

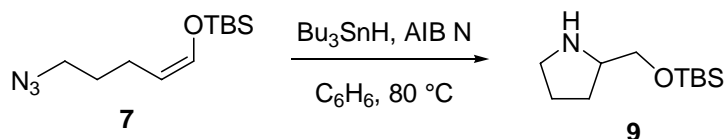

**2-(tert-Butyl-dimethyl-silanyloxymethyl)-pyrrolidine (9):** A solution of silyl enol ether **7** (301 mg, 1.27 mmol) Bu<sub>3</sub>SnH (438 mg, 1.5 mmol), AIBN (27 mg, 0.15 mmol) in degassed benzene<sup>3</sup> (40 mL) was heated to 80 °C and stirred for 10 h, and the solution was allowed to cool to room temperature and the solvent was removed by rotary evaporation. Purification by flash chromatography (1% methanol in EtOAc) afforded 206 mg (75%) of pyrrolidine **9** as a yellow oil. IR (neat) 3354, 2954, 2857, 1652, 1418 cm<sup>-1</sup>; <sup>1</sup>H NMR (400 MHz, CDCl<sub>3</sub>) δ 3.56 (dd, *J* = 10.0, 4.8 Hz, 1 H), 3.49 (dd, *J* = 10.0, 5.6 Hz, 1 H), 3.19-3.08 (m, 1 H), 2.96 (dt, *J* = 10.0, 6.4 Hz, 1 H), 2.81 (dt, *J* = 10.0, 7.2 Hz, 1 H), 2.57 (s, br, 1 H), 1.79-1.49 (m, 3 H), 1.56-1.46 (m, 1 H), 0.86 (s, 9 H), 0.02 (s, 6 H); <sup>13</sup>C NMR (100 MHz, CDCl<sub>3</sub>) δ 65.6, 59.9, 46.4, 27.4, 25.8, 25.3, 18.2, -5.5; HRMS-ESI (*m/z*): [M+Na]<sup>+</sup> calcd for C<sub>11</sub>H<sub>26</sub>NOSiNa: 216.1784. Found: 216.1785.

<sup>1</sup> Zlotorzynska, M.; Zhai, H.; Sammis, G.M. *Org. Lett.*, **2008**, *10*, 5083–5086.

<sup>2</sup> The geometry of the silyl enol ethers was assigned based on the magnitude of the *J* coupling in the <sup>1</sup>H NMR.

<sup>3</sup> Benzene is a listed carcinogen within the EEC. Appropriate ventilation and safety precautions should be taken when working with this solvent.

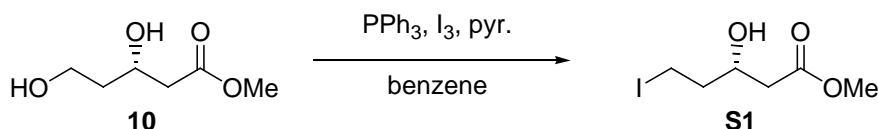

**(3R)-Methyl-3-hydroxy-5-iodopentanoate (S1):** A solution of (3S)-3,5-dihydroxy-pentanoic acid methyl ester (**10**)<sup>4</sup> (6.31 g, 42.6 mmol), triphenylphosphine (17.37 g, 64.5 mmol), pyridine (10.20 g, 129.0 mmol), and iodine (10.91 g, 43.0 mmol) in benzene (500 mL) was stirred for 18 h at room temperature. The reaction mixture was then filtered through a pad of Celite. The filtrate was concentrated by rotary evaporation to provide a light yellow oil. Purification by flash chromatography (20% EtOAc in hexanes) afforded 8.42 g (76%) of iodide **S1** as a colorless oil.  $[\alpha]_{24}^D = -14.9^\circ$  ( $c = 0.7$ ,  $\text{CH}_2\text{Cl}_2$ ); IR (neat) 3434, 2950, 1730, 1436  $\text{cm}^{-1}$ ;  $^1\text{H}$  NMR (400 MHz,  $\text{CDCl}_3$ )  $\delta$  4.11-4.01 (m, 1 H), 3.65 (s, 3 H), 3.32 (d,  $J = 4.4$  Hz, 1 H), 3.24 (t,  $J = 6.4$  Hz, 2 H), 2.50-2.38 (m, 2 H), 1.98-1.82 (m, 2 H);  $^{13}\text{C}$  NMR (100 MHz,  $\text{CDCl}_3$ )  $\delta$  172.5, 67.5, 51.7, 40.6, 39.7, 2.0. HRMS-ESI ( $m/z$ ):  $[\text{M}+\text{Na}]^+$  calcd for  $\text{C}_6\text{H}_{11}\text{O}_3\text{INa}$ : 280.9651. Found: 280.9657.

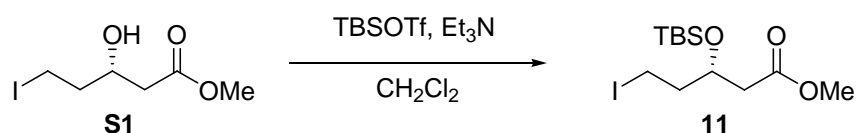

**(3R)-Methyl-(tert-Butyl-dimethyl-silanyloxy)-5-iodo-pentanoate (11):** A solution of alcohol **S1** (1.49 g, 5.8 mmol) and triethylamine (1.17 g, 11.6 mmol) in  $\text{CH}_2\text{Cl}_2$  (50 mL) was cooled to  $0^\circ\text{C}$  and *tert*-butyldimethylsilyl trifluoromethanesulfonate (2.30 g, 8.7 mmol) was added dropwise over 3 min. The resulting solution was stirred for 45 min and then washed with saturated  $\text{NaHCO}_3$  solution (40 mL). The layers were separated the aqueous layer was extracted with  $\text{CH}_2\text{Cl}_2$  (30 mL). The combined organic layers were dried over anhydrous  $\text{Na}_2\text{SO}_4$ , filtered and concentrated by rotary evaporation to provide a yellow oil. Purification by flash chromatography (10% EtOAc in petroleum ether) afforded 2.04 g of silyl ether **11** (94 %) as a colorless oil.  $[\alpha]_{24}^D = -18.9^\circ$  ( $c = 2.6$ ,  $\text{CH}_2\text{Cl}_2$ ); (neat) 2952, 2929, 2856, 1738, 1436  $\text{cm}^{-1}$ ;  $^1\text{H}$  NMR (400 MHz,  $\text{CDCl}_3$ )  $\delta$  4.18 (quint,  $J = 5.8$  Hz, 1H), 3.69 (s, 3H), 3.11-3.28 (m, 2H), 2.31-2.58 (m, 2H), 1.90-2.13 (m, 2H), 0.88 (s, 9H), 0.12 (s, 3H), 0.08 (s, 3H);  $^{13}\text{C}$  NMR (100 MHz,  $\text{CDCl}_3$ )  $\delta$  171.3, 69.3, 51.6, 42.0, 41.3, 25.7, 17.9, 1.4, -4.5, -4.7; MS-Cl ( $m/z$ ):  $[\text{M}+\text{H}]^+$  calcd for  $\text{C}_{12}\text{H}_{26}\text{IO}_3\text{Si}$ : 373.3. Found: 373.2.

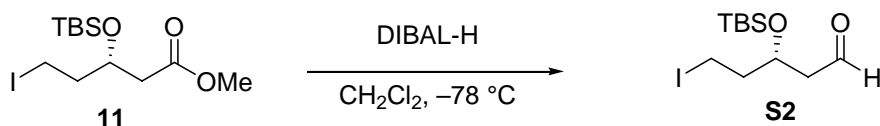

**(3R)-(tert-Butyl-dimethyl-silanyloxy)-5-iodo-pentanal (S2):** Ester **11** (1.98 g, 5.3 mmol) was dissolved in  $\text{CH}_2\text{Cl}_2$  (27 mL), cooled to  $-78^\circ\text{C}$ , and DIBAL-H (1.0 M in hexanes, 10.7 mL) was added in one portion. The solution was stirred for 30 min, then quenched with 20 mL 1:1 MeOH: $\text{H}_2\text{O}$ . The resulting solution was warmed to ambient temperature and stirred for 15 min. The mixture was then filtered through anhydrous  $\text{MgSO}_4$  and the solids were rinsed with EtOAc (70 mL). The filtrate was concentrated by rotary evaporation to provide the crude aldehyde as a colorless oil. Purification by flash chromatography (15% EtOAc in petroleum ether) afforded

<sup>4</sup> Loubinoux, B.; Sinnes, J. L.; O'Sullivan, A. C.; Winkler, T. *Tetrahedron* **1995**, *51*, 3549-58.

1.55 g of aldehyde **S2** (86 %) as a colorless oil.  $[\alpha]_{24}^D = -20.6^\circ$  ( $c = 10.8$ ,  $\text{CH}_2\text{Cl}_2$ ); IR (neat) 2953, 2928, 2887, 2856, 1724, 1471  $\text{cm}^{-1}$ ;  $^1\text{H}$  NMR (400 MHz,  $\text{CDCl}_3$ )  $\delta$  9.80 (t,  $J = 2.4$  Hz, 1H), 4.28 (quint,  $J = 5.5$  Hz, 1H), 3.18 (t,  $J = 7.1$  Hz, 2H), 2.49 - 2.64 (m, 2H), 1.92 - 2.16 (m, 2H), 0.88 (s, 9H), 0.13 (s, 3H), 0.10 (s, 3H);  $^{13}\text{C}$  NMR (100 MHz,  $\text{CDCl}_3$ )  $\delta$  201.0, 68.0, 50.4, 41.3, 25.7, 17.9, 1.4, 1.3, -4.4, -4.6, -4.6; MS-ESI ( $m/z$ ):  $[\text{M}+\text{H}]^+$  calcd for  $\text{C}_{11}\text{H}_{24}\text{IO}_2\text{Si}$ : 343.1. Found: 343.2.

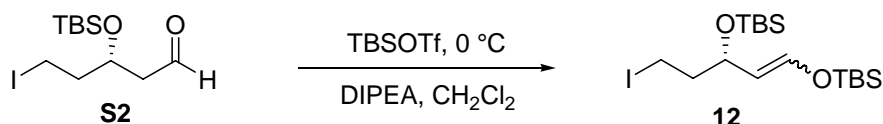

**(3R)-Bis-(tert-butyl-dimethyl-silanyloxy)-5-iodo-pent-1-ene (12):** A solution of alcohol **S2** (500 mg, 1.56 mmol) and DIPEA (377 mg, 2.92 mmol) in  $\text{CH}_2\text{Cl}_2$  (8.0 mL) was cooled to 0 °C and *tert*-butyldimethylsilyl trifluoromethanesulfonate (579 mg, 2.19 mmol) was added dropwise over 2 min. The resulting solution was stirred for 2 h and then washed with saturated  $\text{NaHCO}_3$  solution (15 mL). The layers were separated the aqueous layer was extracted with  $\text{CH}_2\text{Cl}_2$  (15 mL). The combined organic layers were dried over anhydrous  $\text{Na}_2\text{SO}_4$ , filtered and concentrated by rotary evaporation to provide a yellow oil. Purification by flash chromatography (hexanes) afforded 610 mg (91 %) of silyl enol ether **12** (*E/Z* 40:60) as a colorless oil. IR (neat) 2929, 2857, 1471, 1252, 1048  $\text{cm}^{-1}$ ;  $^1\text{H}$  NMR (400 MHz,  $\text{CDCl}_3$ )  $\delta$  6.45 (d,  $J = 12.0$  Hz, *E*, 1 H), 6.19 (d,  $J = 5.6$  Hz, *Z*, 1 H), 4.99 (dd,  $J = 12.0, 8.8$  Hz, *E*, 1 H), 4.84-4.77 (m, *Z*, 1 H), 4.52 (dd,  $J = 8.8, 5.6$  Hz, *E*, 1 H), 4.20-4.12 (m, *E*, 1 H), 3.28-3.19 (m, 2 H), 2.10-1.91 (m, 2 H), 0.98 (s, 9 H), 0.96 (s, 9 H), 0.92 (s, 9 H), 0.91 (s, 9 H), 0.18 (s, 3 H), 0.14 (s, 3 H), 0.10 (s, 3 H), 0.06 (s, 3 H);  $^{13}\text{C}$  NMR (100 MHz,  $\text{CDCl}_3$ )  $\delta$  142.5, 138.7, 113.6, 113.4, 70.8, 66.1, 42.5, 42.3, 25.916, 25.877, 25.63, 25.61, 18.1, 3.4, 3.2, -4.0, -4.3, -4.6, -4.9, -5.2, -5.4.<sup>5</sup>

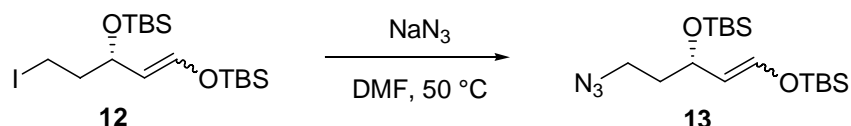

**(3R)-Bis-(tert-butyl-dimethyl-silanyloxy)-5-azido-pent-1-ene (13):** A solution of iodide **12** (457 mg, 1.0 mmol) and  $\text{NaN}_3$  (130 mg, 2.0 mmol) in DMF (8 mL) was heated to 50 °C for 1 h. The resulting yellow mixture was taken up in  $\text{Et}_2\text{O}$  (10 mL) and washed with brine (5x10 mL). The organic layer was dried over anhydrous  $\text{Na}_2\text{SO}_4$ , filtered and concentrated by rotary evaporation to provide crude azide (**13**) as a yellow oil. Purification by flash chromatography (5%  $\text{EtOAc}$  in hexanes) afforded 237 mg (64 %) of azide **13** (*E/Z* 40:60) as a yellow oil. IR (neat) 2954, 2928, 2857, 2095, 1655, 1472, 1463  $\text{cm}^{-1}$ ;  $^1\text{H}$  NMR (400 MHz,  $\text{CDCl}_3$ )  $\delta$  6.40 (d,  $J = 12.3$  Hz, *E*, 1 H), 6.15 (d,  $J = 6.2$  Hz, *Z*, 1 H), 4.81 (dd,  $J = 12.0, 8.1$  Hz, *E*, 1H), 4.49 (dd,  $J = 8.5, 6.2$  Hz, *Z*, 1H), 3.41-3.21 (m, 2H), 1.88-1.71 (m, 2H), 0.94 (s, 9 H), 0.93 (s, 9 H), 0.89 (s, 9 H), 0.88 (s, 9 H), 0.14 (s, 3 H), 0.08 (s, 3 H), 0.06 (s, 3 H), 0.03 (s, 3 H);  $^{13}\text{C}$  NMR (100 MHz,  $\text{CDCl}_3$ )  $\delta$  142.3, 138.4, 114.0, 113.6, 68.0, 63.5, 48.0, 38.1, 37.3, 25.9, 25.7, 25.7, 25.6, 25.5, -2.9, -4.4, -4.8, -5.1, -5.3, -5.5; MS-ESI ( $m/z$ ):  $[\text{M}+\text{H}]^+$  calcd for  $\text{C}_{17}\text{H}_{37}\text{N}_3\text{NaO}_2\text{Si}_2$ : 394.2. Found: 394.3.

<sup>5</sup> Mass spectroscopy was attempted, but was not successful. The material was further derivatized for structural proof.

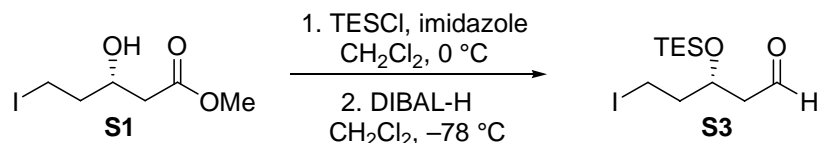

**(3R)-5-iodo-3-(triethylsilyloxy)pentanal (S3):** To a solution of alcohol **S1** (2.51 g, 9.7 mmol) and imidazole (990 mg, 14.6 mmol) in  $\text{CH}_2\text{Cl}_2$  (35 mL) at 0 °C was added chlorotriethylsilane (1.77 g, 11.6 mmol) dropwise over 3 min. The solution was stirred for 40 min and a white precipitate appeared during this time. The reaction was quenched with saturated  $\text{NaHCO}_3$  solution (30 mL) and the layers were separated. The aqueous layer was extracted with  $\text{CH}_2\text{Cl}_2$  (20 mL). The combined organic layers were dried over anhydrous  $\text{MgSO}_4$ , filtered, and concentrated by rotary evaporation to provide 4.14 g of silyl ether as a yellow oil. The crude product was dissolved in  $\text{CH}_2\text{Cl}_2$  (27 mL), cooled to -78 °C, and DIBAL-H (1.0 M in hexanes, 29 mL) was added in one portion. The solution was stirred for 2 h, then quenched with 20 mL 1:1  $\text{MeOH:H}_2\text{O}$ . The resulting solution was warmed to ambient temperature and stirred for 15 min. The mixture was then filtered through anhydrous  $\text{MgSO}_4$  and the solids were rinsed with  $\text{EtOAc}$  (100 mL). The filtrate was concentrated by rotary evaporation to provide the crude aldehyde (**S3**) as a colorless oil. Purification by flash chromatography (10%  $\text{EtOAc}$  in hexanes) afforded 2.01 g of aldehyde **S3** (61 %) as a colorless oil. IR (neat) 2954, 2909, 2875, 1723, 1457  $\text{cm}^{-1}$ ;  $^1\text{H}$  NMR (400 MHz,  $\text{CDCl}_3$ )  $\delta$  9.81 (t,  $J$  = 2.4 Hz, 1 H), 4.30 (dt,  $J$  = 6.2, 5.5 Hz, 1 H), 3.21 (t,  $J$  = 7.3 Hz, 2 H), 2.60-2.57 (m, 2 H), 2.12-2.00 (m, 2 H), 0.97 (t,  $J$  = 7.9 Hz, 9 H), 0.65 (q,  $J$  = 7.9 Hz, 6 H);  $^{13}\text{C}$  NMR (100 MHz,  $\text{CDCl}_3$ )  $\delta$  201.0, 68.0, 50.6, 41.4, 6.8, 5.0, 1.3.

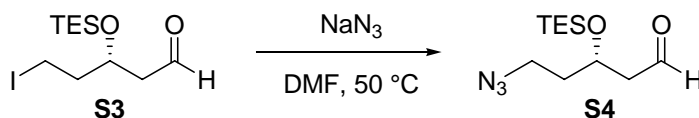

**(3S)-5-azido-3-(triethylsilyloxy)pentanal (S4):** A solution of iodide **S3** (1.87g, 5.5 mmol) and  $\text{NaN}_3$  (710 mg, 10.9 mmol) in DMF (20 mL) was heated to 50 °C for 18 h. The resulting yellow mixture was taken up in  $\text{Et}_2\text{O}$  (30 mL) and washed with brine (5x20 mL). The organic layer was dried over anhydrous  $\text{Na}_2\text{SO}_4$ , filtered and concentrated by rotary evaporation to provide the crude azide (**S4**) as a yellow oil. Purification by flash chromatography (5%  $\text{EtOAc}$  in hexanes) afforded 447 mg of azide **S4** (31 %) as a yellow oil.  $[\alpha]_{24}^{\text{D}} = -34.0^\circ$  ( $c$  = 0.2,  $\text{CH}_2\text{Cl}_2$ ); IR (neat) 2955, 2912, 2877, 1094, 1724, 1458  $\text{cm}^{-1}$ ;  $^1\text{H}$  NMR (400 MHz,  $\text{CDCl}_3$ )  $\delta$  9.82 (t,  $J$  = 2.4 Hz, 1 H), 4.35 (quint,  $J$  = 5.8 Hz, 1 H), 3.43-3.39 (m, 2 H), 2.61 (dd,  $J$  = 5.8, 2.1 Hz, 2 H), 1.83-1.78 (m, 2 H), 0.97 (t,  $J$  = 7.9 Hz, 9 H), 0.63 (q,  $J$  = 7.9 Hz, 6 H);  $^{13}\text{C}$  NMR (100 MHz,  $\text{CDCl}_3$ )  $\delta$  201.0, 65.0, 51.0, 47.5, 36.4, 6.7, 4.8.

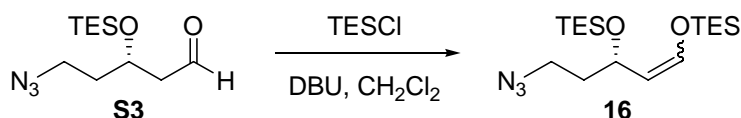

**(3R)-Bis-(triethylsilyloxy)-5-azido-pent-1-ene (16):** To a solution of **S4** (45 mg, 0.17 mmol) and 1,8-diazabicyclo[5.4.0]undec-7-ene (52 mg, 0.34 mmol) in  $\text{CH}_2\text{Cl}_2$  (0.9 mL) was added chlorotriethylsilane (38 mg, 0.26 mmol). The solution was stirred for 20 h. The resulting yellow

solution was then concentrated by rotary evaporation and purified by flash chromatography (hexanes) to afford 21 mg of the silyl enol ether **16** (*Z/E* = 40:60), along with 82 mg of triethylsilanol as a colorless oil. <sup>1</sup>H NMR (300 MHz, CDCl<sub>3</sub>) δ 6.41 (d, *J*=11.9 Hz, 1H, *trans*), 6.19 (dd, *J*=5.9, 1.1 Hz, 1H, *cis*), 4.98 (dd, *J*=12.1, 8.5 Hz, 1H, *trans*), 4.87-4.79 (m, 1H, *cis*), 4.48 (dd, *J*=8.7, 5.9 Hz, 1H, *cis*), 4.23-4.00 (m, 1H, *trans*), 3.45-3.17 (m, 2H), 1.94-1.62 (m, 2H), 0.93 (t, *J*=9 Hz, 9 H, triethylsilanol), 0.53 (q, *J*=9 Hz, 6 H, triethylsilanol).

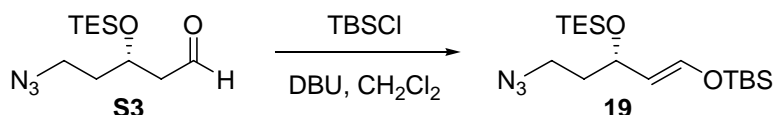

**(*E*)-(3*R*)-5-azido-3-triethylsilyloxy-1-(*tert*-butyl-dimethyl-silanyloxy)-pent-1-ene (19):** To a solution of **S4** (50 mg, 0.19 mmol) and 1,8-diazabicyclo[5.4.0]undec-7-ene (86 mg, 0.57 mmol) in CH<sub>2</sub>Cl<sub>2</sub> (2 mL) was added *tert*-butyldimethylsilyl chloride (57 mg, 0.38 mmol). The solution was heated to 35 °C in a sealed tube for 14 h. The resulting yellow solution was then concentrated by rotary evaporation and purified by flash chromatography (1% EtOAc in hexanes) to afford 54 mg (76%) of silyl enol ether **19** (*Z/E* < 5:95). <sup>1</sup>H NMR (400 MHz, CDCl<sub>3</sub>) δ 6.40 (d, *J*=12.0 Hz, 1H), 4.98 (dd, *J*=8.5, 12.0 Hz, 1H), 4.25-3.95 (m, 1H), 3.44-3.17 (m, 2H), 1.90-1.75 (m, 1H), 1.75-1.63 (m, 1 H), 0.95 (t, *J*=8.0 Hz, 9H), 0.93 (s, 9H), 0.60 (q, *J*=8.0 Hz, 6H), 0.16 (s, 6H).

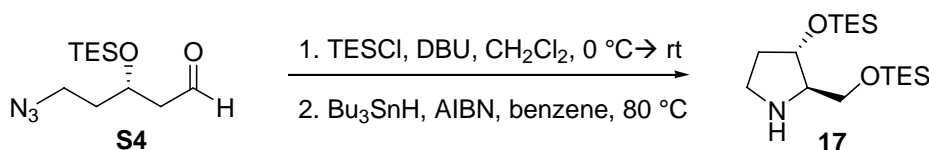

**(2*R*,3*S*)-2,3-bis(triethylsilyloxy)-pyrrolidine (17):** To a solution of aldehyde **S4** (80 mg, 0.31 mmol) and 1,8-diazabicyclo[5.4.0]undec-7-ene (142 mg, 0.93 mmol) in CH<sub>2</sub>Cl<sub>2</sub> (2 mL) at 0 °C was added chlorotriethylsilane (93 mg, 0.62 mmol) in one portion. The solution was stirred for 15 min, then the solution was allowed to warm to room temperature and stirred for 18 h. The resulting yellow solution was then concentrated by rotary evaporation and purified by flash chromatography (hexanes) to afford 17 mg of the silyl enol ether **20** (*Z/E* > 95:5), along with 74 mg of triethylsilanol as a colorless oil. <sup>1</sup>H NMR (300 MHz, CDCl<sub>3</sub>) δ 6.19 (dd, *J*=5.9, 1.1 Hz, 1H), 4.87-4.79 (m, 1H), 4.48 (dd, *J*=8.7, 5.7 Hz, 1H), 3.33 (t, *J*=7.4 Hz, 2H), 1.76-1.69 (m, 2H), 0.93 (t, *J*=9 Hz, 9 H, triethylsilanol), 0.53 (q, *J*=9 Hz, 6 H, triethylsilanol).<sup>6</sup>

This oil was taken up in benzene (10 mL) and the solution was degassed by bubbling with N<sub>2</sub> for 30 min. The solution was then brought to reflux and a solution of tributyltin hydride (73 mg, 0.25 mmol) and AIBN (9 mg, 0.05 mmol) in benzene (2 mL) was added dropwise over 2 hours. After refluxing for an additional 11 h, the solution was allowed to cool to room temperature and the solvent was removed by rotary evaporation. Purification by flash chromatography (2% MeOH in CH<sub>2</sub>Cl<sub>2</sub>) afforded 12 mg of amine **17** (77% from silyl enol ether **20**). [ $\alpha$ ]<sub>24</sub><sup>D</sup> = -17.2° (*c* = 0.8, CH<sub>2</sub>Cl<sub>2</sub>); IR (neat) 2955, 2876, 1652, 1458 cm<sup>-1</sup>; <sup>1</sup>H NMR (400 MHz, CDCl<sub>3</sub>) δ 4.18-4.05 (m, 1H), 3.65-3.45 (m, 2H), 3.14-3.01 (m, 1H), 3.01-2.98 (m, 2H), 1.99-1.77 (m, 3H), 0.96 (t, *J*=7.9

<sup>6</sup> For NMR data for a mixture of the *E* and *Z* silyl enol ether, see data for compound **16**.

Hz, 18 H), 0.60 (q,  $J=7.9$  Hz, 12 H);  $^{13}\text{C}$  NMR (100 MHz,  $\text{CDCl}_3$ )  $\delta$  73.9, 68.5, 63.4, 45.1, 35.6, 6.9, 5.0, 4.5; HRMS-ESI ( $m/z$ ):  $[\text{M}+\text{H}]^+$  calcd for  $\text{C}_{17}\text{H}_{40}\text{NO}_2\text{Si}_2$ : 346.2598. Found: 346.2605.

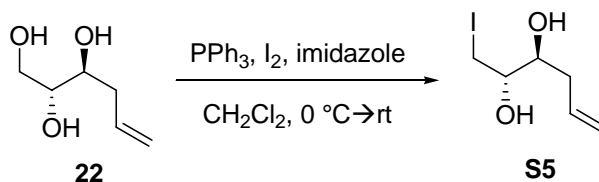

**(4S,5S)-6-Iodo-hex-1-ene-diol (S5):** To a solution of known triol **22**<sup>7</sup> (3.72 g, 28.0 mmol) in THF (150 mL) at 0 °C was added triphenylphosphine (9.61 g, 36.4 mmol), imidazole (2.86 g, 42.0 mmol), and iodine (8.53 g, 33.6 mmol) and the solution was stirred for 5 h at room temperature. A white precipitate of imidazole hydroiodide was formed, which was removed by filtering the mixture through a pad of Celite. The filtrate was washed with saturated  $\text{Na}_2\text{S}_2\text{O}_3$  solution (2x25 mL), brine (25 mL), dried over  $\text{Na}_2\text{SO}_4$ , filtered and concentrated by rotary evaporation to provide a yellow oil. Purification by flash chromatography (4:1 hexanes/EtOAc) afforded 4.61 g (68%) of iodide **S5** as a white solid.  $[\alpha]_{24}^{\text{D}} = 342.7^\circ$  ( $c = 0.2$ ,  $\text{CH}_2\text{Cl}_2$ ); Mp: 83 °C; IR (neat) 3275, 2893, 1500, 1413, 1105  $\text{cm}^{-1}$ ;  $^1\text{H}$  NMR (400 MHz,  $\text{CDCl}_3$ )  $\delta$  5.92-5.75 (m, 1 H), 5.19 (m, 2 H), 3.68 (s, br 1 H), 3.59-3.33 (m, 3 H), 2.47 (d,  $J = 4.0$  Hz, 2 H), 2.32-2.12 (m, 2 H);  $^{13}\text{C}$  NMR (100 MHz,  $\text{CDCl}_3$ )  $\delta$  133.9, 119.0, 73.5, 72.4, 37.2, 12.2; MS-ESI ( $m/z$ ):  $[\text{M}+\text{H}]^+$  calcd for  $\text{C}_6\text{H}_{12}\text{IO}_2$ : 243.1. Found: 243.2.

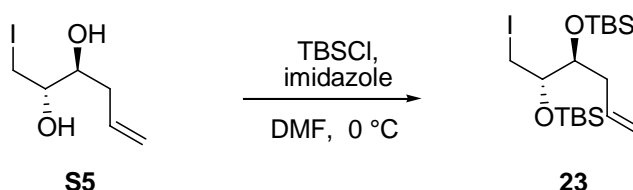

**(4S,5S)-Bis-(tert-butyl-dimethyl-silanyloxy)-6-iodo-hex-1-ene (23):** To a solution of iodide **S5** (4.48 g, 18.5 mmol) in DMF (60 mL) at 0 °C was added imidazole (7.55 g, 111 mmol) in one portion. *tert*-Butyldimethylsilyl chloride (6.70 g, 44.4 mmol) was added in small portions to the cold solution. The reaction mixture then allowed to warm to ambient temperature and stirred for 2 days. The reaction was diluted with EtOAc (90 mL) and then the mixture was washed with water (3x40 mL) and brine (40 mL). The organic layer was dried over  $\text{Na}_2\text{SO}_4$ , and the solvent was removed by rotary evaporation to provide a light yellow oil. Purification by flash chromatography (1% EtOAc in hexanes) afforded 7.04 g (81%) of iodide **23** as a white solid.  $[\alpha]_{24}^{\text{D}} = 95.3^\circ$  ( $c = 0.5$ ,  $\text{CH}_2\text{Cl}_2$ ); Mp: 42 °C; IR (neat) 2956, 2858, 1666, 1472, 1255  $\text{cm}^{-1}$ ;  $^1\text{H}$  NMR (400 MHz,  $\text{CDCl}_3$ )  $\delta$  5.91-5.78 (m, 1 H), 5.10 (d,  $J = 6.8$  Hz, 1 H), 5.07 (s, 1 H), 3.76 (q,  $J = 4.8$  Hz, 1 H), 3.49-3.39 (m, 1 H), 3.33-3.24 (m, 2 H), 2.41-2.29 (m, 2 H), 0.94 (s, 9 H), 0.90 (s, 9 H), 0.16 (s, 6 H), 0.14 (s, 3 H), 0.11 (s, 3 H), 0.09 (s, 3 H);  $^{13}\text{C}$  NMR (100 MHz,  $\text{CDCl}_3$ )  $\delta$  134.5, 117.4, 74.6, 73.1, 37.0, 26.0, 25.9, 18.1, 13.3, -4.1, -4.2, -4.4.<sup>5</sup>

<sup>7</sup> Morita, M.; Haketa, T.; Koshino, H.; Nakata, T. *Org. Lett.* **2008**, *10*, 1679-1682.

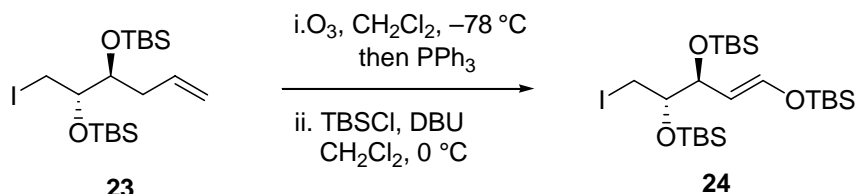

**(E)-(1,3S,4S)-Tris-(tert-butyl-dimethyl-silanyloxy)-5-iodo-pent-1-ene (24):** A solution of iodide **23** (2.71 g, 5.77 mmol) in CH<sub>2</sub>Cl<sub>2</sub> (60 mL) at –78 °C was sparged with ozone for 50 min. Triphenylphosphine (1.58 g, 6.0 mmol) was then added in one portion, and the mixture was stirred for an additional 30 min at –78 °C. The reaction was then warmed to 0 °C. To this solution was added 1,8-diazabicyclo[5.4.0]undec-7-ene (2.90 g, 19.0 mmol) and *tert*-butyldimethylsilyl chloride (1.30 g, 8.7 mmol). The resulting solution was allowed to warm to ambient temperature and stirred for 24 h. The reaction mixture was then quenched with saturated NaHCO<sub>3</sub> solution (15 mL) and extracted with CH<sub>2</sub>Cl<sub>2</sub> (2x10 mL). Excess triphenylphosphine was quenched by adding a solution of I<sub>2</sub> in CH<sub>2</sub>Cl<sub>2</sub> (1 M). The organic extracts were dried over Na<sub>2</sub>SO<sub>4</sub>, filtered, and the solvent was removed by rotary evaporation to provide a yellow oil. Purification by flash chromatography (1% EtOAc in hexanes) gave 1.90 g (55% over 2 steps) of silyl enol ether **24** (*E/Z* > 95:5) as a colorless oil. IR (neat) 2958, 2858, 1655, 1463, 1363, 1256 cm<sup>-1</sup>; <sup>1</sup>H NMR (400 MHz, CDCl<sub>3</sub>) δ 6.36 (d, *J* = 12.0 Hz, 1 H), 4.91 (dd, *J* = 12.0, 9.2 Hz, 1 H), 4.00 (dd, *J* = 9.2, 6.4 Hz, 1 H), 3.43 (dd, *J* = 10.0, 3.2 Hz, 1 H), 3.28–3.22 (m, 1 H), 3.17 (dd, *J* = 10.0, 5.2 Hz, 1 H), 0.93 (s, 9 H), 0.91 (s, 9 H), 0.90 (s, 9 H), 0.16 (s, 3 H), 0.15 (s, 3 H), 0.11 (s, 3 H), 0.09 (s, 3 H), 0.08 (s, 3 H), 0.07 (s, 3 H); <sup>13</sup>C NMR (100 MHz, CDCl<sub>3</sub>) δ 143.6, 110.7, 74.5, 73.9, 26.0, 25.9, 25.6, 18.13, 18.10, –3.8, –4.3, –4.4, –4.5, –5.1, –5.2.<sup>5</sup>

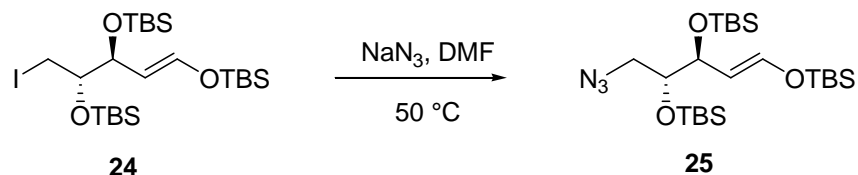

**(E)-5-Azido-(1,3S,4S)-(tert-butyl-dimethyl-silanyloxy)-pent-1-ene (25):** To a solution of iodide **24** (1.708 g, 2.91 mmol) in DMF (20 mL) was added sodium azide (426 mg, 6.0 mmol). The mixture was heated at 50 °C for 10 h and then diluted with EtOAc (60 mL). The reaction solution was washed with water (2x20 mL), brine (20 mL). The organics layer was then dried over Na<sub>2</sub>SO<sub>4</sub>, filtrated and concentrated by rotary evaporation to provide a yellow oil. Purification by flash chromatography (hexanes) gave 1.23 g (84%) of azide **25** (*E/Z* > 95:5) as a clear oil. [α]<sub>D</sub><sup>24</sup> = 262.7° (*c* = 0.2, CH<sub>2</sub>Cl<sub>2</sub>); IR (neat) 2956, 2858, 2102, 1667, 1472, 1256 cm<sup>-1</sup>; <sup>1</sup>H NMR (400 MHz, CDCl<sub>3</sub>) δ 6.35 (d, *J* = 12.0 Hz, 1 H), 4.90 (dd, *J* = 12.0, 7.2 Hz, 1 H), 3.99 (dd, *J* = 8.8, 5.6 Hz, 1 H), 3.61 (q, *J* = 4.8 Hz, 1 H), 3.39 (dd, *J* = 12.4, 3.6 Hz, 1 H), 3.31 (dd, *J* = 12.4, 4.8 Hz, 1 H), 0.93 (s, 9 H), 0.91 (s, 9 H), 0.88 (s, 9 H), 0.150 (s, 3 H), 0.147 (s, 3 H), 0.11 (s, 3 H), 0.08 (s, 3 H), 0.07 (s, 3 H), 0.05 (s, 3 H); <sup>13</sup>C NMR (100 MHz, CDCl<sub>3</sub>) δ 143.4, 111.3, 75.7, 72.6, 54.0, 25.90, 25.88, 25.58, 18.15, 18.11, 18.07, –3.9, –4.4, –4.6, –4.7, –5.1, –5.2.<sup>5</sup>

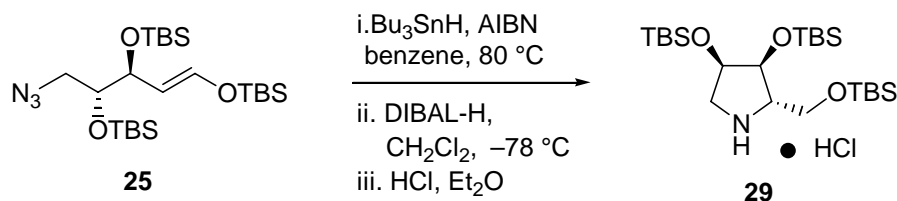

**(2S,3S,4R)-3,4-Bis(tert-butyldimethylsilyloxy)-2-((tert-butyldimethylsilyloxy)methyl)-pyrrolidine Hydrochloride (29):** To a solution of silyl enol ether (131 mg, 0.26 mmol), and AIBN (4 mg) in degassed benzene (26 mL) at 80 °C was added a solution of tributyltin hydride (76 mg, 0.26 mmol) and AIBN (4 mg, 0.1 equiv.) in benzene (5 mL) dropwise, via syringe pump, over 2 hours. The reaction was stirred at 80 °C for another 3 hours. The solution was allowed to cool to room temperature and the solvent was removed by rotary evaporation. The resulting residue was dissolved in CH<sub>2</sub>Cl<sub>2</sub> (5 mL) and cooled to -78 °C. DIBALH (0.4 mL, 1.0 M in toluene) was added dropwise over 3 min and the solution was stirred at -78 °C for 1 hour. The reaction was quenched with saturated NaHCO<sub>3</sub> (5 mL), and the aqueous layer was extracted with CH<sub>2</sub>Cl<sub>2</sub> (2x10 mL). The combined organic extracts were dried over Na<sub>2</sub>SO<sub>4</sub>, filtered, and the solvent was removed by rotary evaporation to provide a pale yellow oil. Purification by flash chromatography (15% EtOAc in hexanes) afforded 78 mg colorless oil as the cyclized product **26** (containing 8% of reduced primary amine **28**) and 6 mg (5 %) of pure cyclized product **26**:  $[\alpha]_{24}^D = -88.8^\circ$  ( $c = 0.3$ , CH<sub>2</sub>Cl<sub>2</sub>); IR (neat) 2950, 2856, 1252, 1164 cm<sup>-1</sup>; <sup>1</sup>H NMR (400 MHz, CDCl<sub>3</sub>)  $\delta$  4.16-4.05 (m, 2 H), 3.79 (d,  $J = 6.8$  Hz, 2 H), 3.29 (q,  $J = 6.4$  Hz, 1 H), 3.15 (dd,  $J = 10.8, 5.6$  Hz, 1 H), 3.27 (dd,  $J = 10.8, 4.2$  Hz, 1 H), 2.94-2.72 (br, s, 1 H), 0.92 (s, 9 H), 0.90 (s, 18 H), 0.11 (s, 3 H), 0.10 (s, 3 H), 0.08 (s, 6 H), 0.07 (s, 6 H); <sup>13</sup>C NMR (100 MHz, CDCl<sub>3</sub>)  $\delta$  73.9, 73.7, 62.6, 61.7, 50.1, 25.98, 25.94, 18.34, 18.30, 18.24, -4.3, -4.6, -4.8, -5.0, -5.27, -5.28; HRMS-ESI ( $m/z$ ):  $[M+H]^+$  calcd for C<sub>23</sub>H<sub>54</sub>NO<sub>3</sub>Si<sub>3</sub>: 476.3412. Found: 476.3415.

To further purify the cyclized product from the free amine byproduct, the impure product mixture (78 mg) was dissolved in CH<sub>2</sub>Cl<sub>2</sub> (1 mL) and HCl in diethyl ether (0.2 mL, 1.0 M) was added and the flask. The resulting solution was stirred for 5 min. Hexanes (10 mL) was added and the solution was cooled to 4 °C and let stand for 6h. Pure white solid as the HCl salt **29** (77 mg, 58%) was isolated by filtration.  $[\alpha]_{24}^D = -18.5^\circ$  ( $c = 0.6$ , CH<sub>2</sub>Cl<sub>2</sub>); Mp: 271-272 °C; IR (neat) 2954, 2857, 1472, 1254 cm<sup>-1</sup>; <sup>1</sup>H NMR (400 MHz, CDCl<sub>3</sub>)  $\delta$  10.9-10.2 (b, s, 1 H), 9.3-8.4 (b, s, 1 H), 4.24 (dd,  $J = 10.8, 4.0$  Hz, 2 H), 3.98 (d,  $J = 7.6$  Hz, 2 H), 3.57 (t,  $J = 4.0$  Hz, 1 H), 3.47-3.40 (m, 1 H), 3.27 (dd,  $J = 11.2, 6.4$  Hz, 1 H), 0.93 (s, 9 H), 0.90 (s, 18 H), 0.12 (s, 12 H), 0.10 (s, 6 H); <sup>13</sup>C NMR (100 MHz, CDCl<sub>3</sub>)  $\delta$  72.2, 72.0, 61.5, 58.8, 47.4, 25.92, 25.87, 18.22, 18.17, -4.3, -4.6, -4.9, -5.0, -5.2, -5.4.

### Cyclization optimization for Protected CYB-3

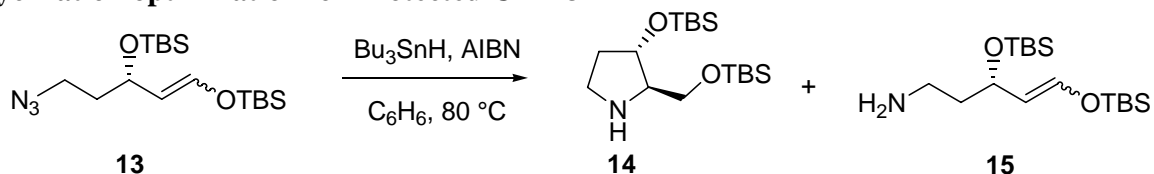

A solution of silyl enol ether **13** (402 mg, 1.08 mmol)  $\text{Bu}_3\text{SnH}$  (409 mg, 1.4 mmol), AIBN (36 mg, 0.22 mmol) in degassed benzene (22 mL) was heated to 80 °C and stirred for 18 h. The solution was allowed to cool to room temperature and the solvent was removed by rotary evaporation. Analysis of the  $^1\text{H}$  NMR spectrum showed no remaining starting material, and products **14**<sup>8</sup> and **15** in a 46:54 ratio. Amine **14** was present in a 60:40 ratio of *trans* and *cis* isomers.

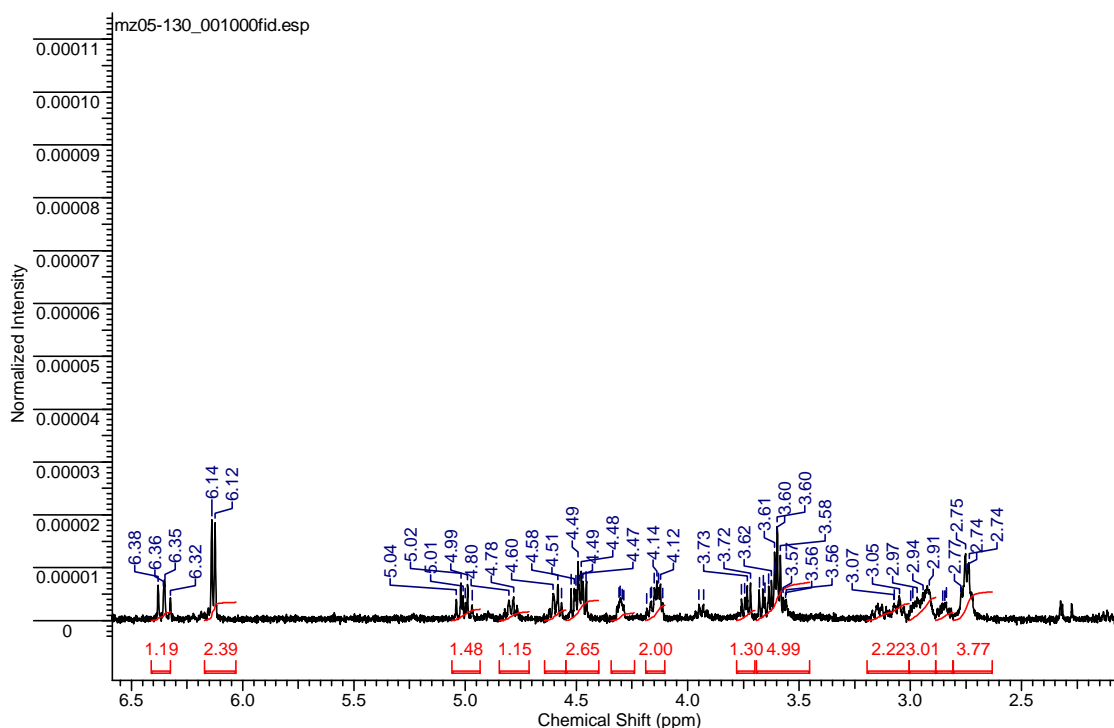

Crude mixture of **14** and **15** after cyclization.

<sup>8</sup> A, Häberli and C. J. Leumann, *Org. Lett.*, 2001, **3**, 489.

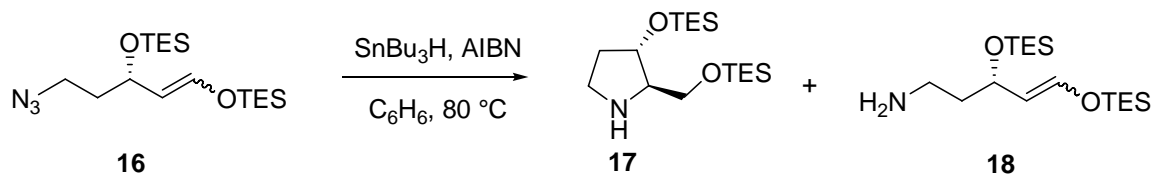

A solution of silyl enol ether **16** (21 mg, 0.06 mmol)  $\text{Bu}_3\text{SnH}$  (106 mg, 0.36 mmol), AIBN (9.2 mg, 0.08 mmol) in degassed benzene (6 mL) was heated to  $80^\circ\text{C}$  and stirred for 18 h. The solution was allowed to cool to room temperature and the solvent was removed by rotary evaporation. Analysis of the  $^1\text{H}$  NMR spectrum showed no remaining starting material, and products **17** and **18** in a 54:46 ratio. Amine **14** was present in a 80:20 ratio of *trans* and *cis* isomers.

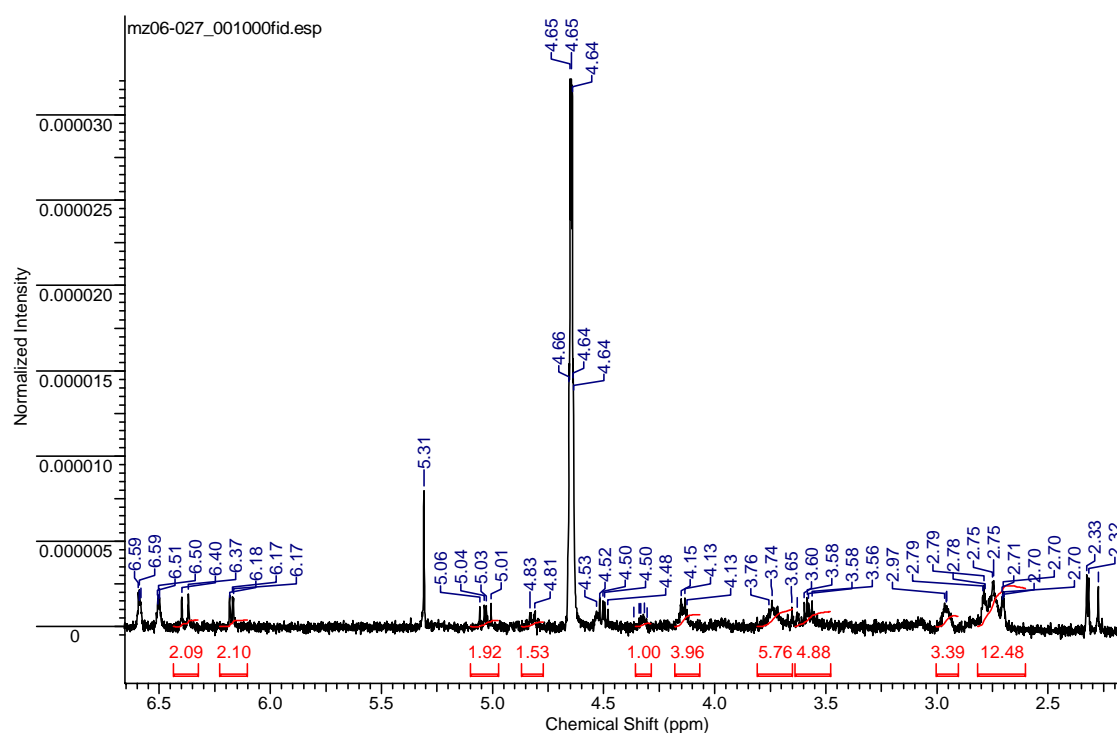

Crude mixture of **17** and **18** after cyclization.

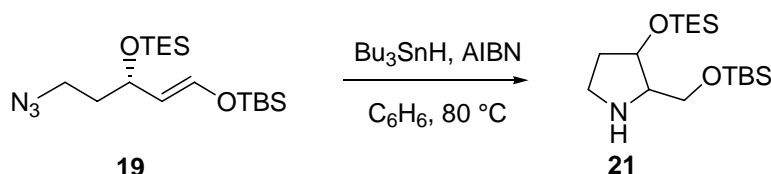

A solution of silyl enol ether **16** (54 mg, 0.14 mmol)  $\text{Bu}_3\text{SnH}$  (55 mg, 0.19 mmol), AIBN (6.1 mg, 0.16 mmol) in degassed benzene (20 mL) was heated to 80 °C and stirred for 4 h, and the solution was allowed to cool to room temperature and the solvent was removed by rotary evaporation. Purification by flash chromatography (2% MeOH in  $\text{CH}_2\text{Cl}_2$ ) afforded 28 mg of amine **21** (57%) as a 1:1 mixture of *cis* and *trans* diastereomers.  $^1\text{H}$  NMR (400 MHz,  $\text{CDCl}_3$ )  $\delta$  4.32-4.30 (m, 1H, *cis*), 4.16-4.11 (m, 1H, *trans*), 3.79-3.58 (m, 1H), 3.18-3.08 (m, 1H), 3.00-2.89 (m, 2H), 2.89-2.74 (m, 1H), 2.06 (broad s, 1H), 2.01-1.83 (m, 2H), 0.96 (t,  $J=7.9$  Hz, 9H), 0.90 (s, 9H), 0.59 (q,  $J=7.9$  Hz, 6H), 0.06 (s, 6 H).

### Fast Addition of Tributyltin Hydride to **25**

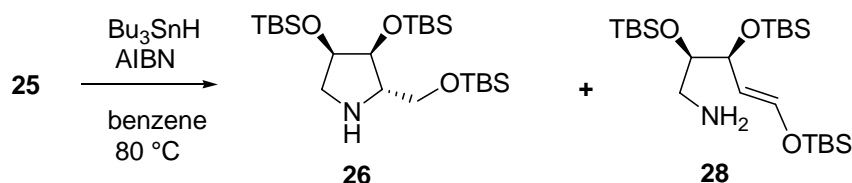

To a solution of silyl enol ether (726 mg, 1.45 mmol), and AIBN (20 mg) in degassed benzene (50 mL) at 80 °C was added a solution of tributyltin hydride (506 mg, 1.74 mmol) and AIBN (20 mg) in benzene (5 mL) dropwise over 5 min. The reaction was stirred at 80 °C for another 5 hours. The solution was allowed to cool to room temperature and the solvent was removed by rotary evaporation. Crude NMR shows there is a mixture of **26** and **28** with a ratio about 3:5. Only trace amount of imine **27** was formed.

### Crude Data for the DIBAL-H Reduction

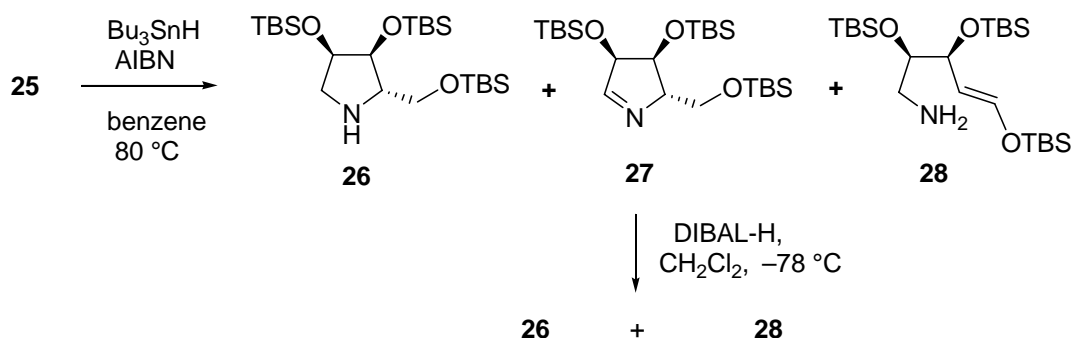

To a solution of silyl enol ether (65 mg, 0.13 mmol), and AIBN (2 mg) in degassed benzene (13 mL) at 80 °C was added a solution of tributyltin hydride (38 mg, 0.13 mmol) and AIBN (2 mg, 0.1 equiv.) in benzene (5 mL) dropwise, via syringe pump, over 2 hours. The reaction was stirred at 80 °C for another 3 hours. The solution was allowed to cool to room temperature and the solvent was removed by rotary evaporation. Crude NMR shows that there is a mixture of **26**, **27** and **28** with a ratio about 2:1:1. The imine proton is a doublet at 7.63 ppm with 4.0 Hz coupling constant. The above crude mixture was dissolved in  $\text{CH}_2\text{Cl}_2$  (5 mL) and cooled to -78 °C.

DIBAL-H (0.3 mL, 1.0 M in toluene) was added dropwise over 3 min and the solution was stirred at  $-78\text{ }^{\circ}\text{C}$  for 1 hour. The reaction was quenched with saturated  $\text{NaHCO}_3$  (5 mL), and the aqueous layer was extracted with  $\text{CH}_2\text{Cl}_2$  (2x10 mL). The combined organic extracts were dried over  $\text{Na}_2\text{SO}_4$ , filtered, and the solvent was removed by rotary evaporation to provide a pale yellow oil. Crude NMR shows that there is a mixture of **26** and **28** with a ratio about 3:1.

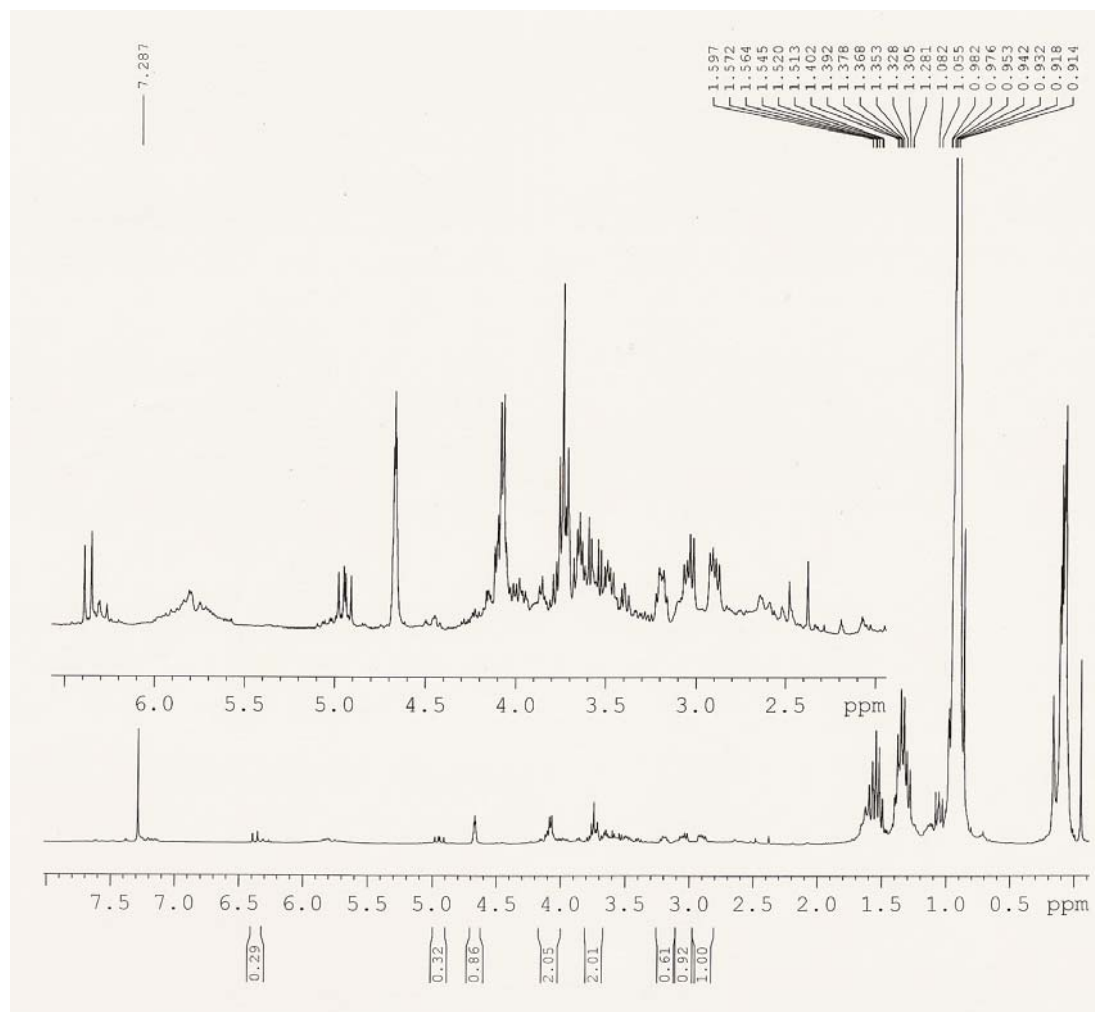

Crude mixture of **26** and **28**, after DIBAL reduction.

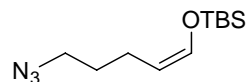

7

JOB NO:  
1H spectrum ref. to CDCl<sub>3</sub> at 7.27 ppm

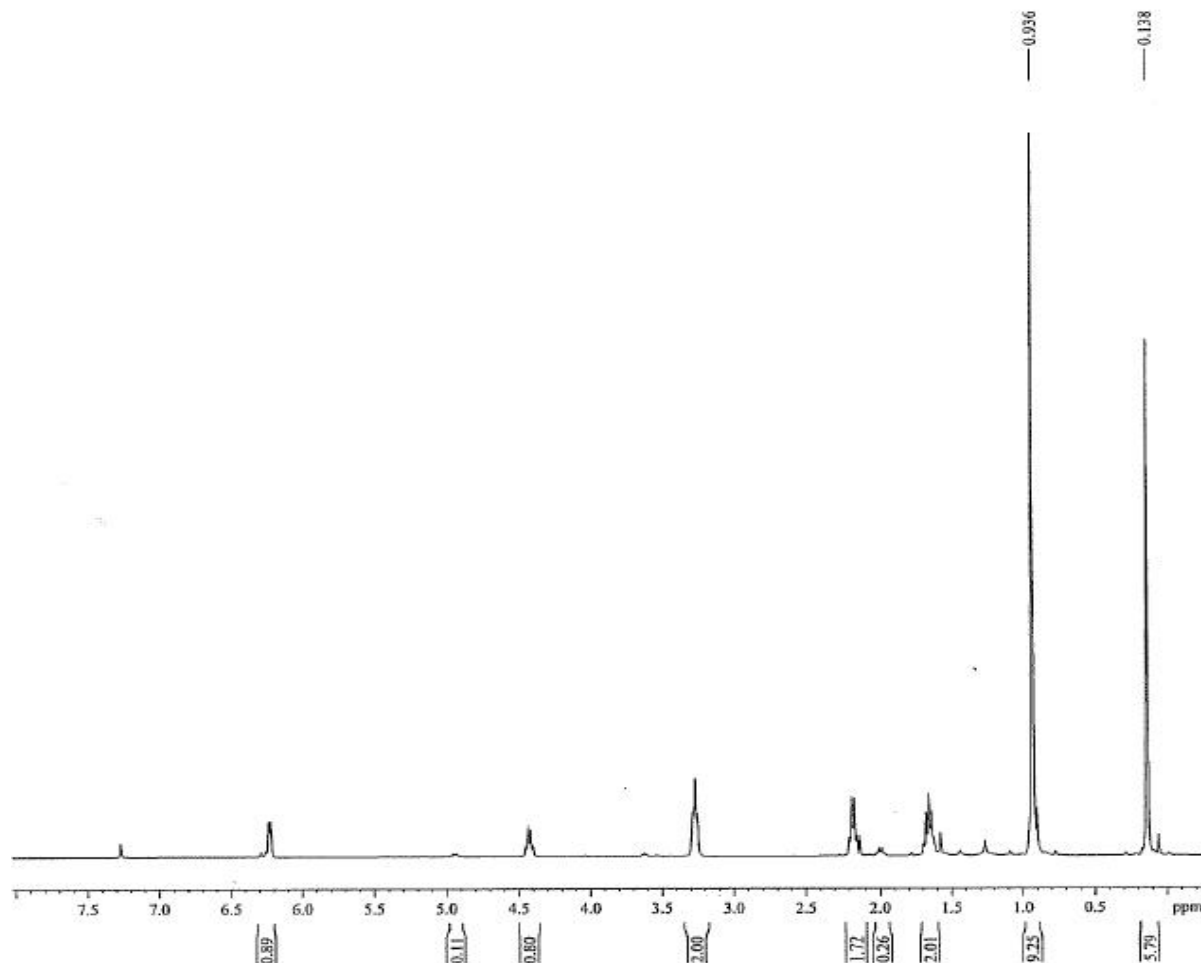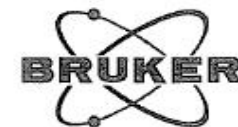

Current Data Parameters  
NAME Zhai-II-95  
EXPNO 1  
PROCNO 1

F2 - Acquisition Parameters  
Date\_ 20060804  
Time 12.13  
INSTRUM av400  
PROBHD 5 mm BBI 1H-BB  
PULPROG zg30  
TD 21954  
SOLVENT CDCl<sub>3</sub>  
NS 13  
DS 2  
SWH 4990.026 Hz  
FIDRES 0.227294 Hz  
AQ 2.1998406 sec  
RG 57  
DM 100.200 usec  
DE 6.00 usec  
TE 298.0 K  
D1 1.00000000 sec  
MCREST 0.00000000 sec  
MCWRK 0.01500000 sec

===== CHANNEL f1 =====  
NUC1 1H  
P1 9.60 usec  
PL1 1.00 dB  
SFO1 400.1324008 MHz

F2 - Processing parameters  
SI 32768  
SF 400.1300051 MHz  
WDW EM  
SSB 0  
LB 0.10 Hz  
GB 0  
PC 1.00

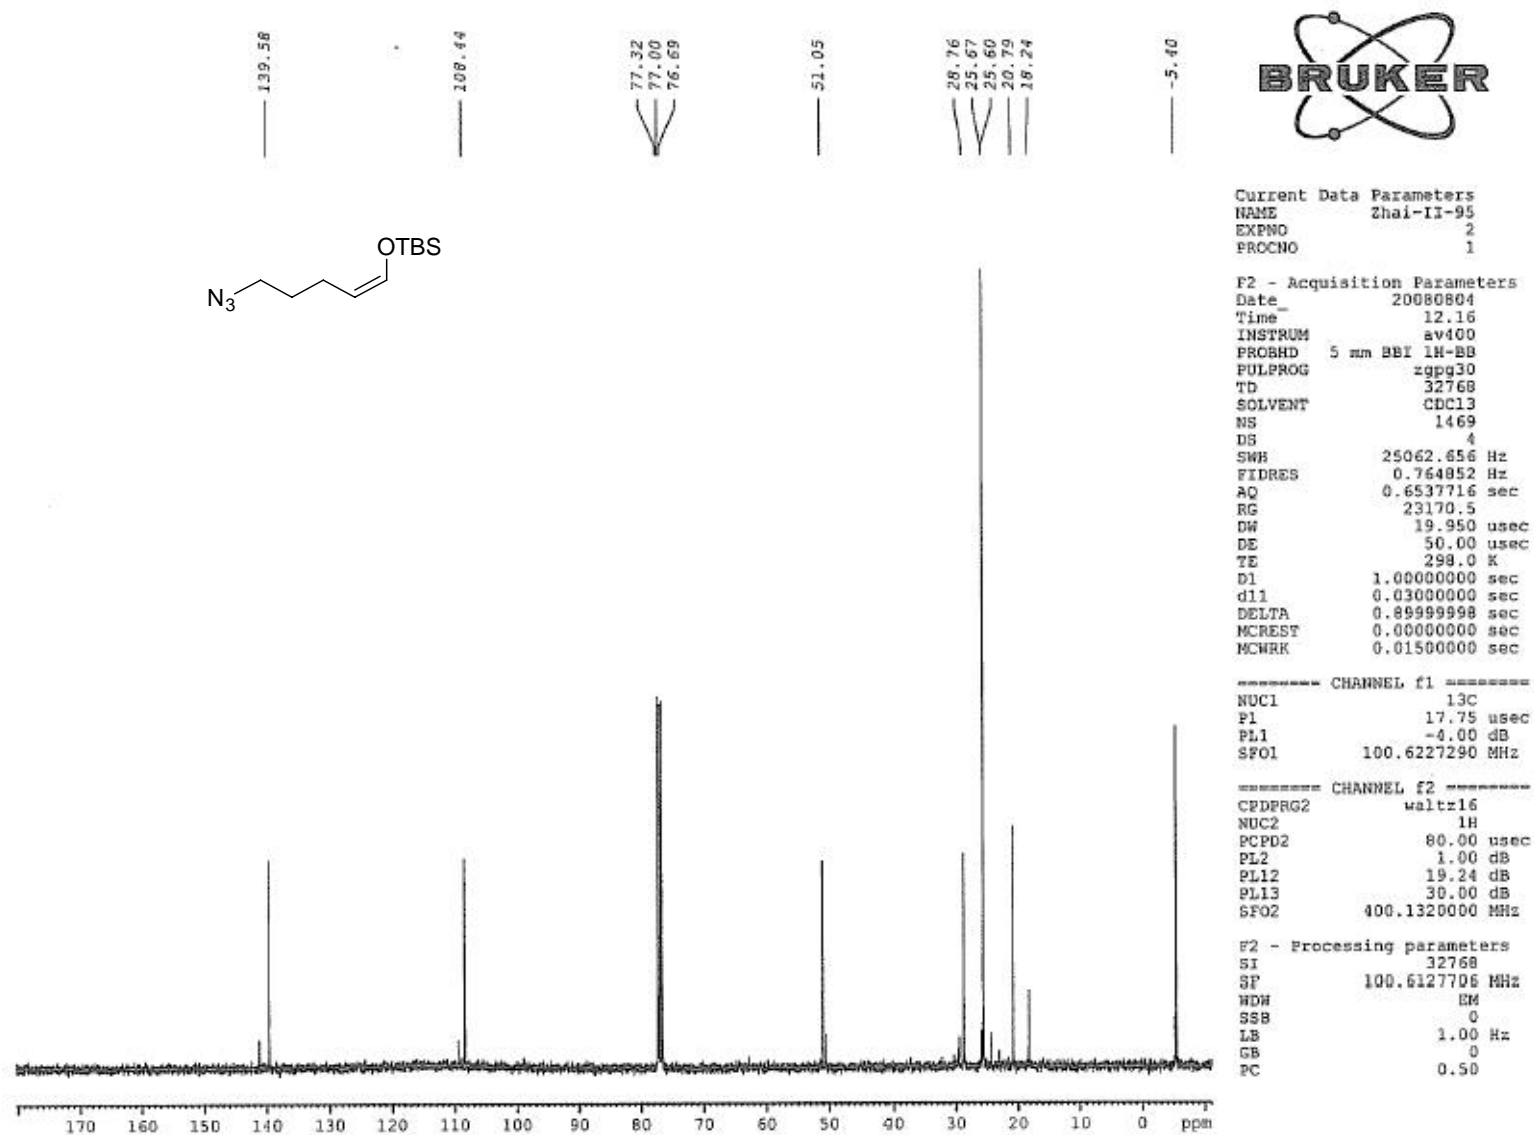

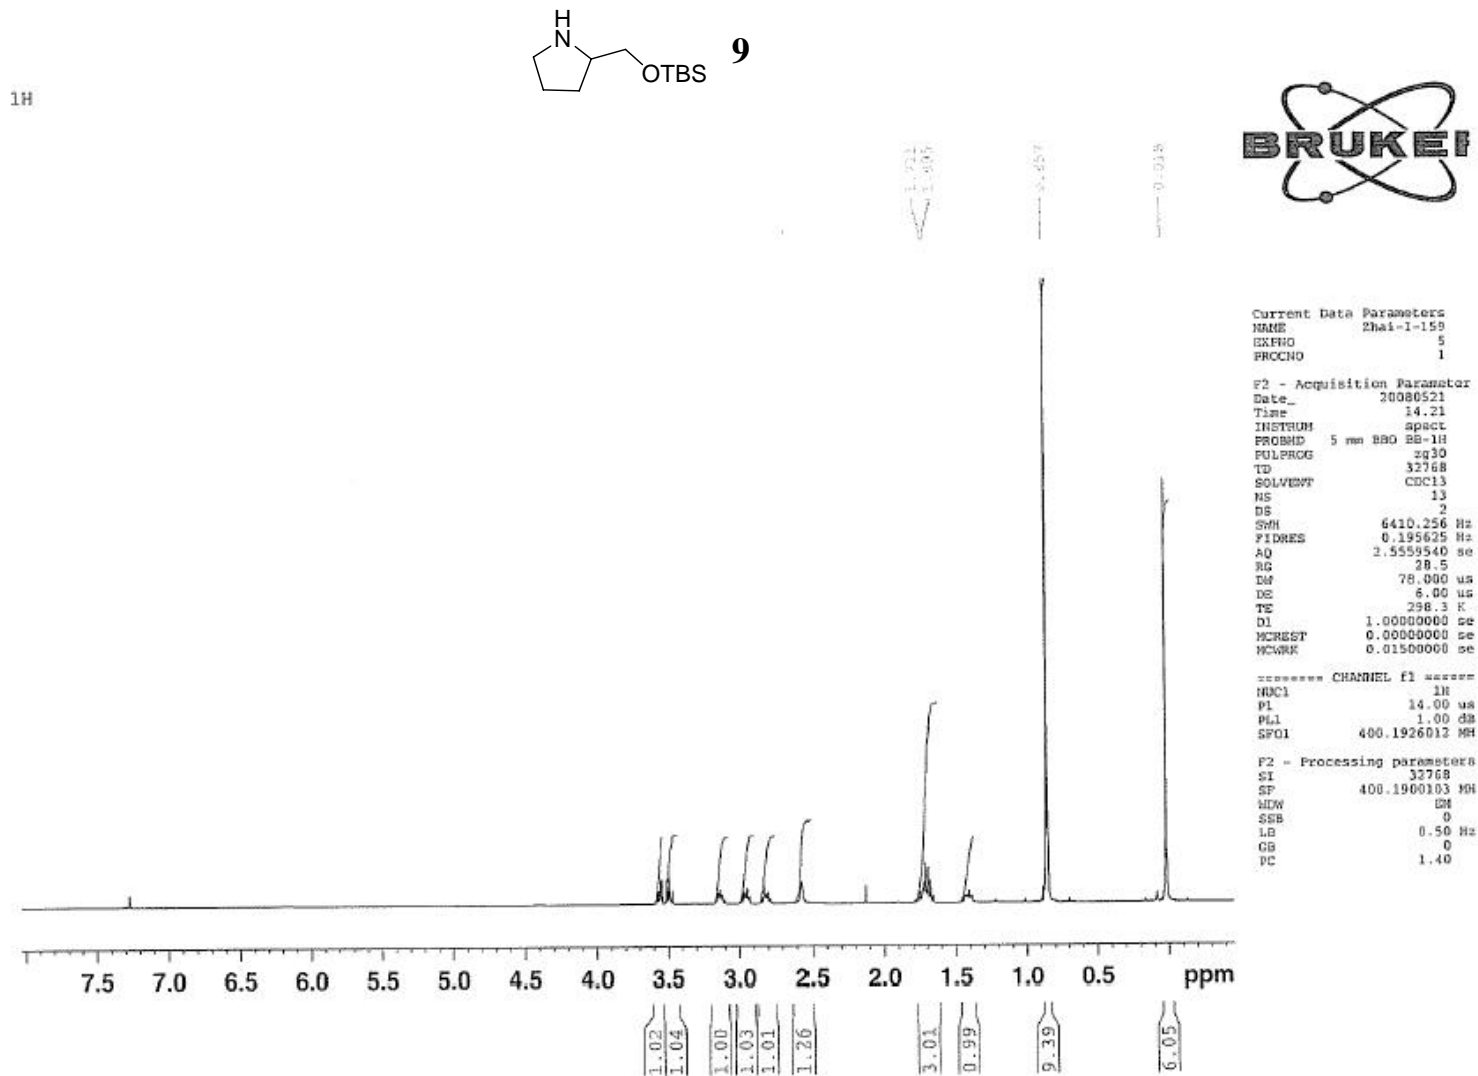

13C

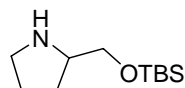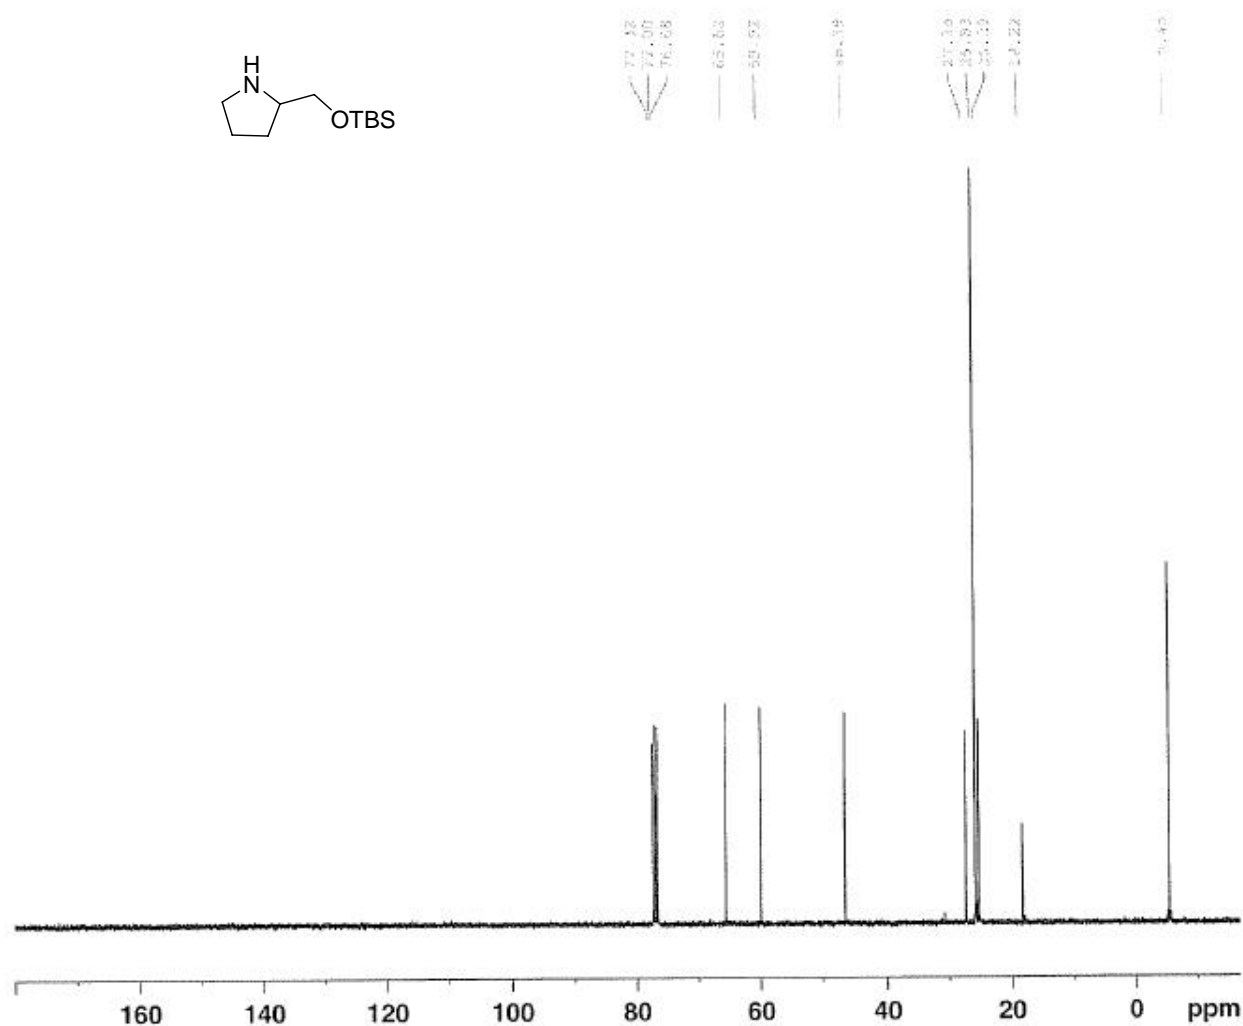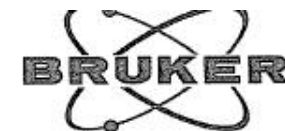

Current Data Parameters  
NAME zhai-1-159  
EXPNO 6  
PROCNO 1

F2 - Acquisition Parameters  
Date\_ 20080521  
Time 14.27  
INSTRUM spect  
PROBHD 5 mm BBO BB-1H  
PULPROG zgpg30  
TD 32768  
SOLVENT CDCl3  
NS 170  
DS 4  
SWH 25125.629 Hz  
FIDRES 0.766773 Hz  
AQ 0.6521332 sec  
RG 645.1  
DN 19.900 usec  
DE 10.00 usec  
TE 298.2 K  
D1 1.0000000 sec  
d11 0.0300000 sec  
DELTA 0.8999999 sec  
MCREST 0.0000000 sec  
MCMRK 0.0150000 sec

\*\*\*\*\* CHANNEL f1 \*\*\*\*\*  
NUC1 13C  
P1 7.88 usec  
PL1 -3.00 dB  
SFO1 100.6279189 MHz

\*\*\*\*\* CHANNEL f2 \*\*\*\*\*  
CPDPRG2 waltz16  
NUC2 1H  
PCPD2 90.00 usec  
PL2 0.00 dB  
PL12 16.00 dB  
PL13 20.00 dB  
SFO2 400.1916008 MHz

F2 - Processing parameters  
SI 32768  
SF 100.6279624 MHz  
WDW EM  
SSB 0  
LB 1.00 Hz  
GB 0  
PC 1.40

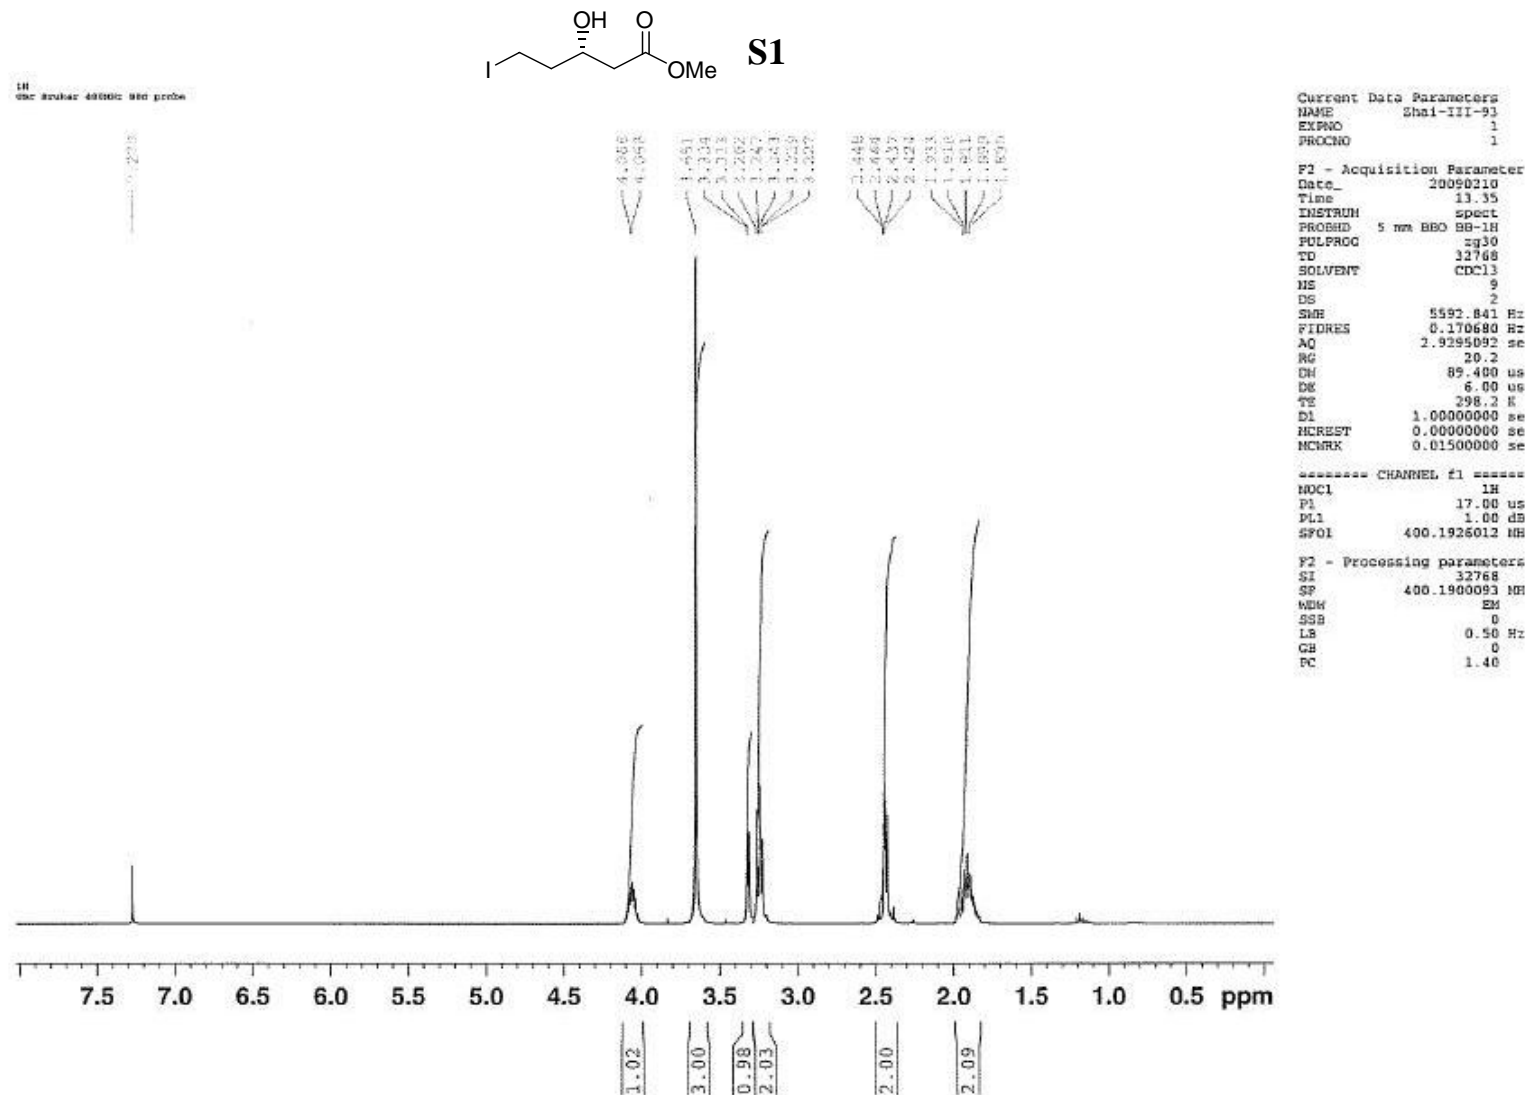

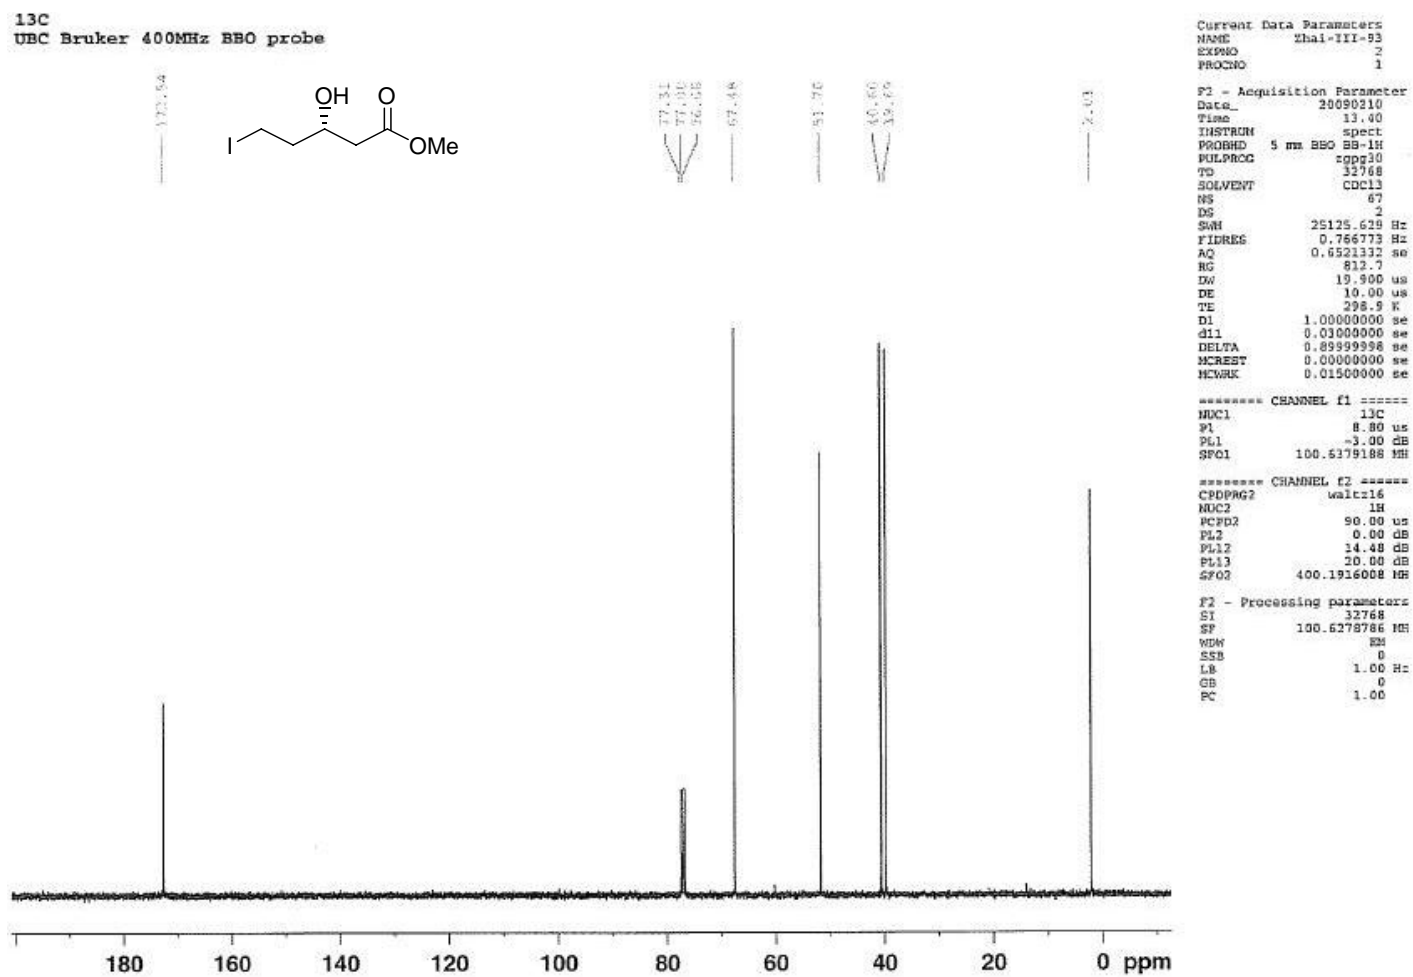

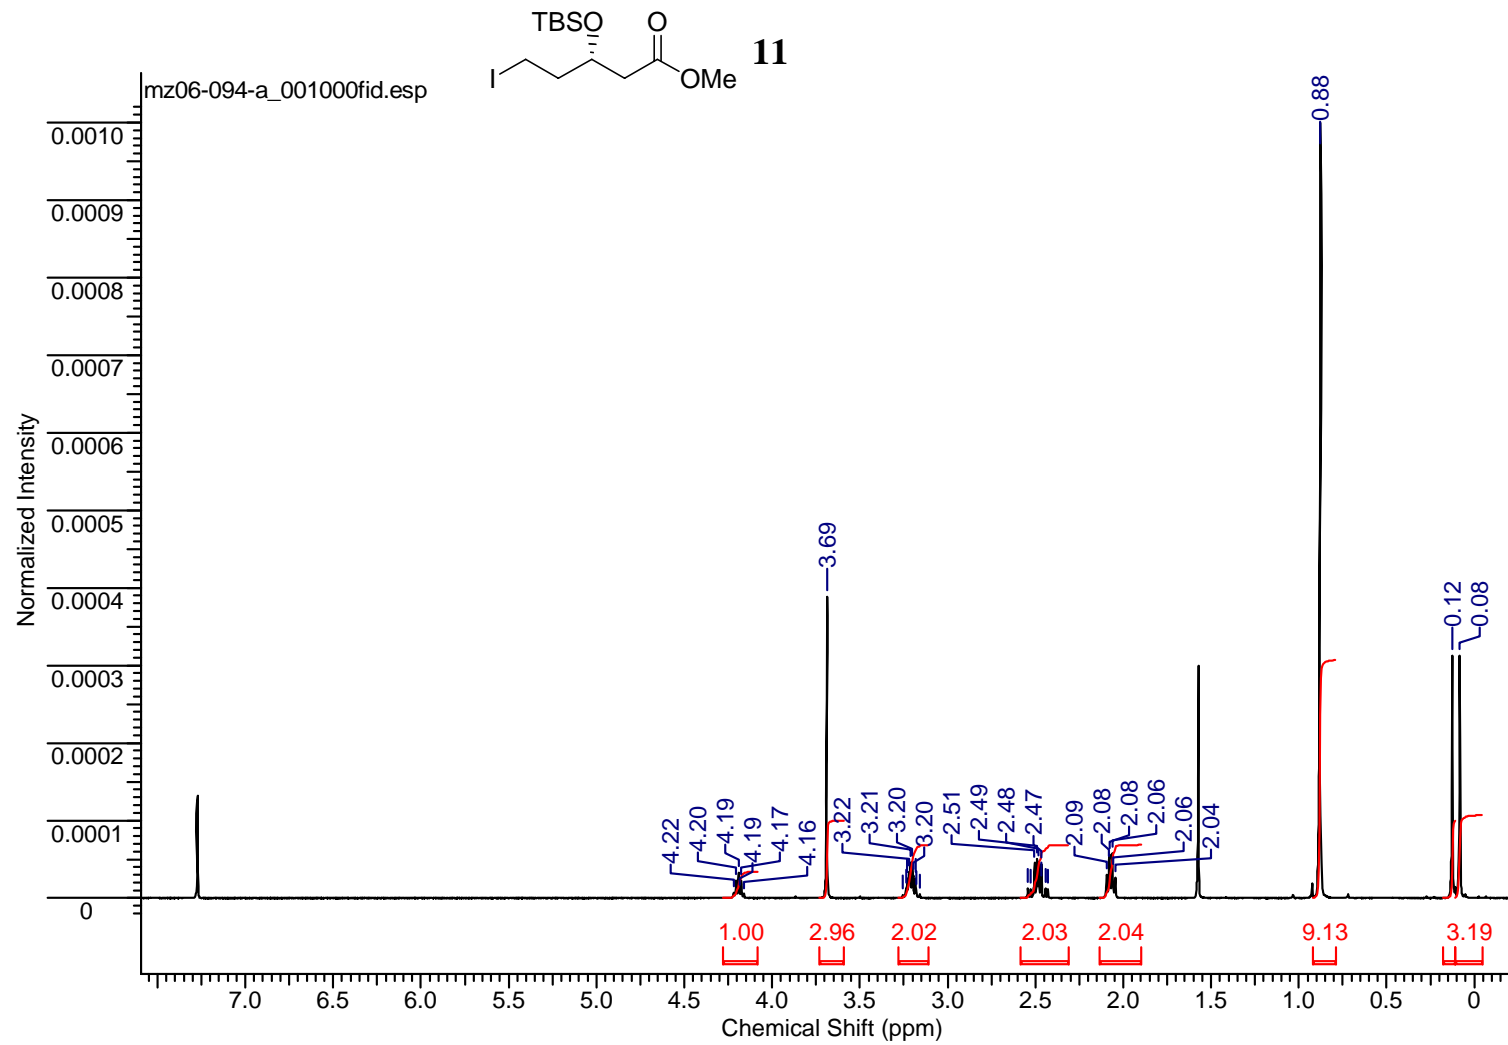

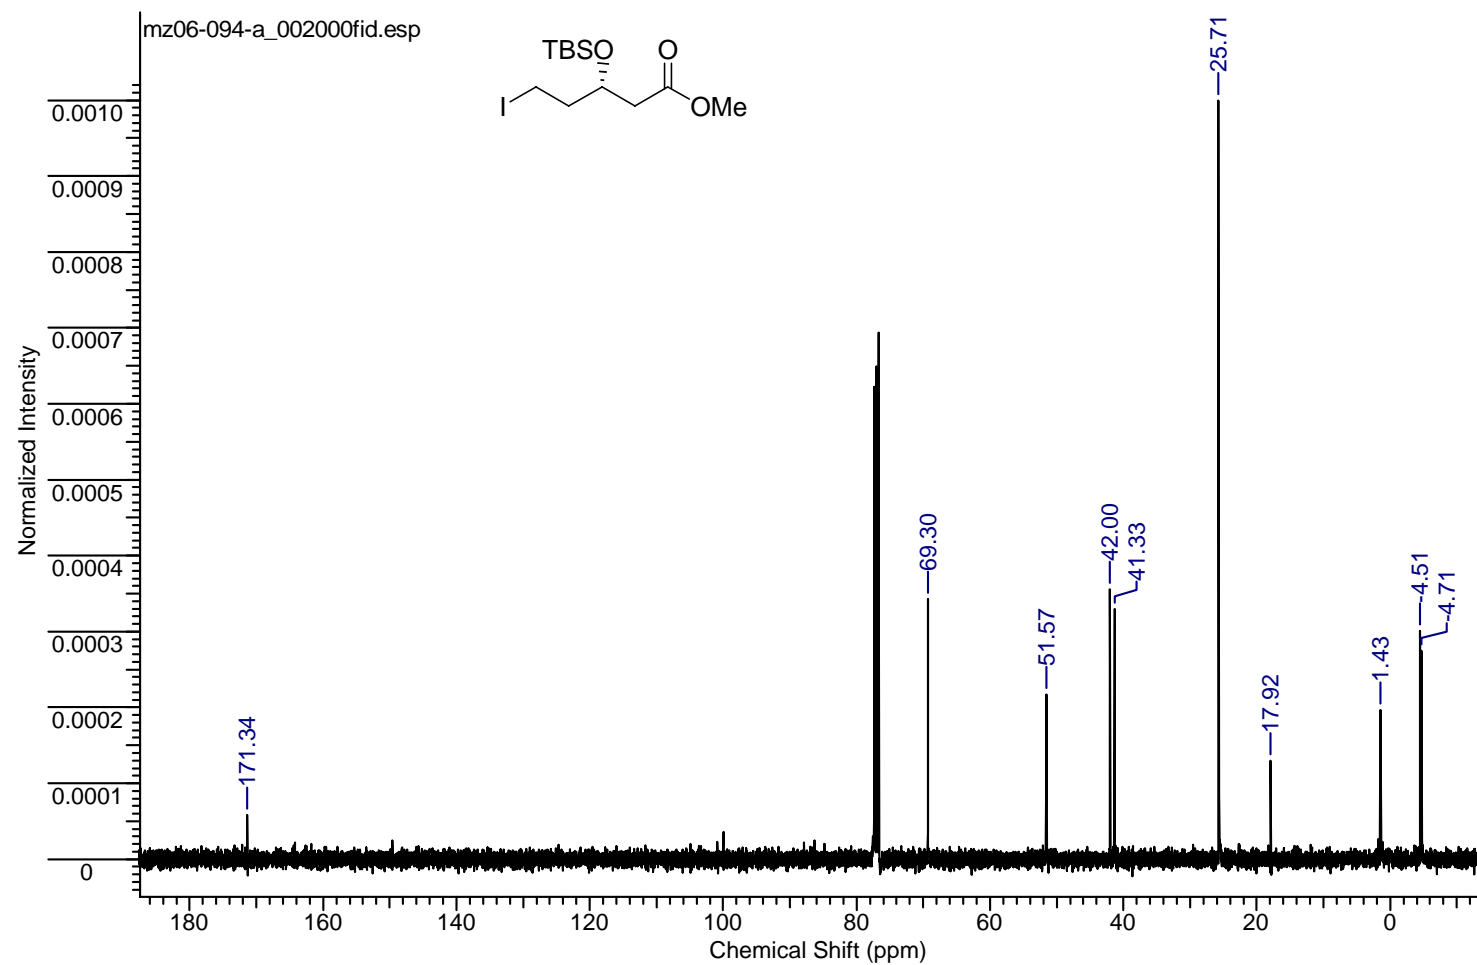

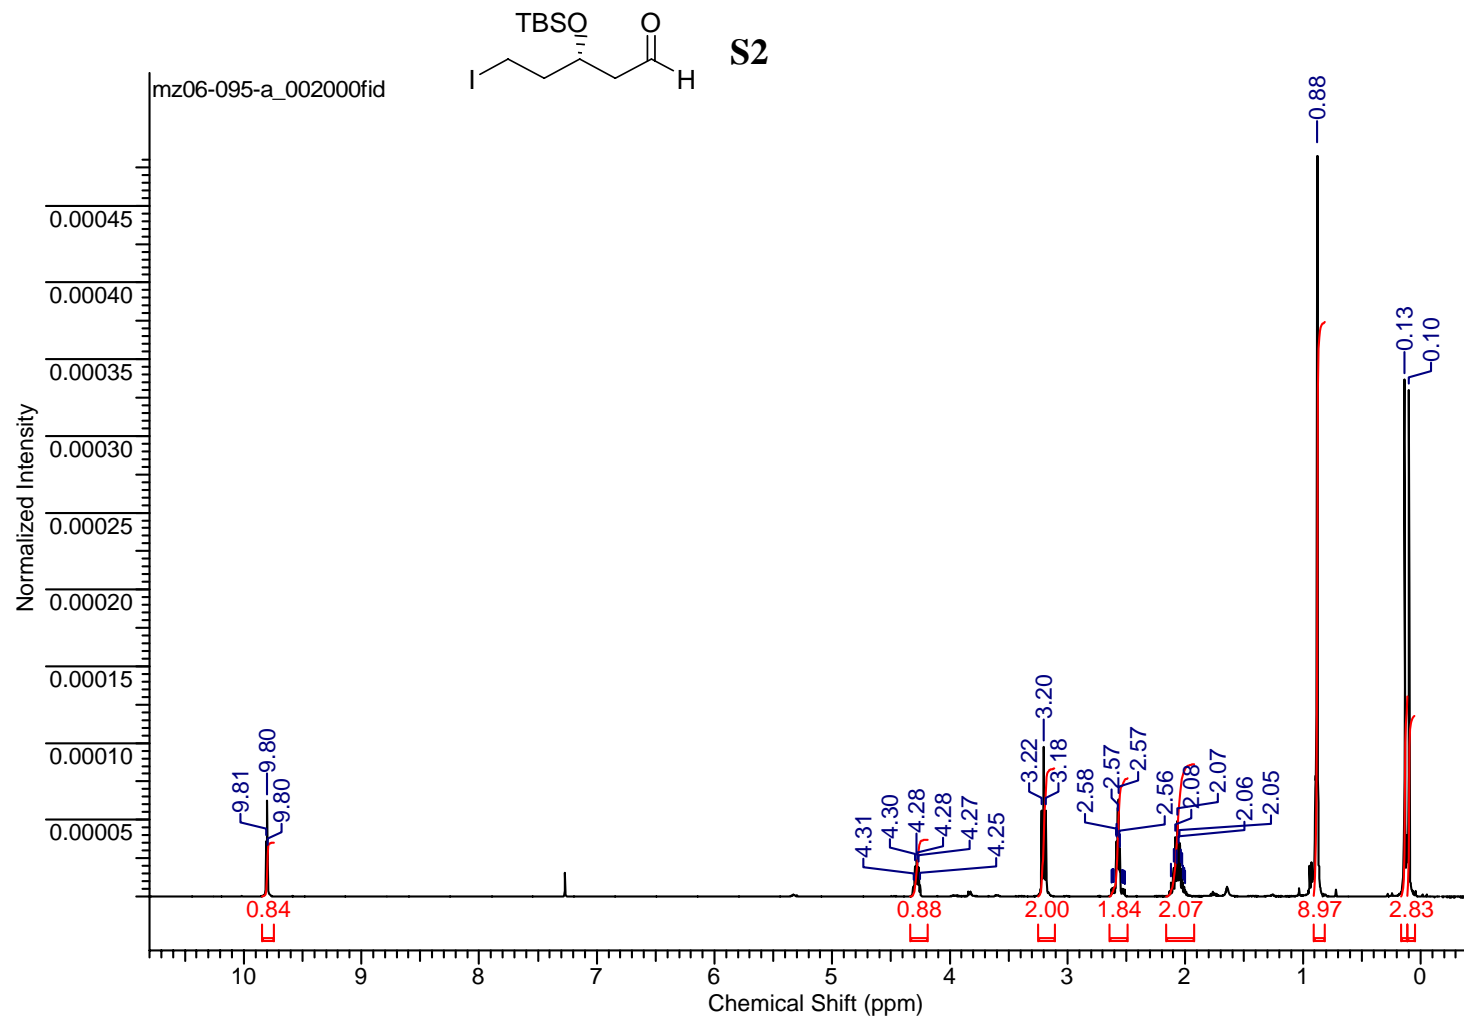

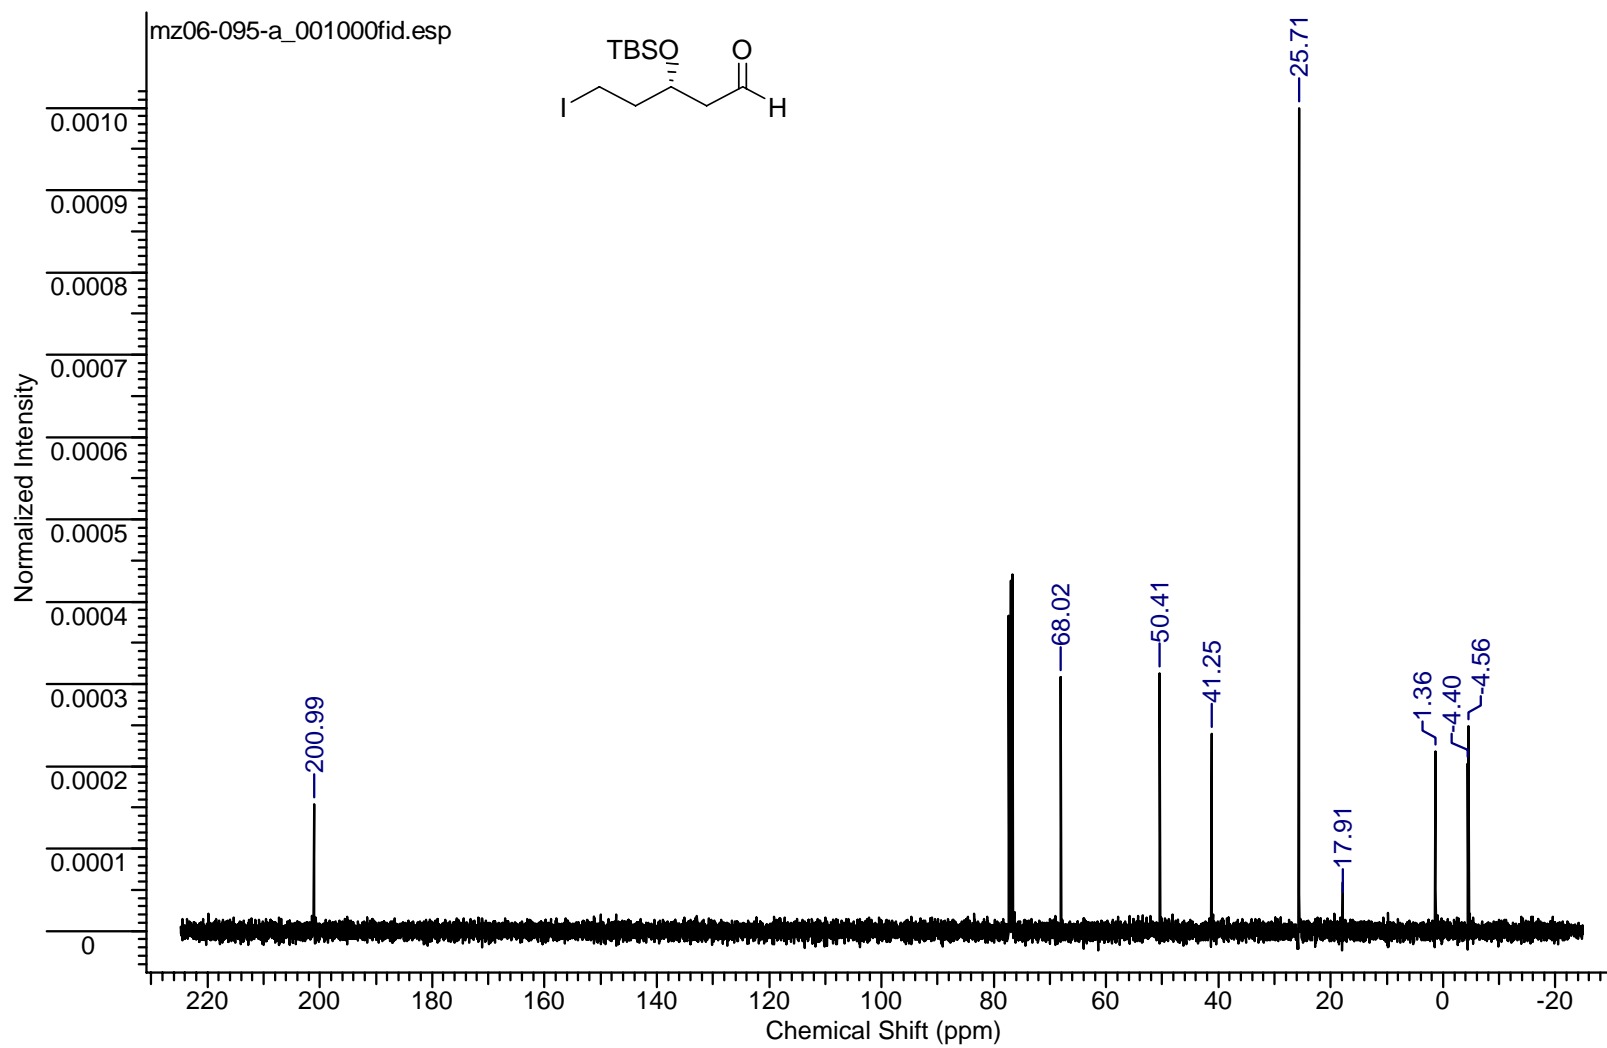

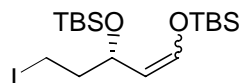

12

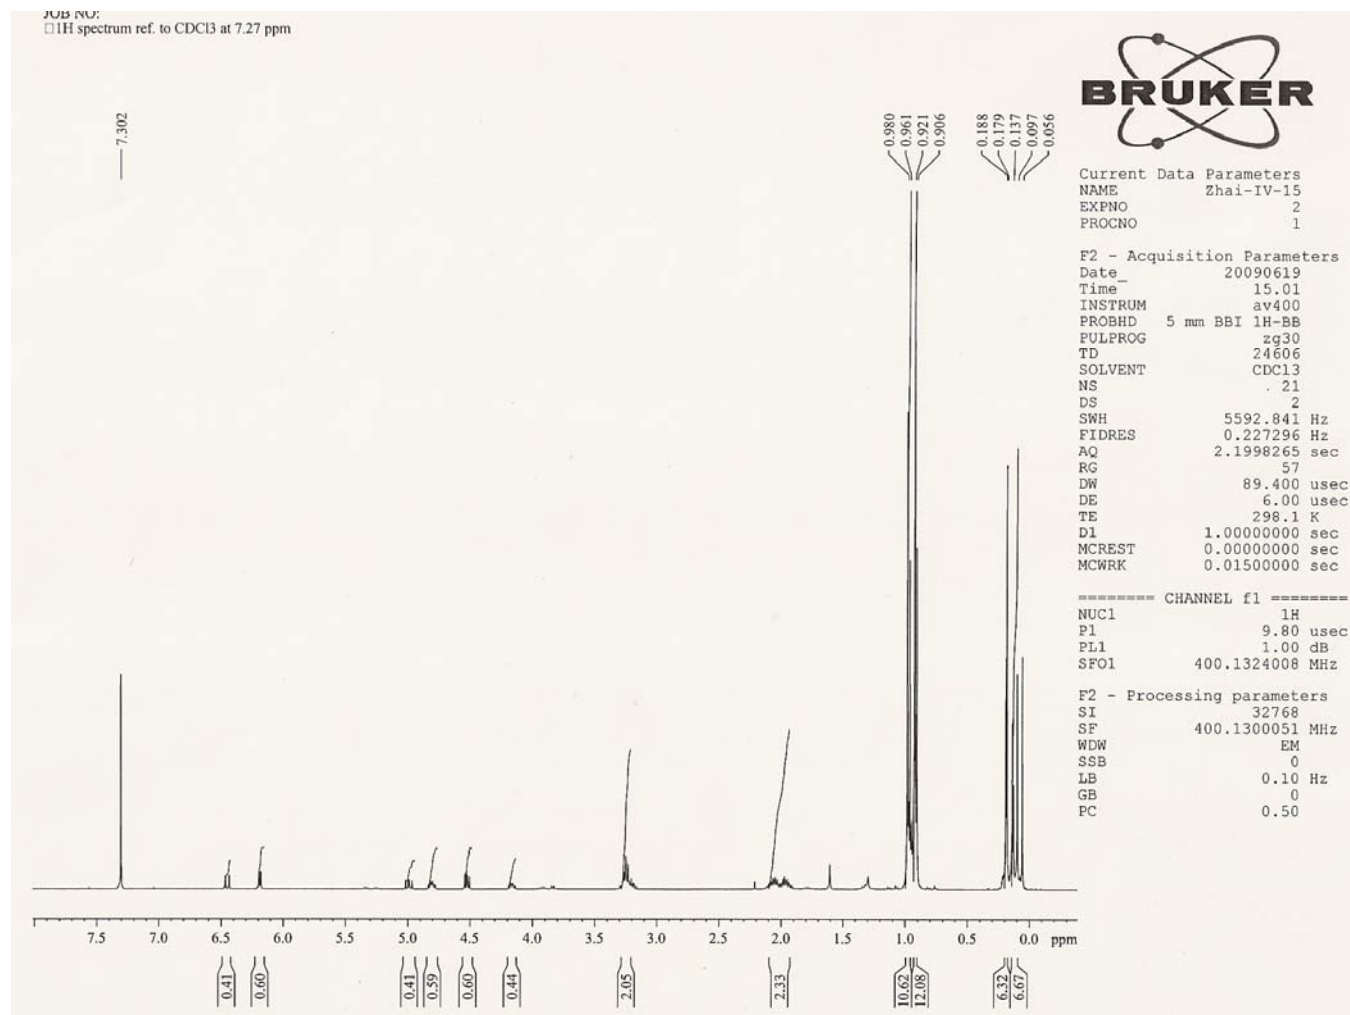

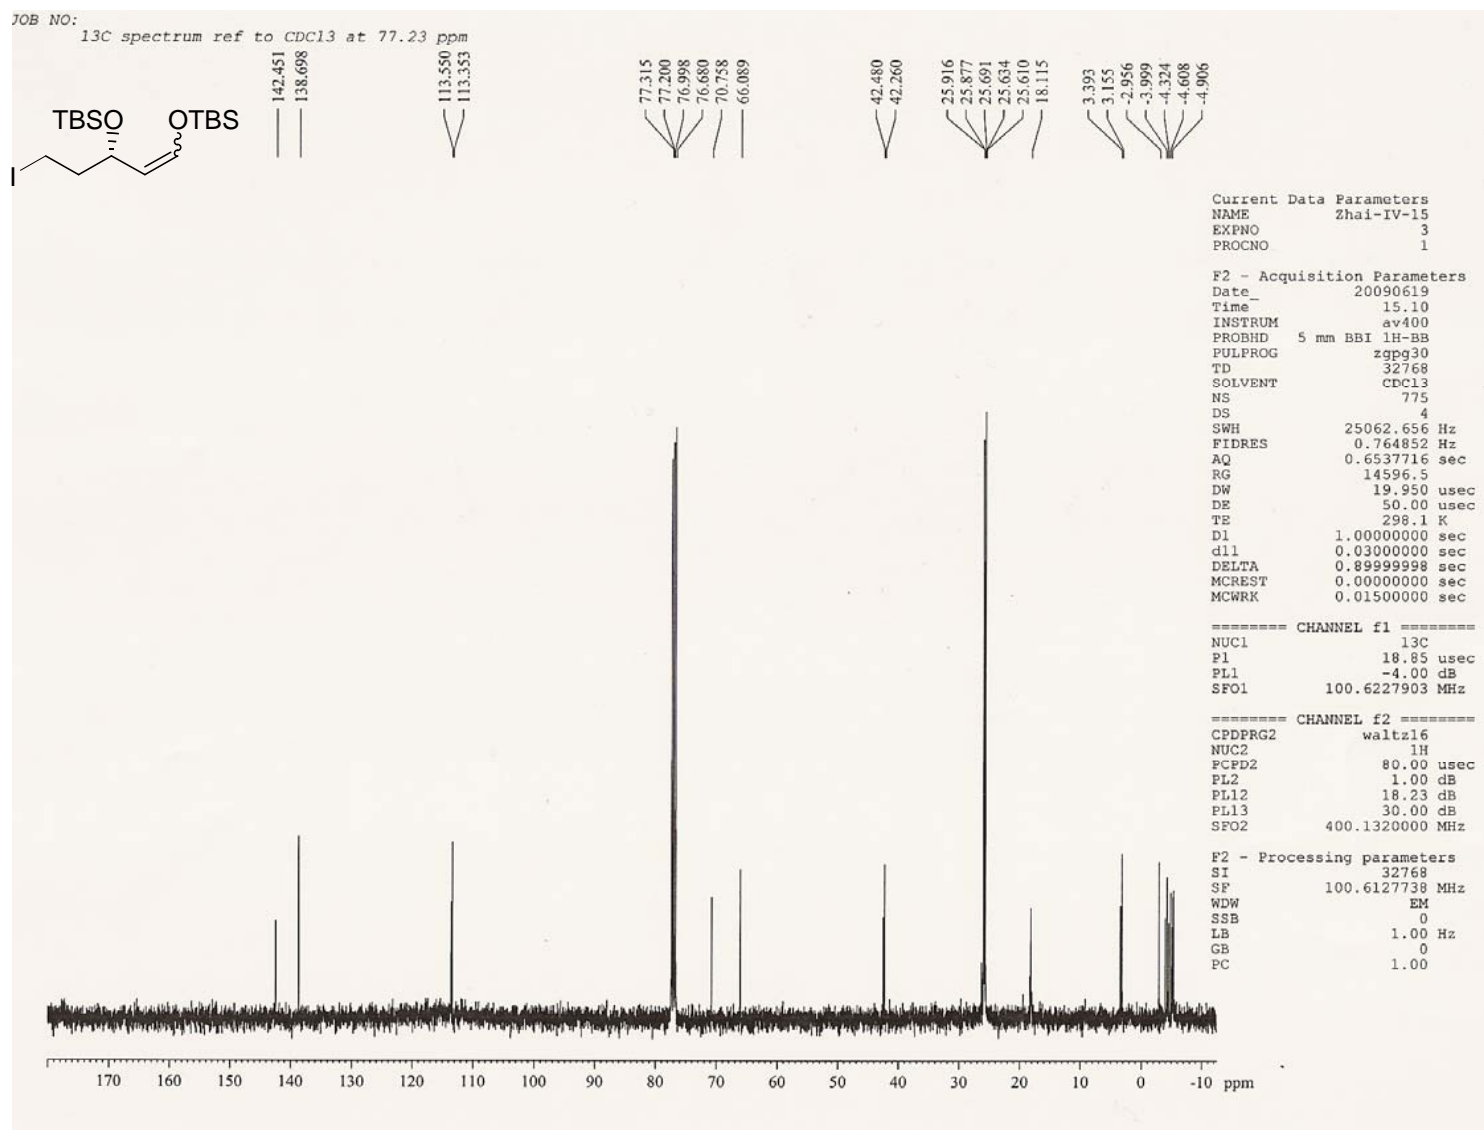

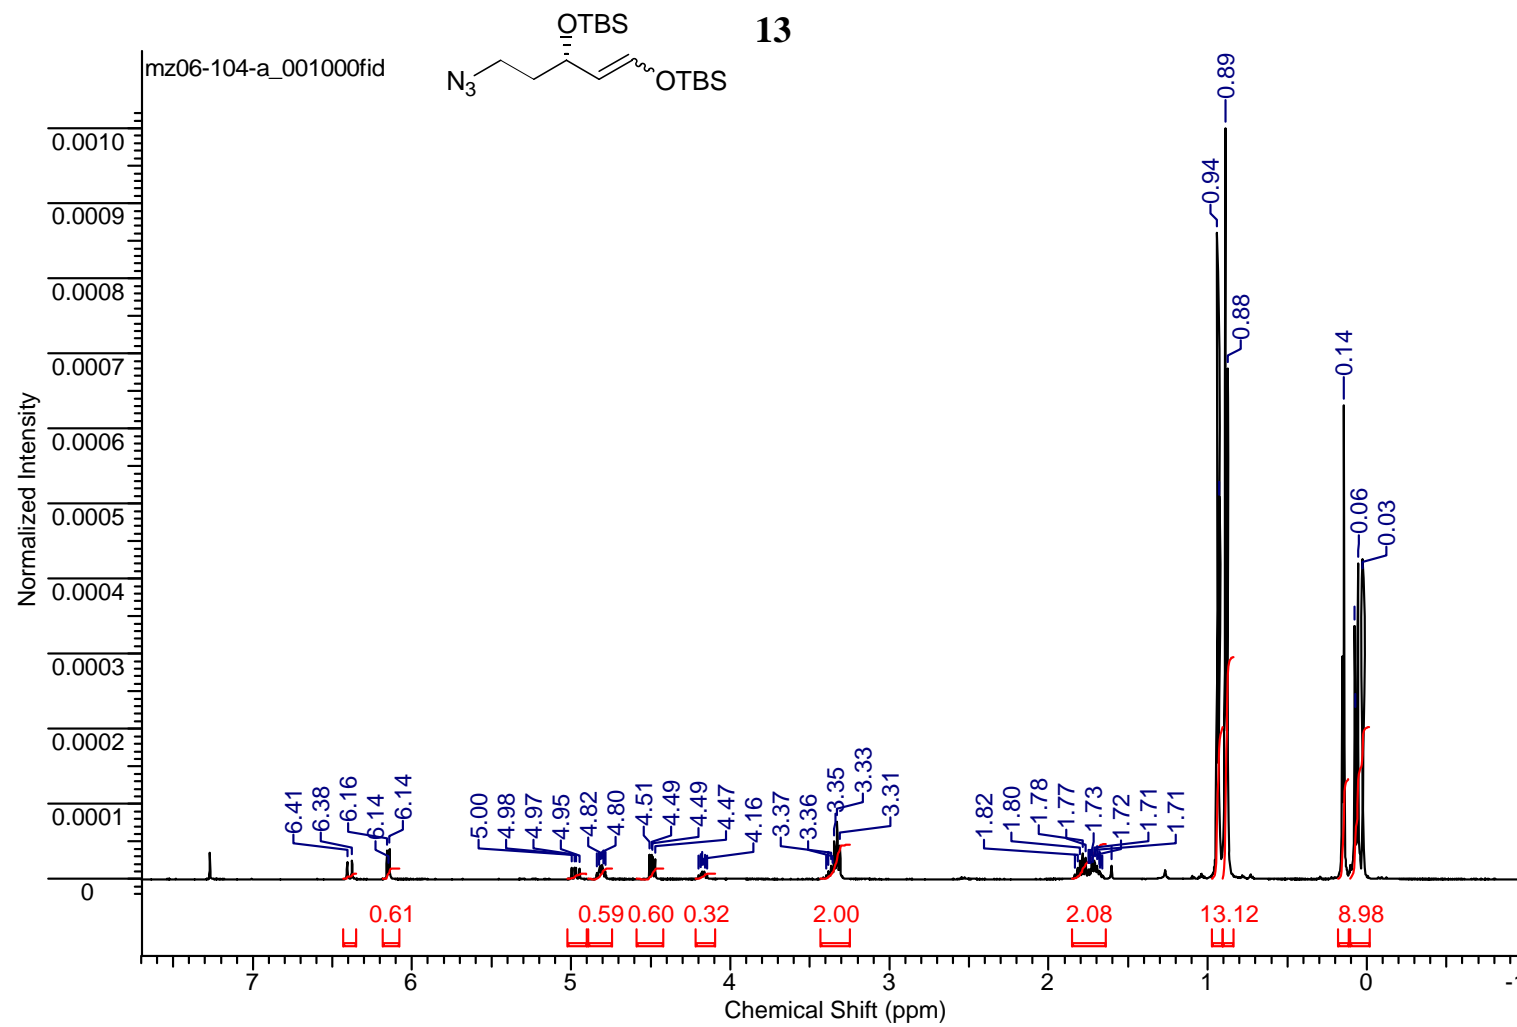

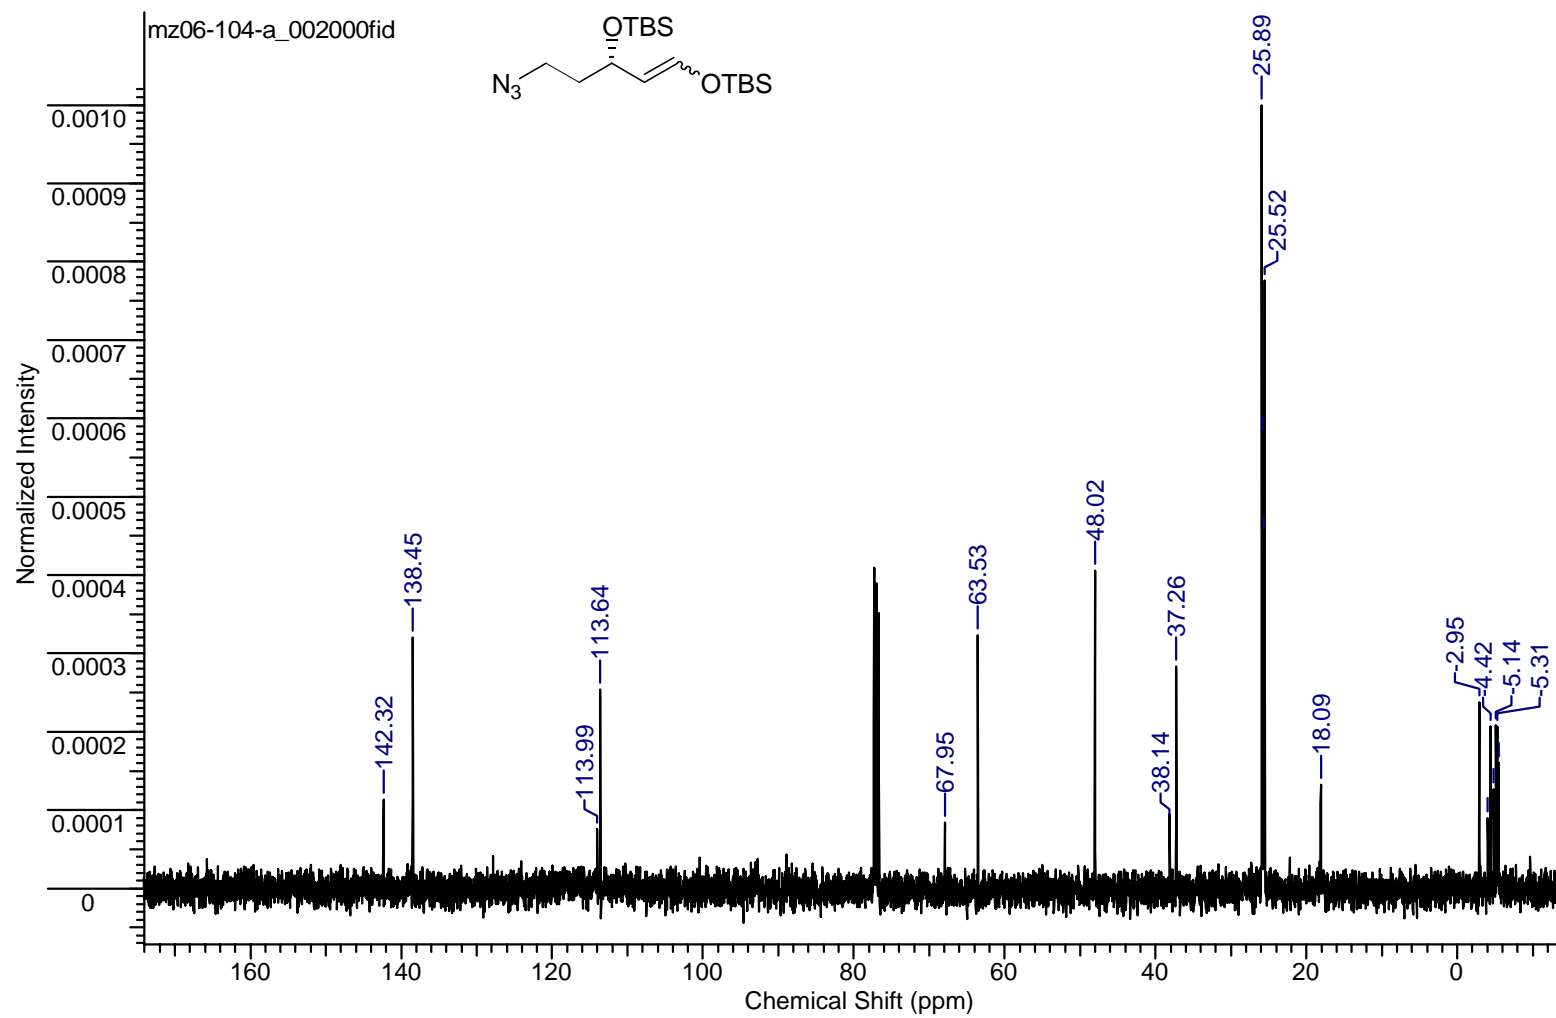

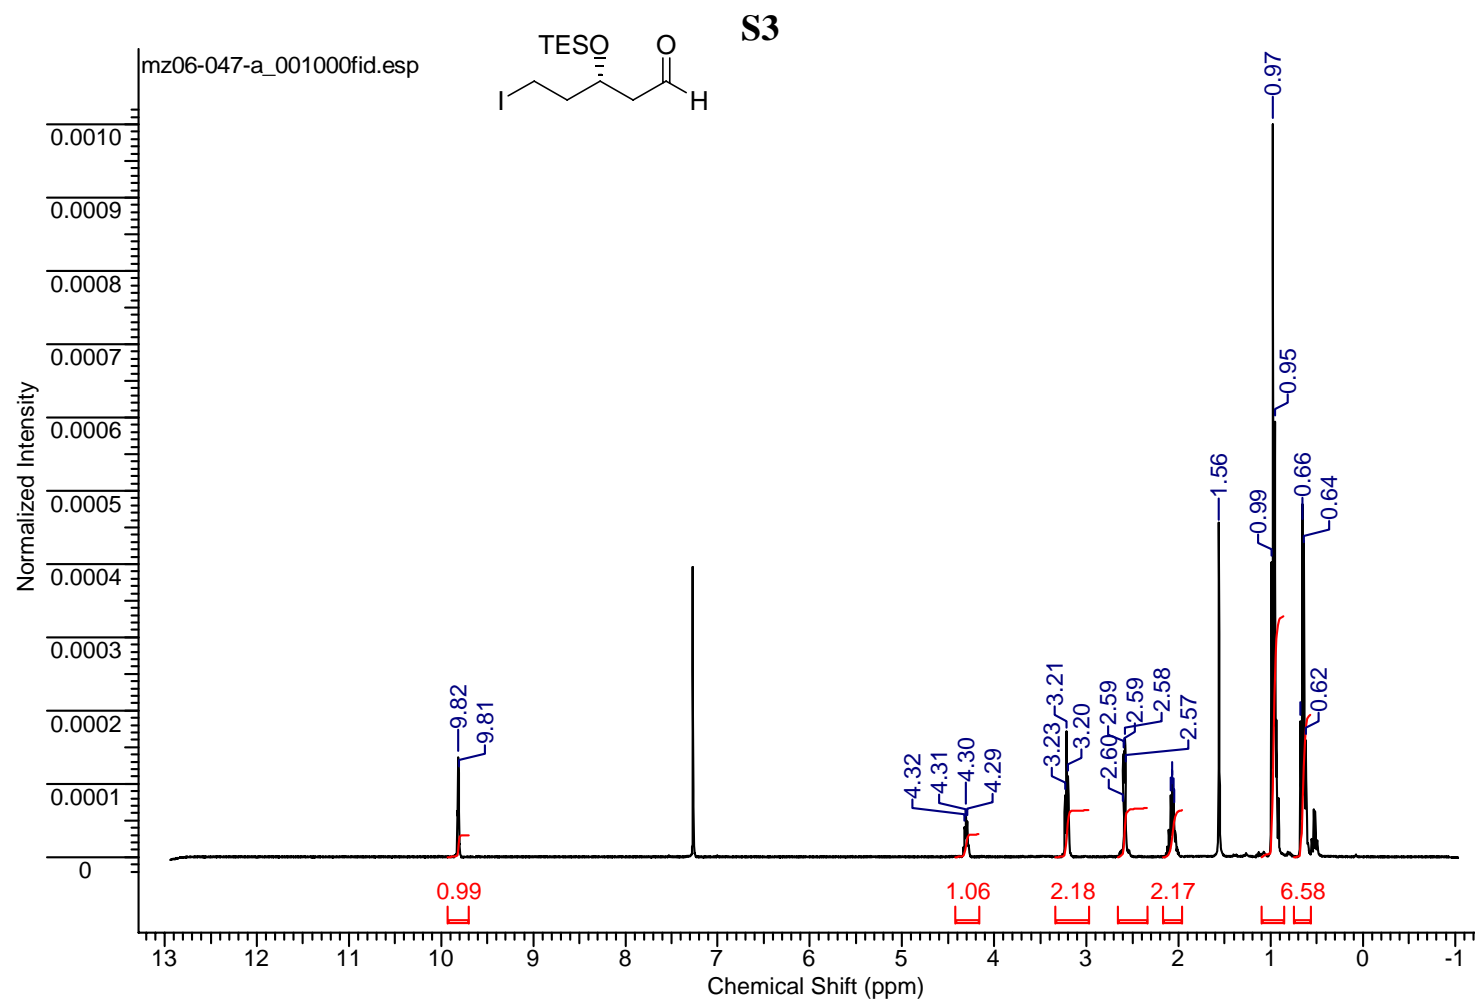

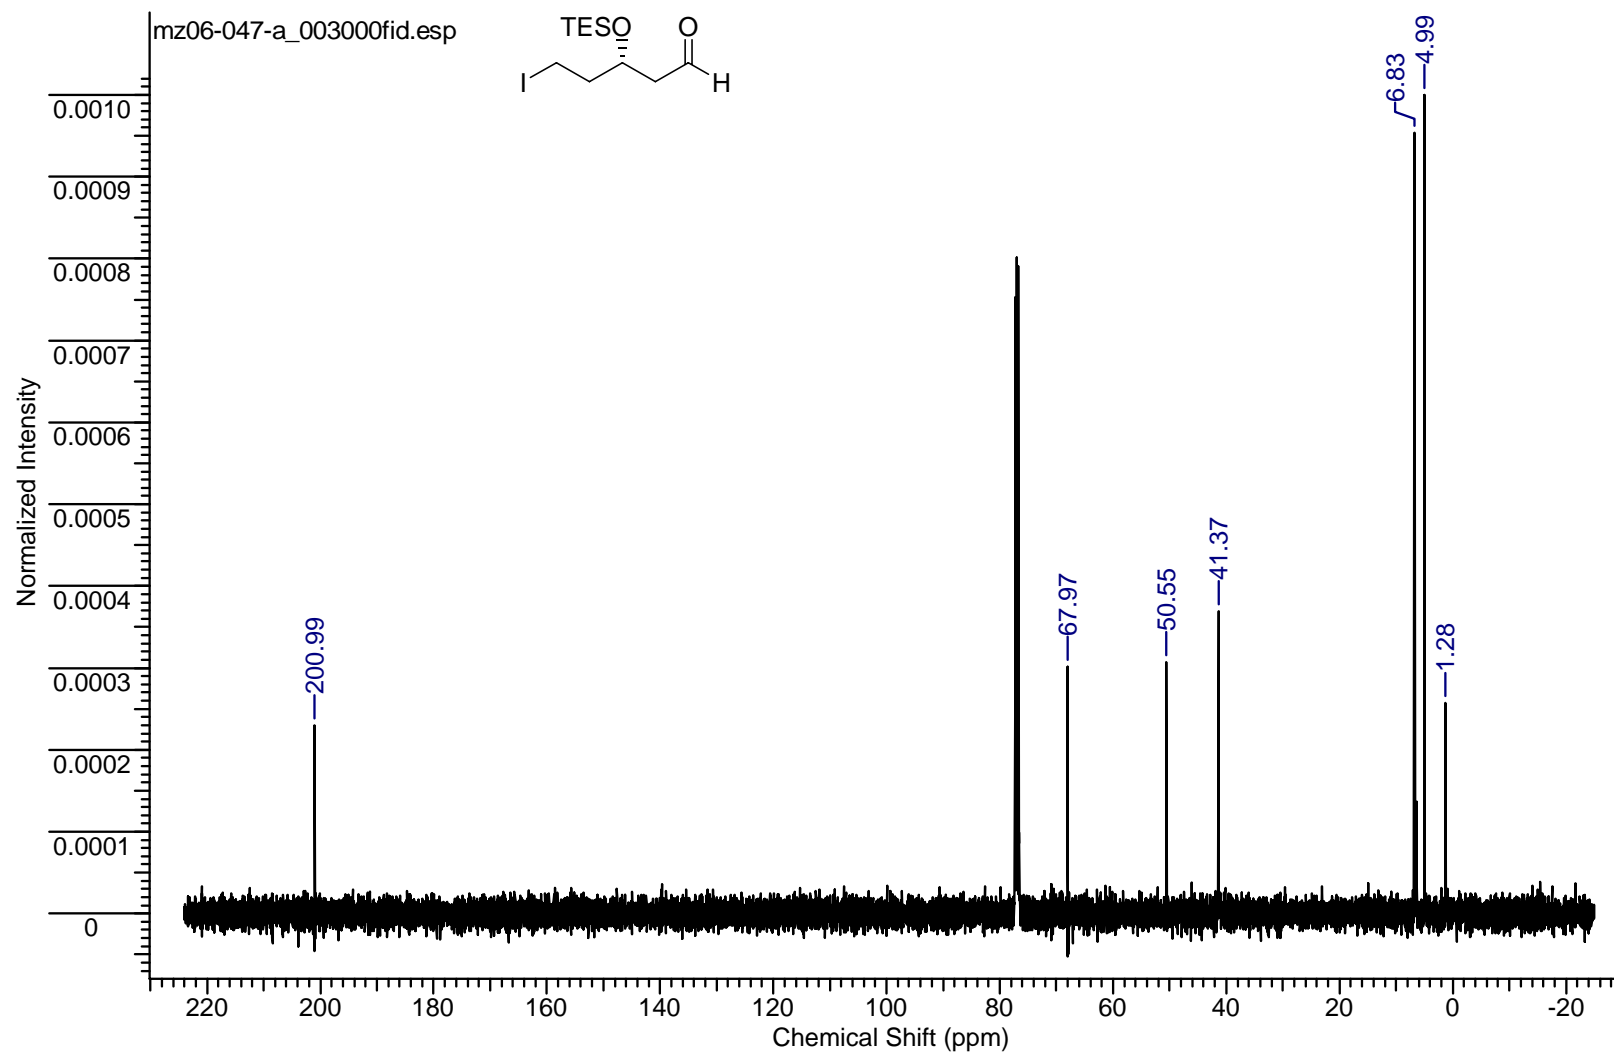

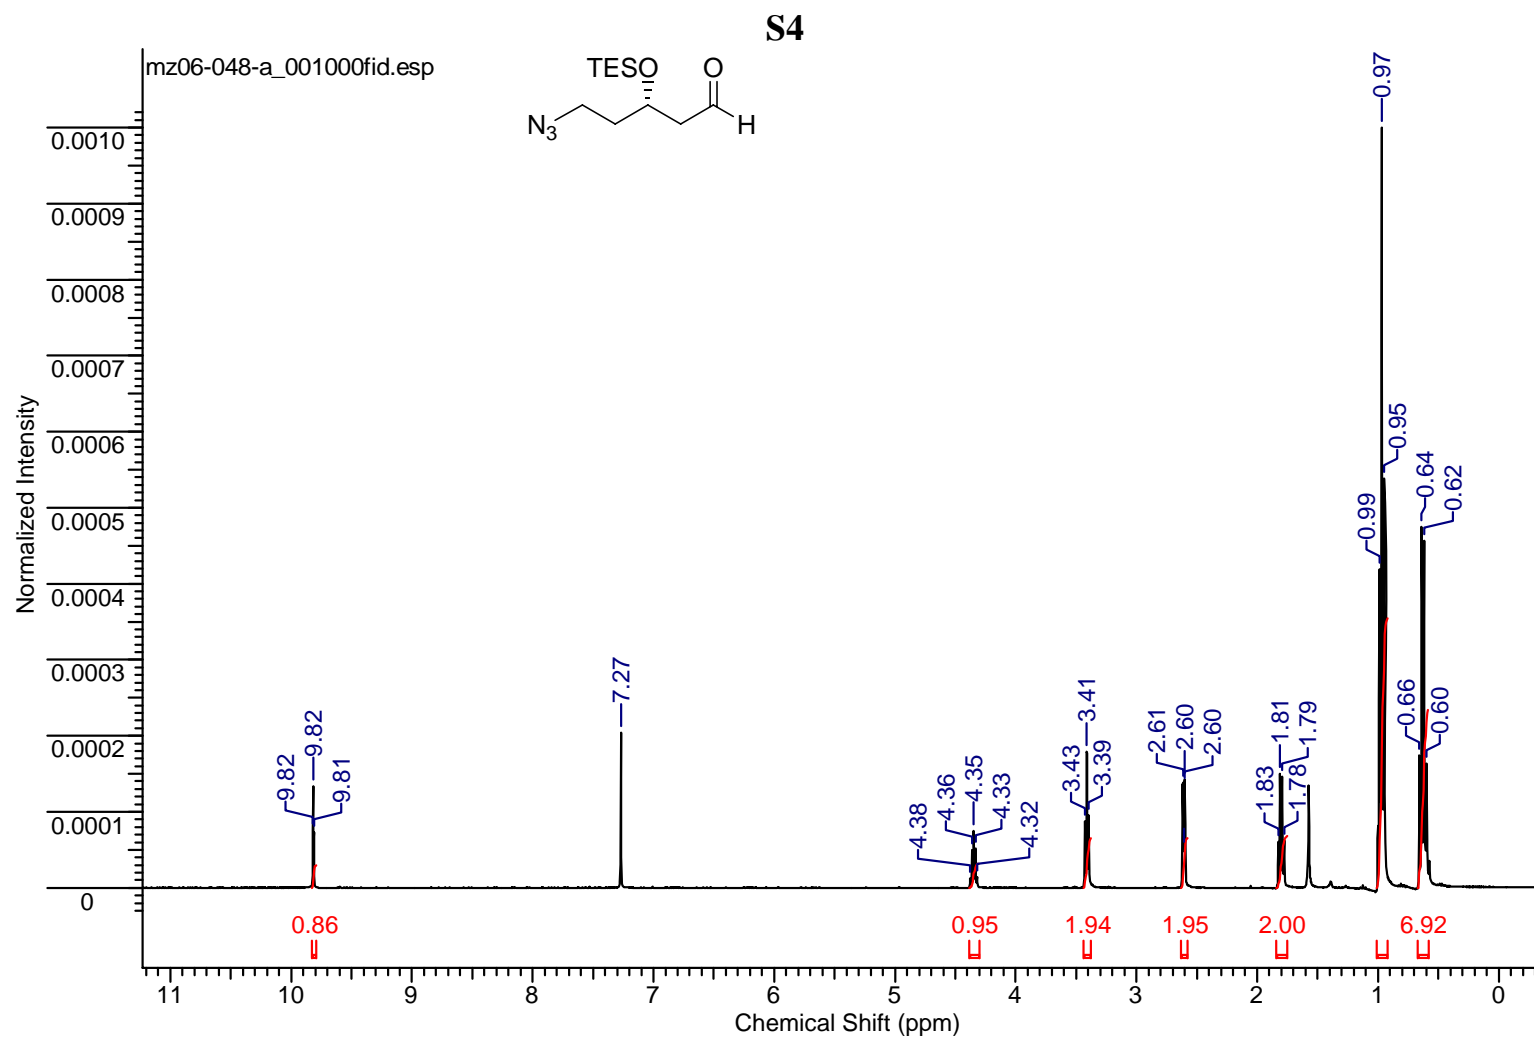

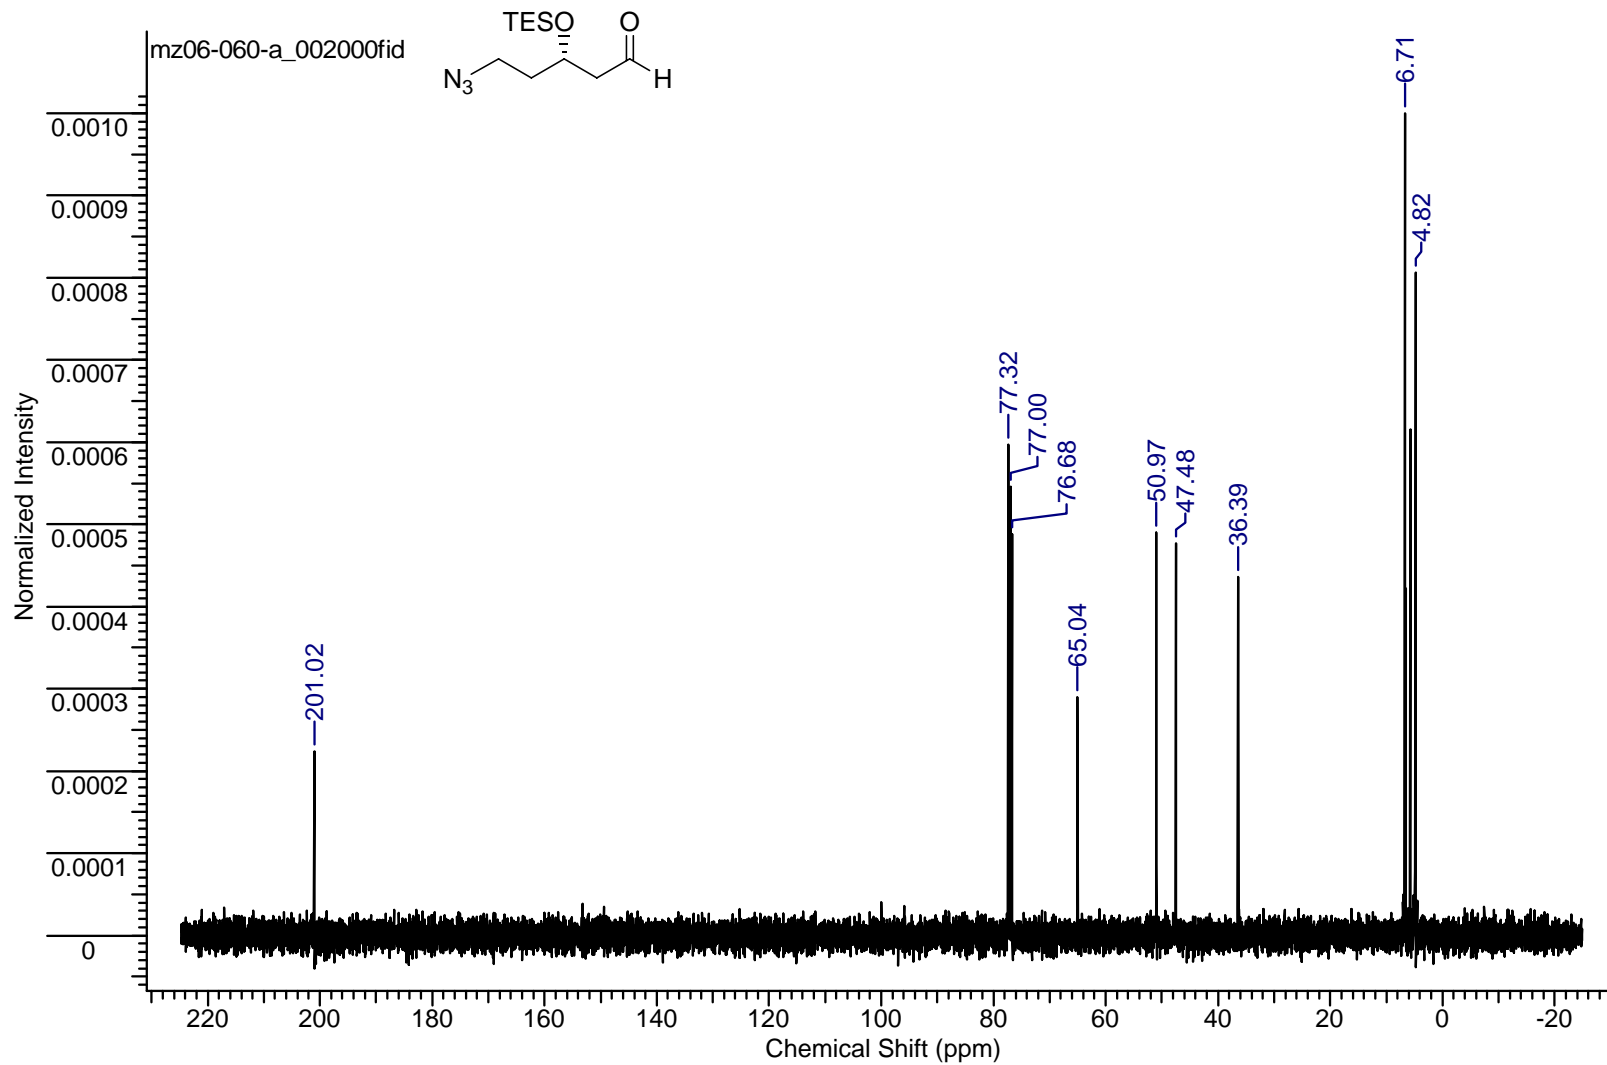

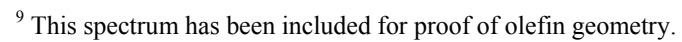

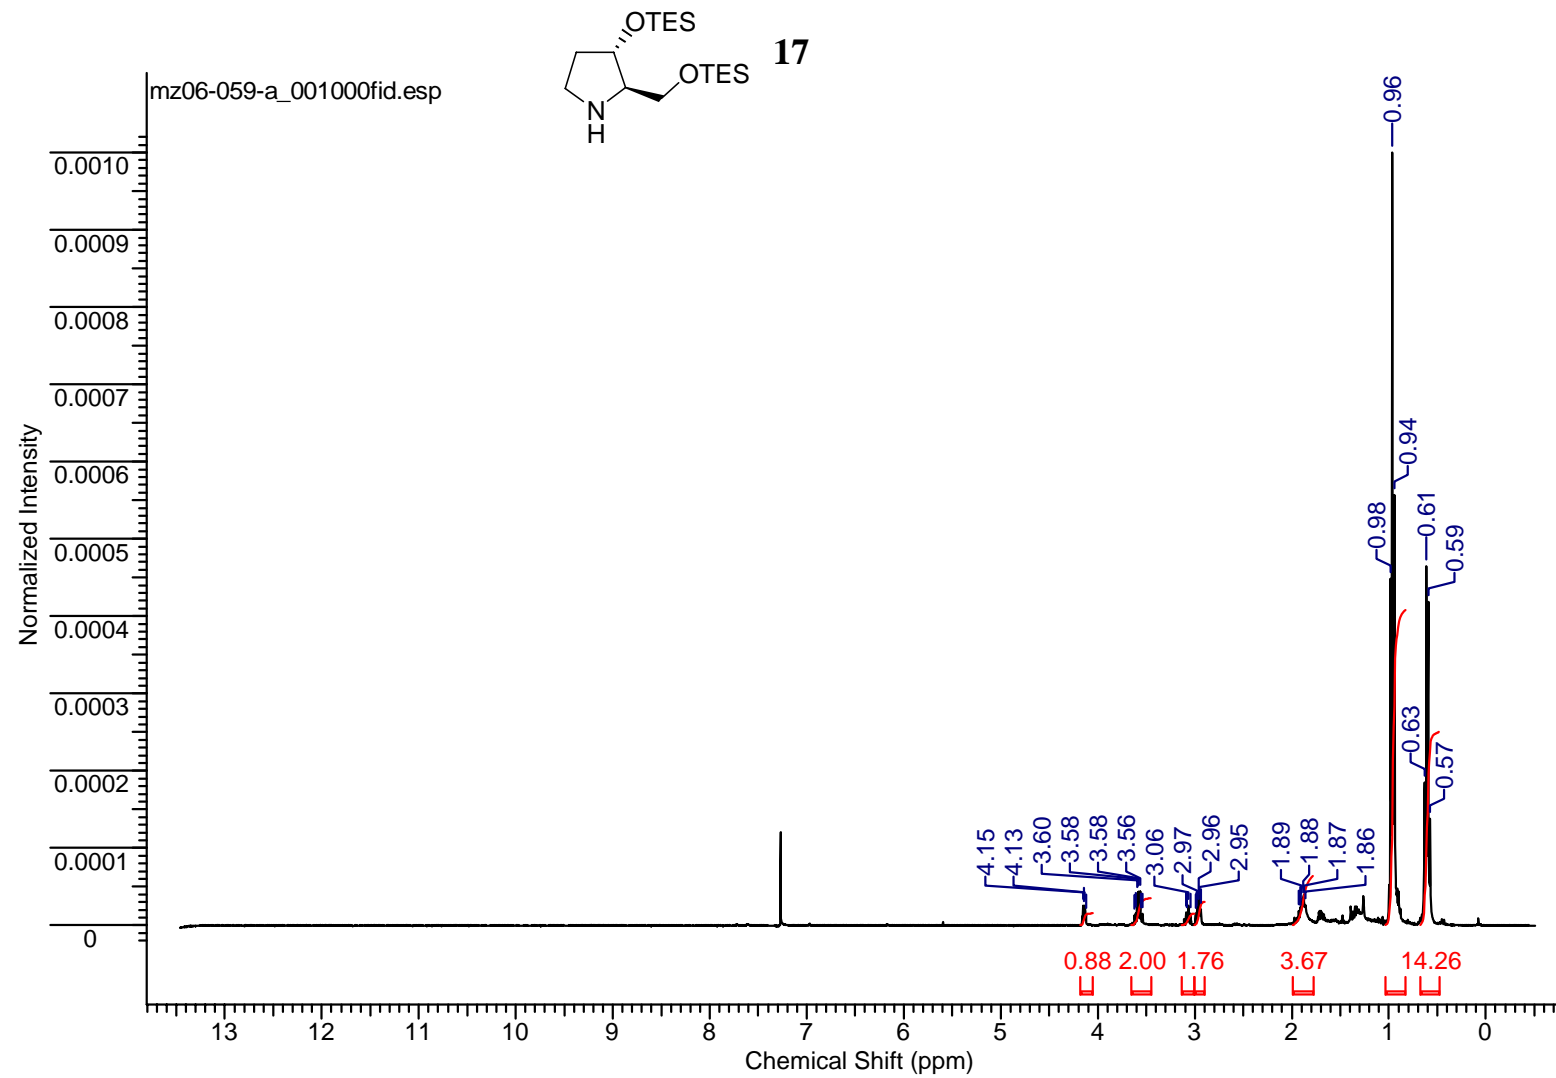

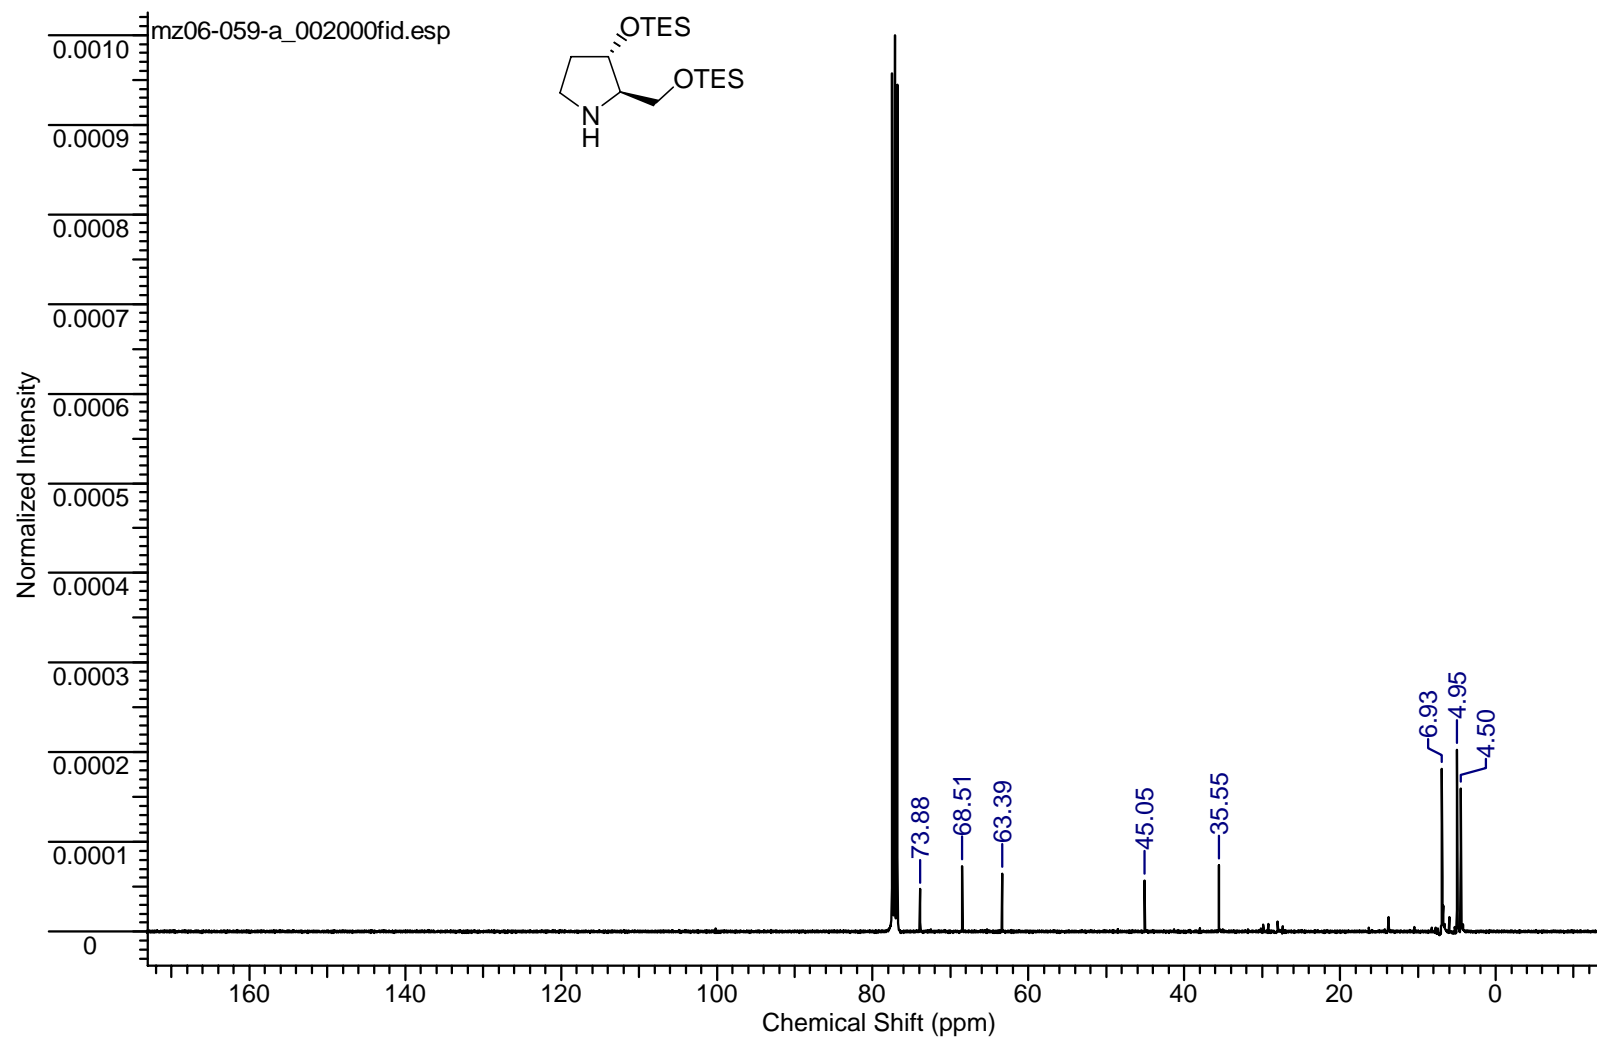

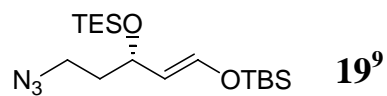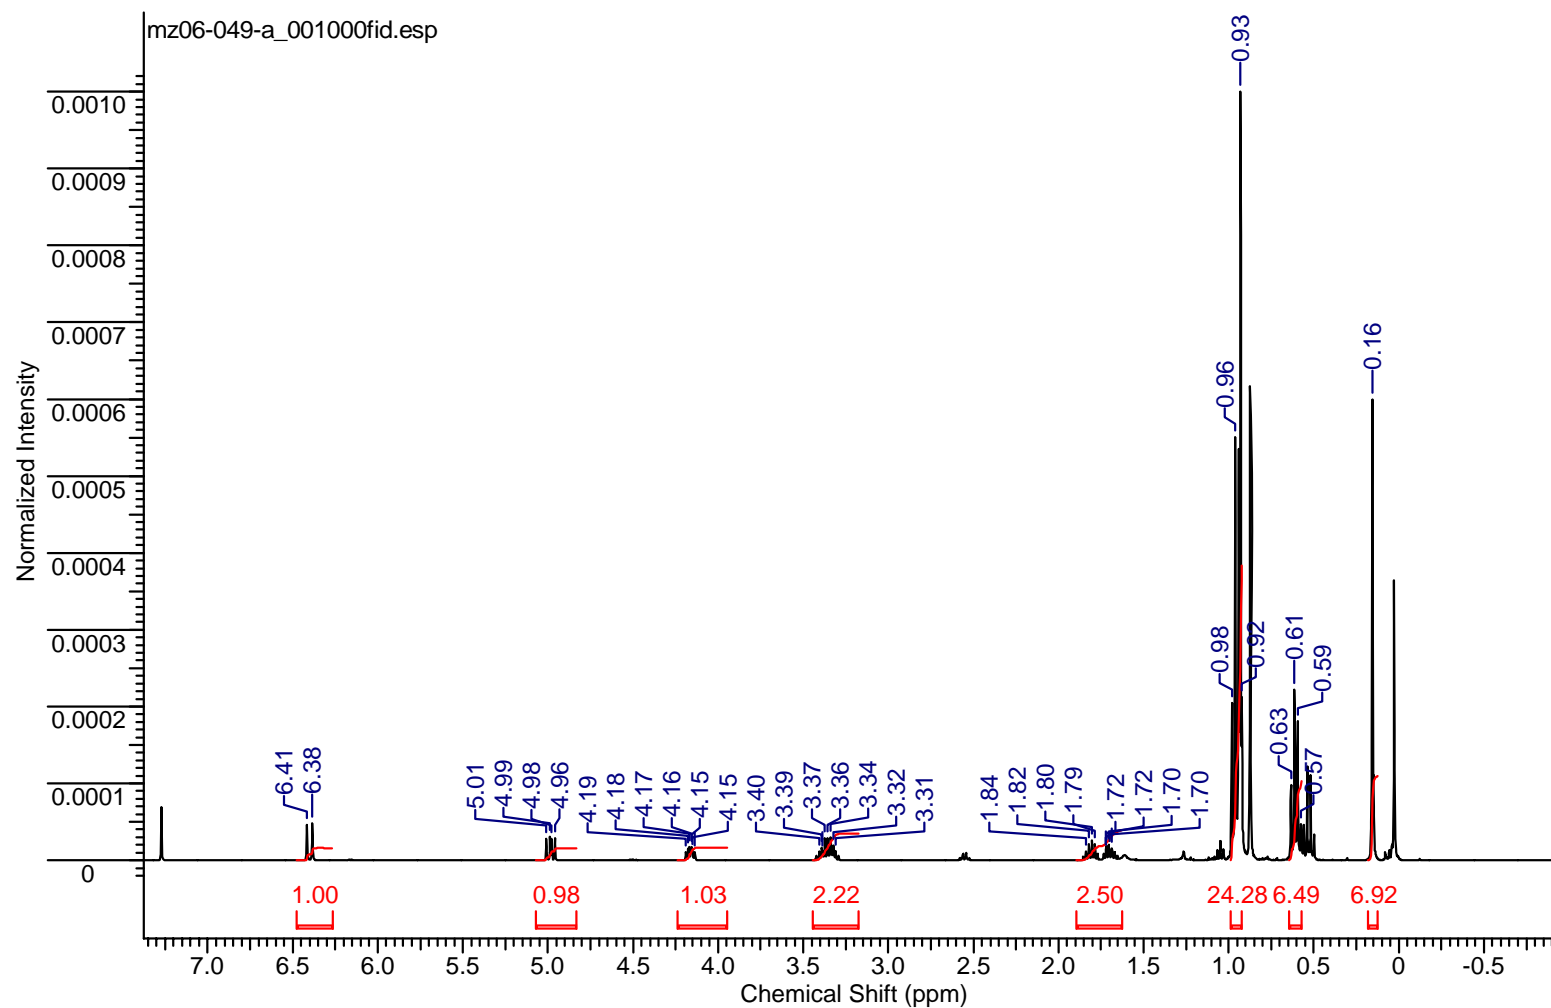

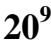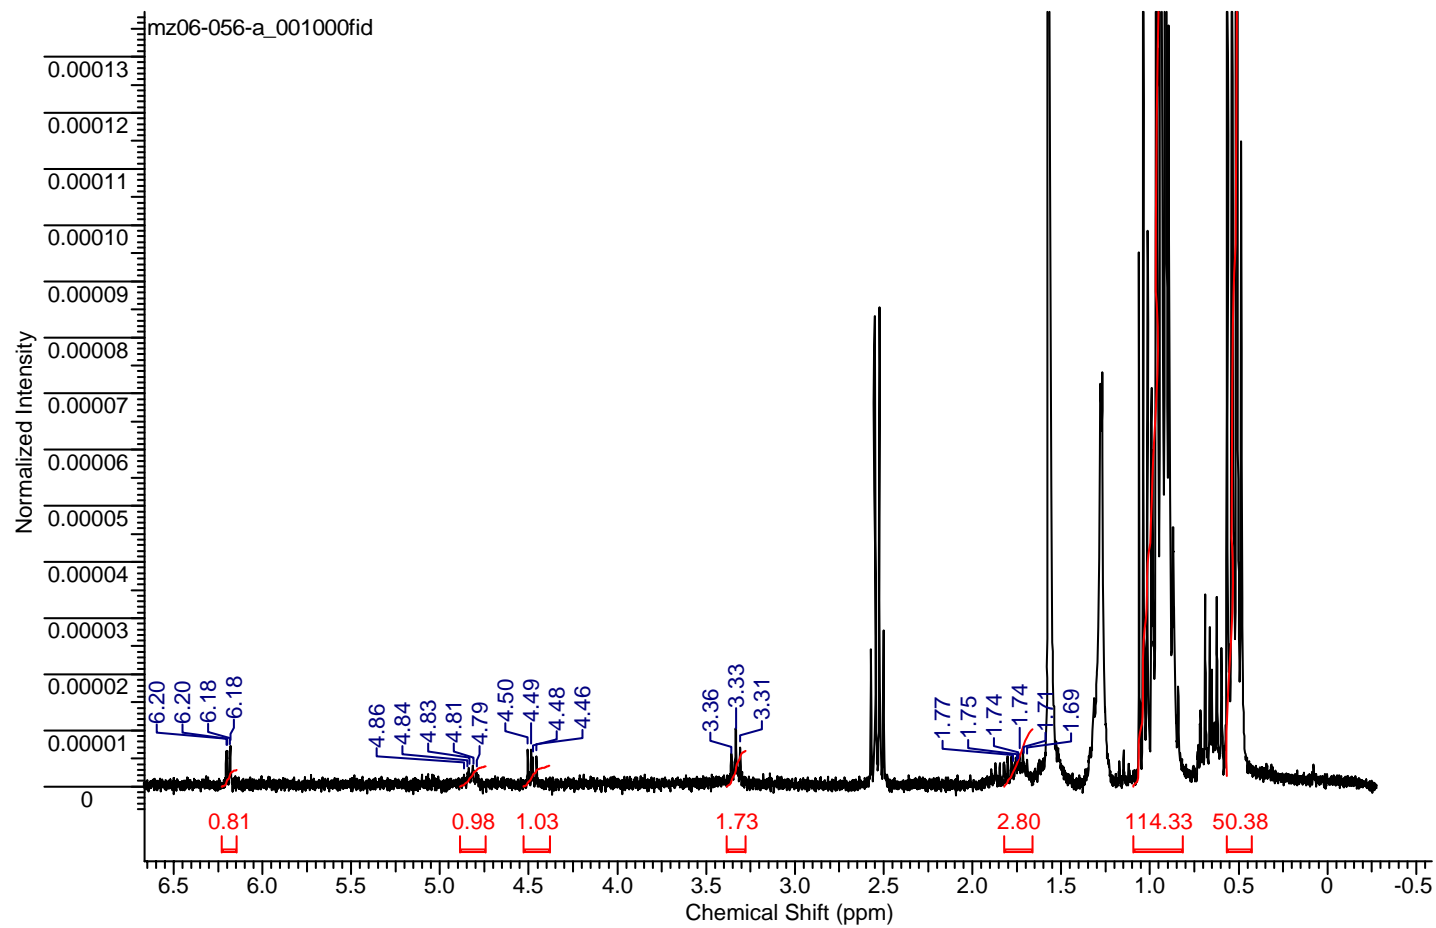

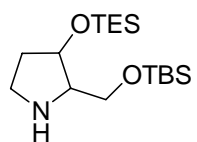

**21**

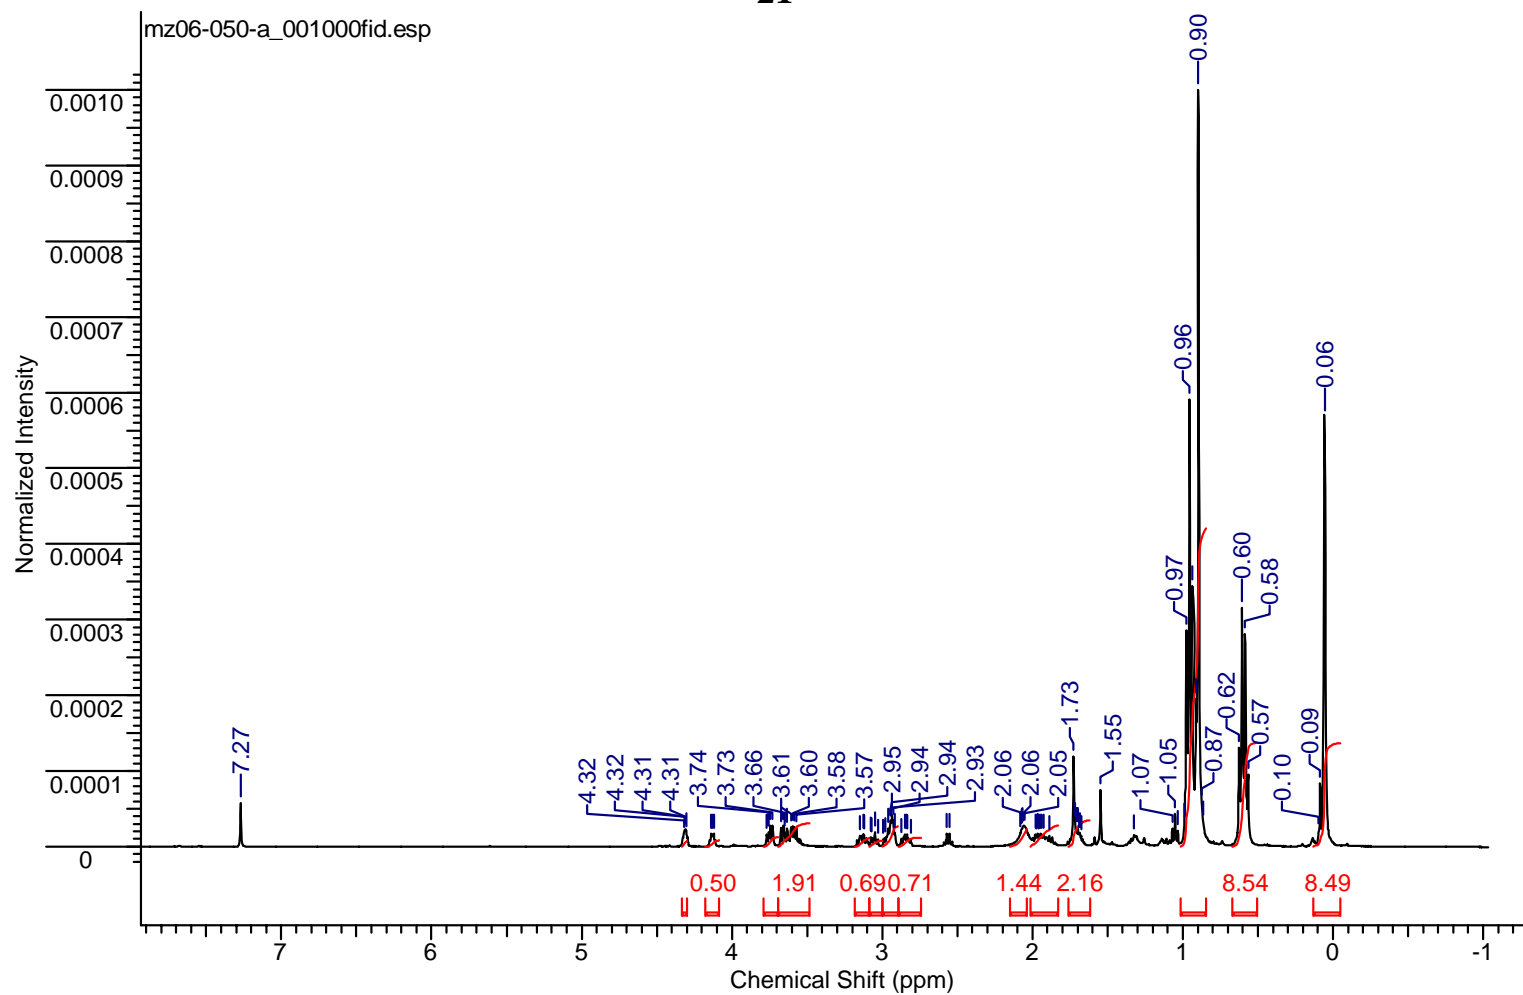

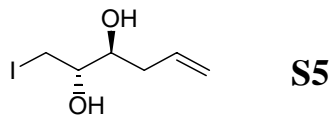

1H  
USO Bruker 400MHz 500 probe

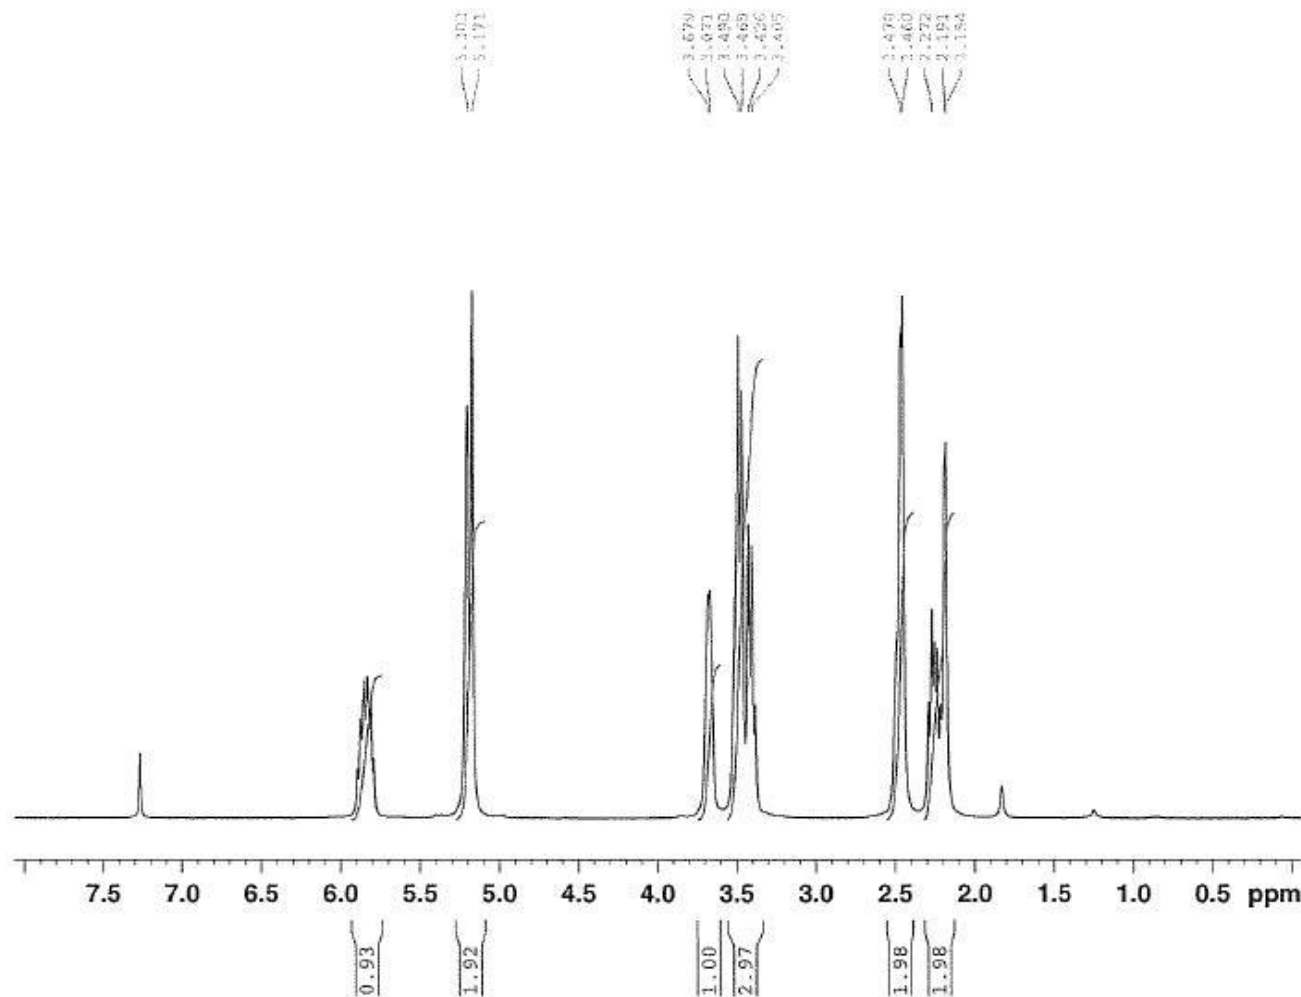

Current Data Parameters  
NAME Zhai-III-123  
EXPNO 1  
PROCNO 1

F2 - Acquisition Parameter  
Date\_ 20090303  
Time 15.31  
INSTRUM spect  
PROBHD 5 mm BBO BB-1H  
PULPROG zg30  
TD 32768  
SOLVENT CDCl3  
NS 7  
DS 2  
SMH 5592.841 Hz  
FIDRES 0.170680 Hz  
AQ 3.9295092 sec  
RG 64  
CH 89.400 us  
DE 6.00 us  
TE 298.2 K  
D1 1.00000000 sec  
HCREST 0.00000000 sec  
HCHMK 0.01500000 sec

----- CHANNEL f1 -----  
NUC1 1H  
P1 17.00 us  
PL1 1.00 dB  
SFO1 400.1926012 MHz

F2 - Processing parameters  
SI 32768  
SF 400.1900107 MHz  
WDW EM  
SSB 0  
LB 0.50 Hz  
GB 0  
PC 1.00

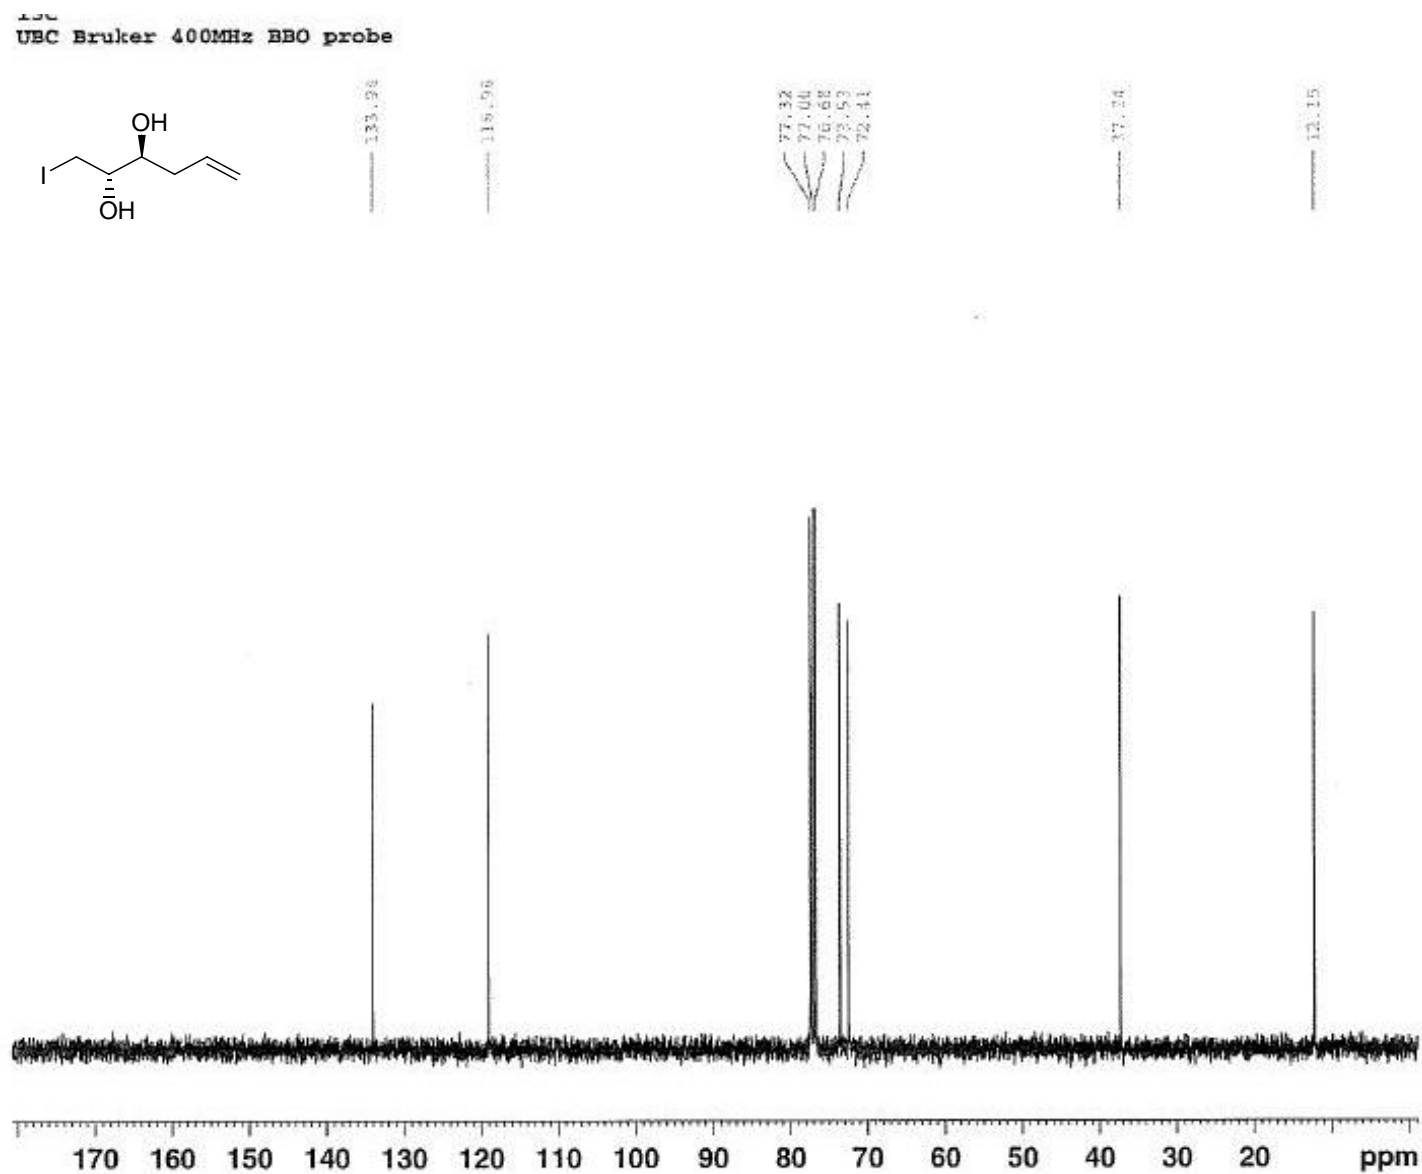

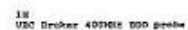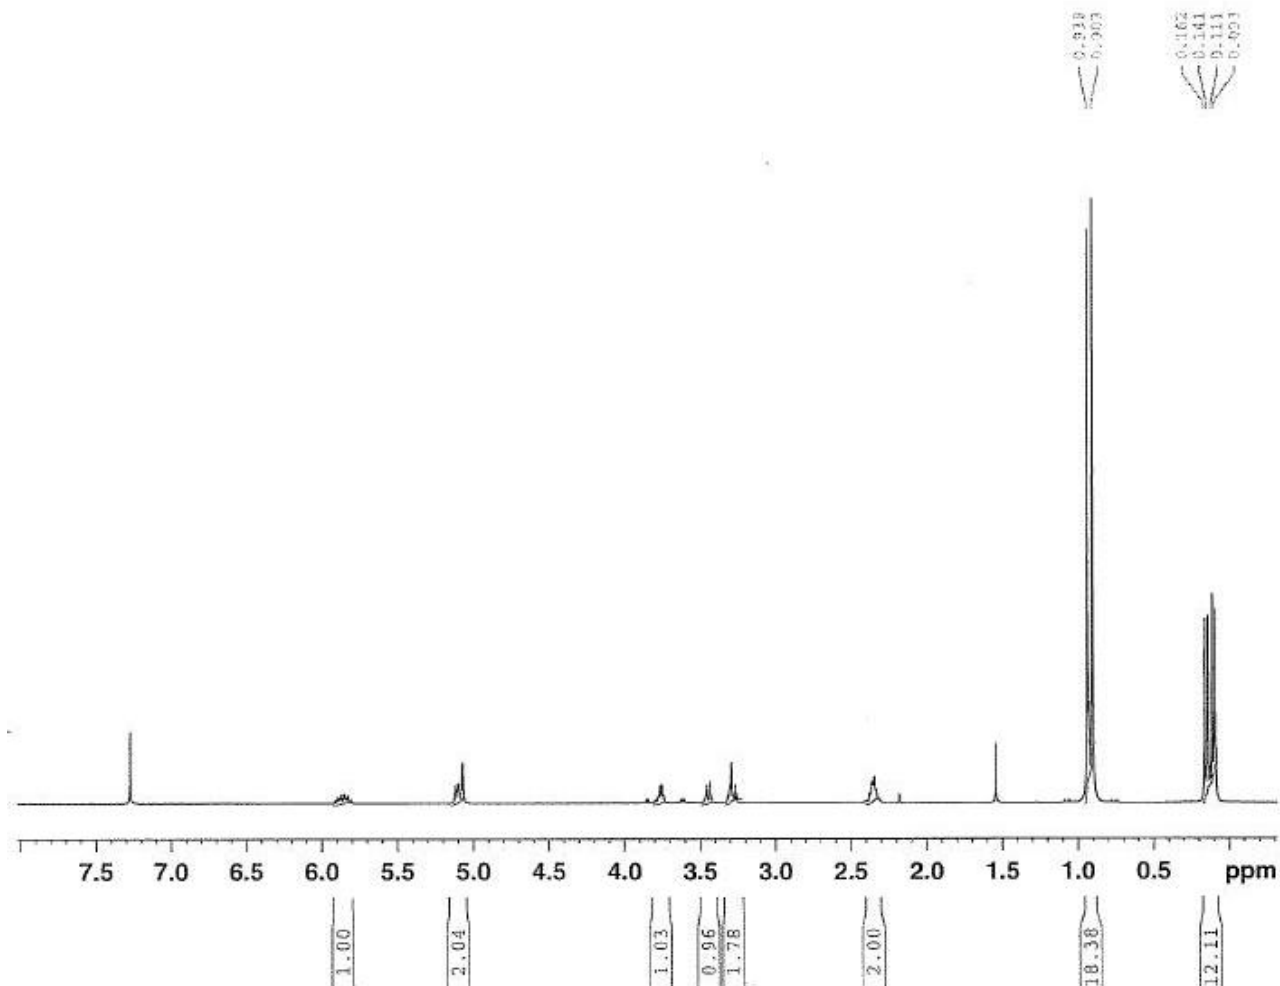

```
Current Data Parameters
NAME      Zhai-III-131
EXPNO     1
PROCNO    1
```

```

F2 - Acquisition Parameter
Date_      20090316
Time       14.24
INSTRUM    spect
PROBHD     5 mm BBO BB-1H
PULPROG    zg30
TD          32768
SOLVENT    CDCl3
NS          10
DS          2
SWH         5592.841 Hz
FIDRES     0.170580 Hz
AQ          2.9295092 sec
RG          203.2
DE          89.400 uS
TW          6.00 uS
TE          298.3 K
D1          1.00000000 sec
MCREST     0.00000000 sec
MCWRR      0.01500000 sec

```

```
***** CHANNEL f1 *****
NUC1              1H
P1                17.00 us
PL1              1.00 dB
SFO1             400.1926012 MH
```

|                            |                 |
|----------------------------|-----------------|
| P2 - Processing parameters |                 |
| SI                         | 32768           |
| SF                         | 400.1900095 MHz |
| MDW                        | EM              |
| SSB                        | 0               |
| LB                         | 0.50 Hz         |
| CB                         | 0               |
| PC                         | 1.00            |

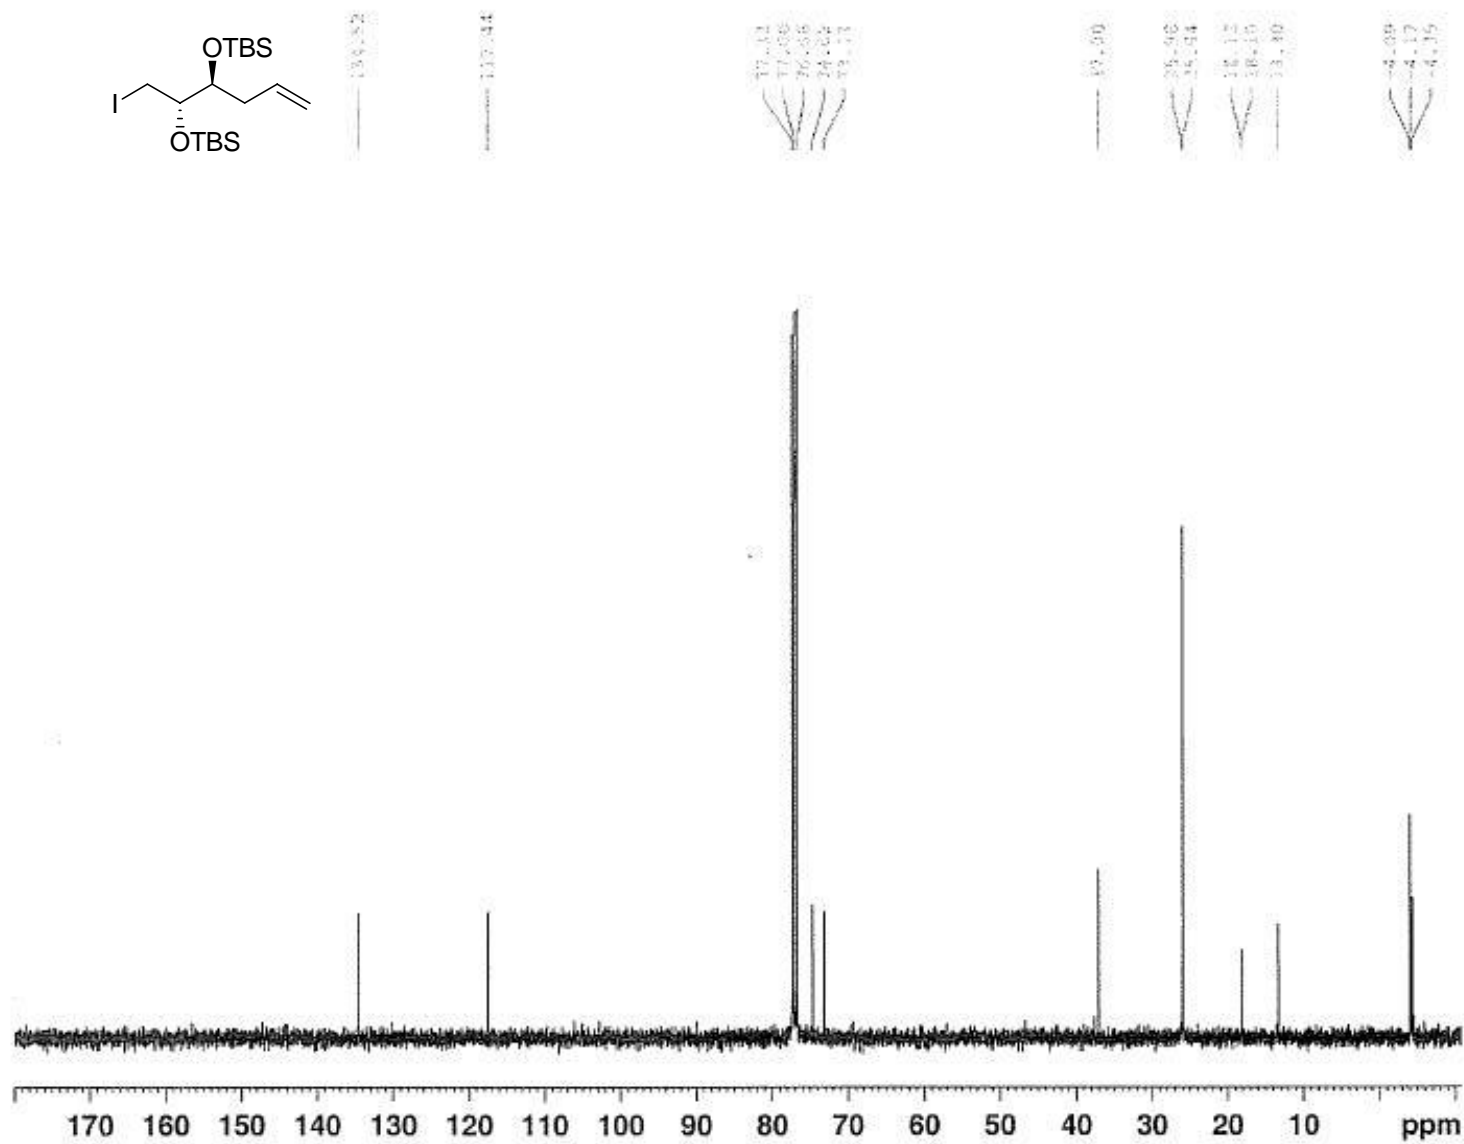

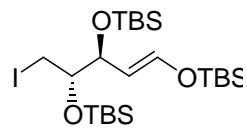

24

No title

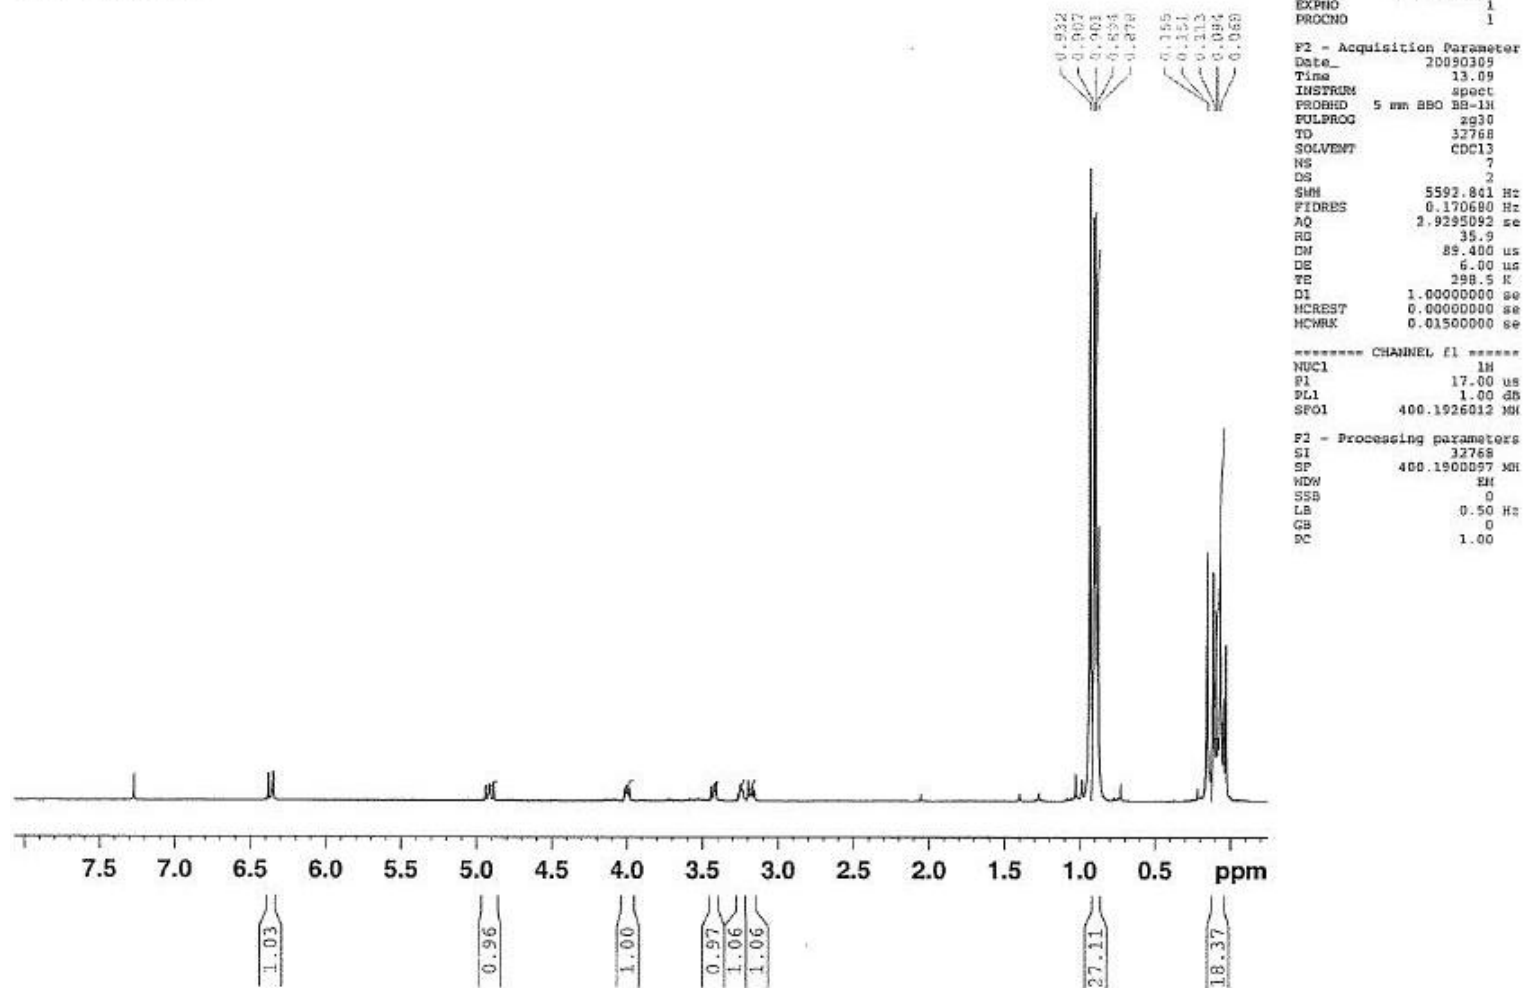

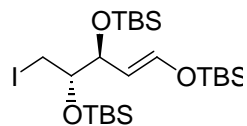

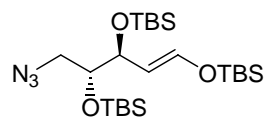

25

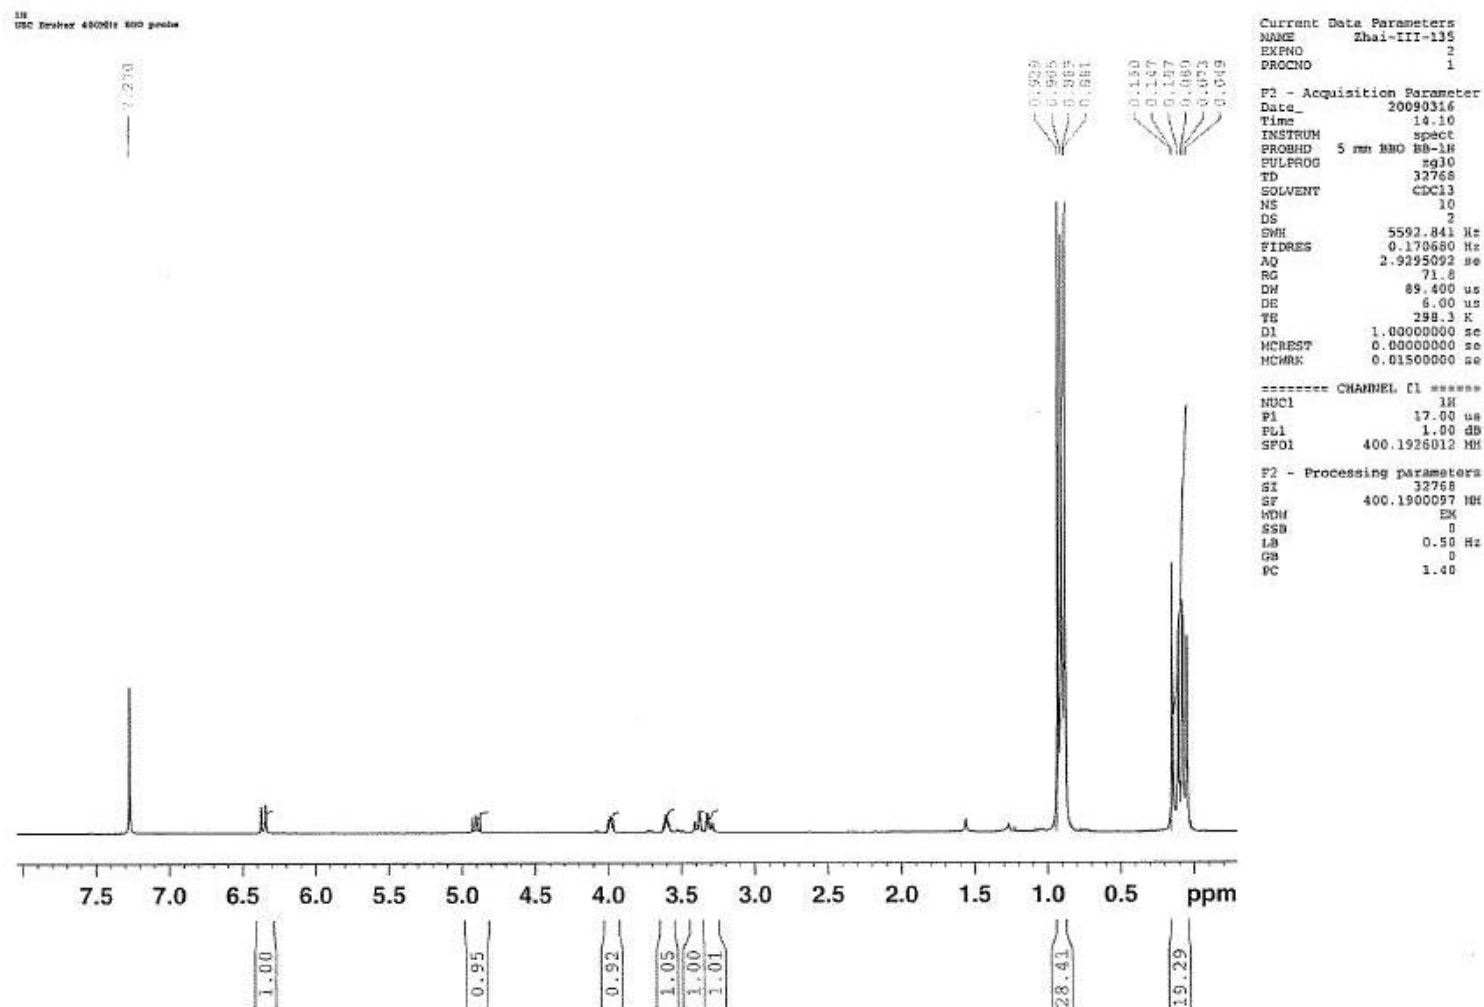

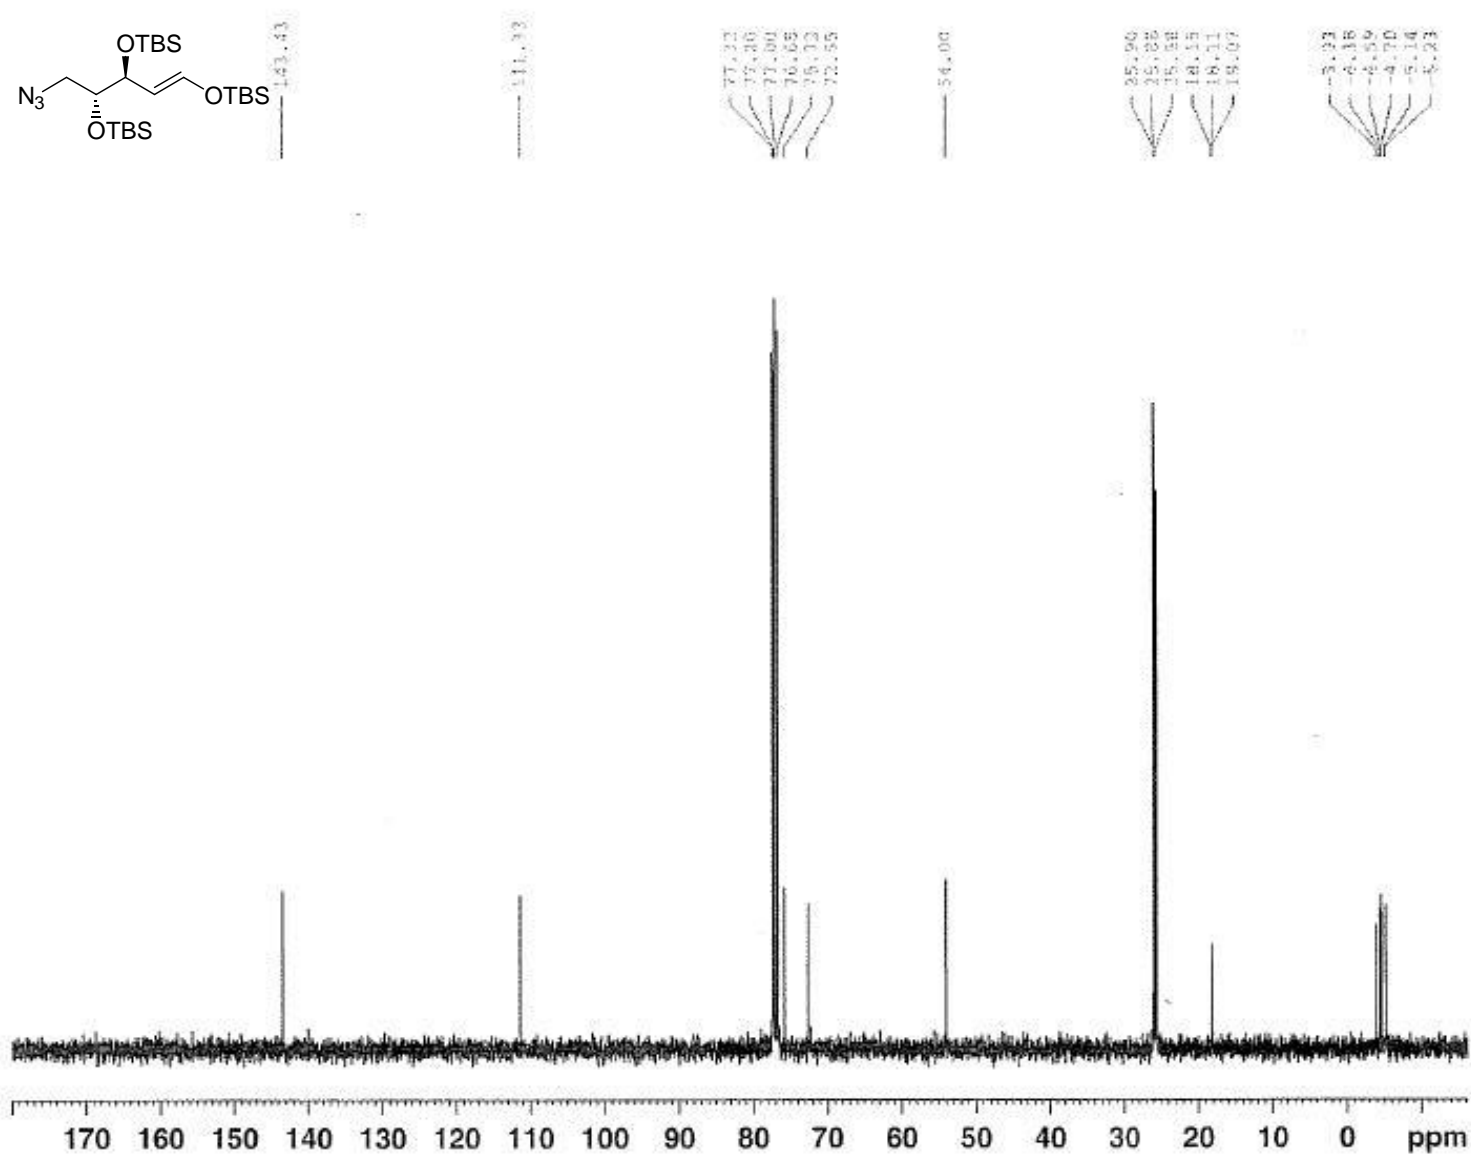

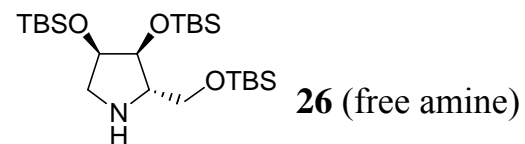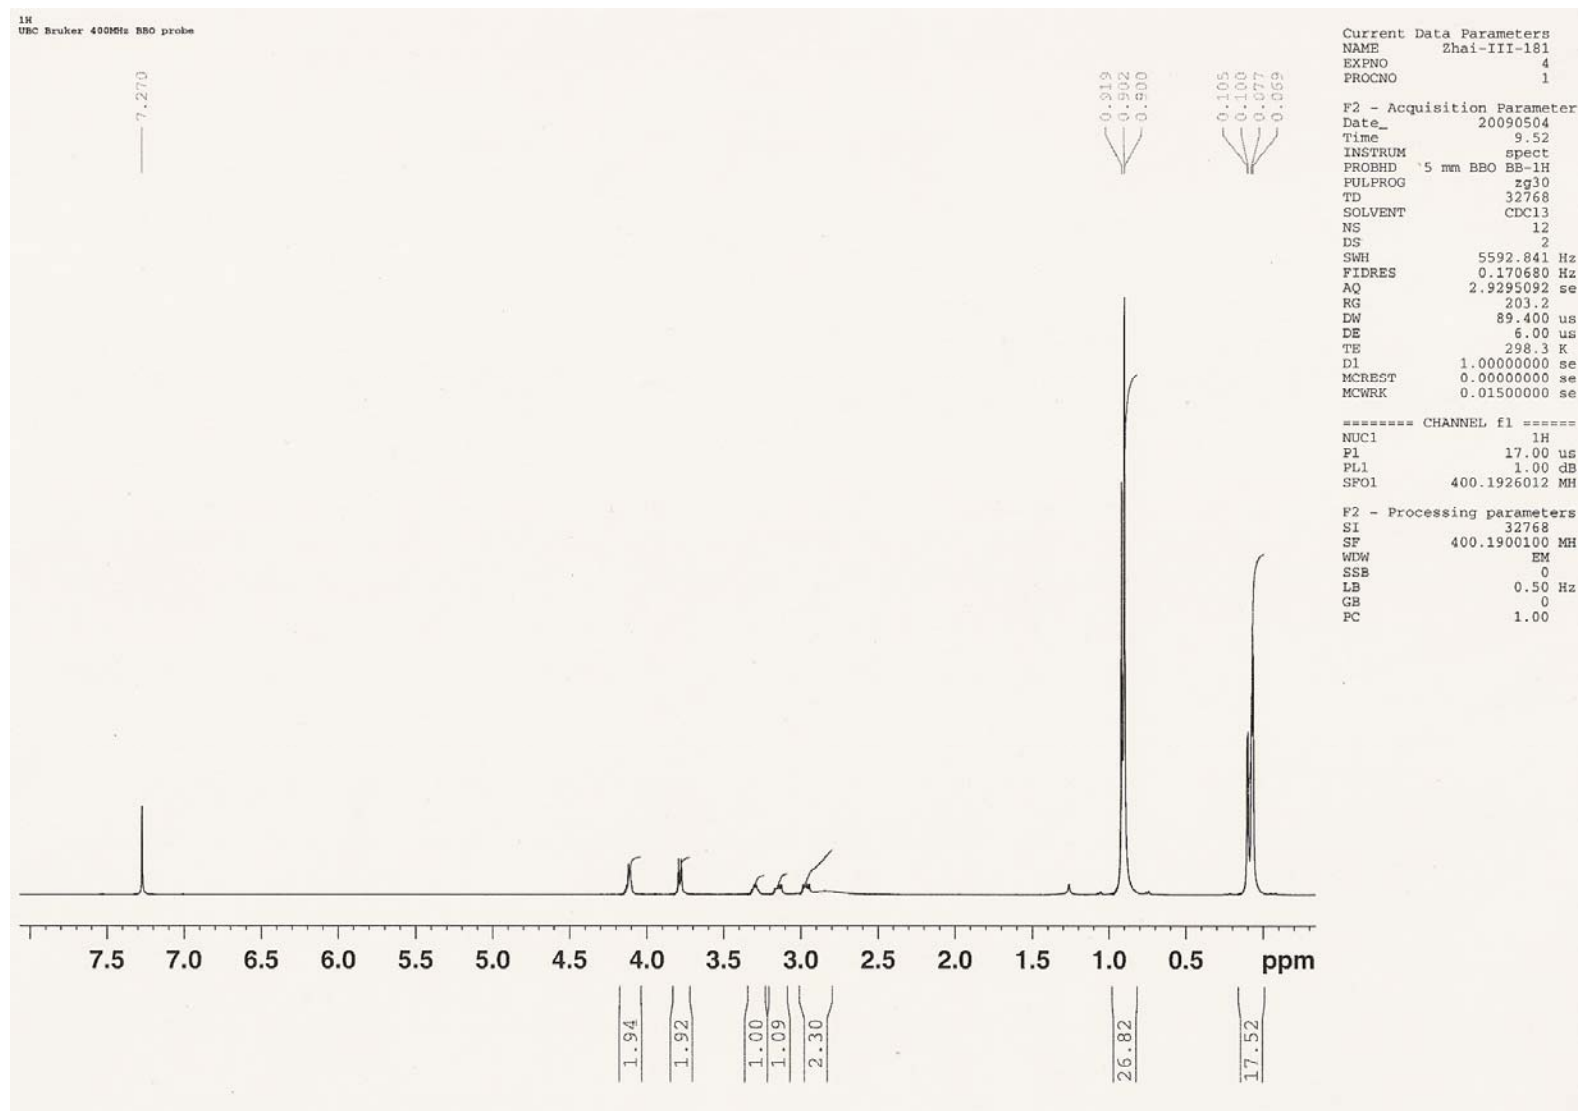

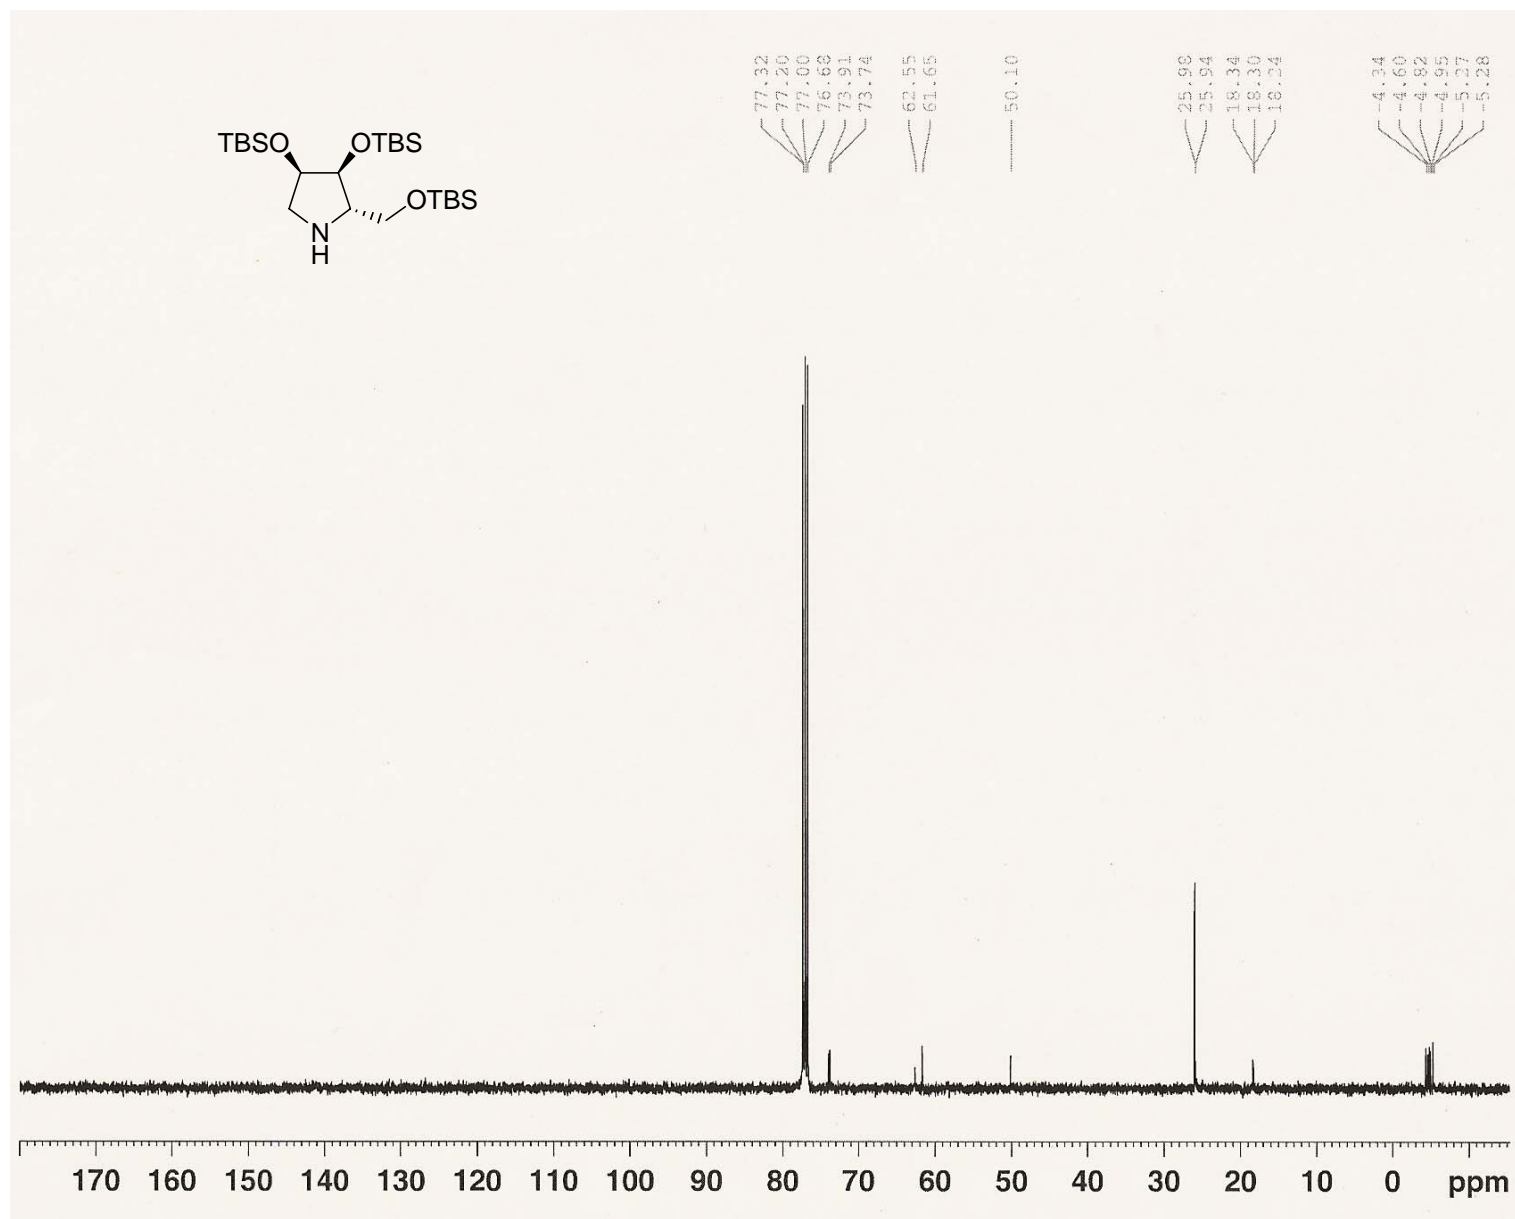

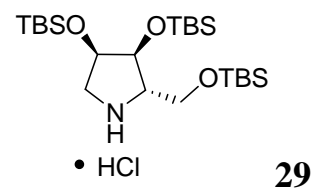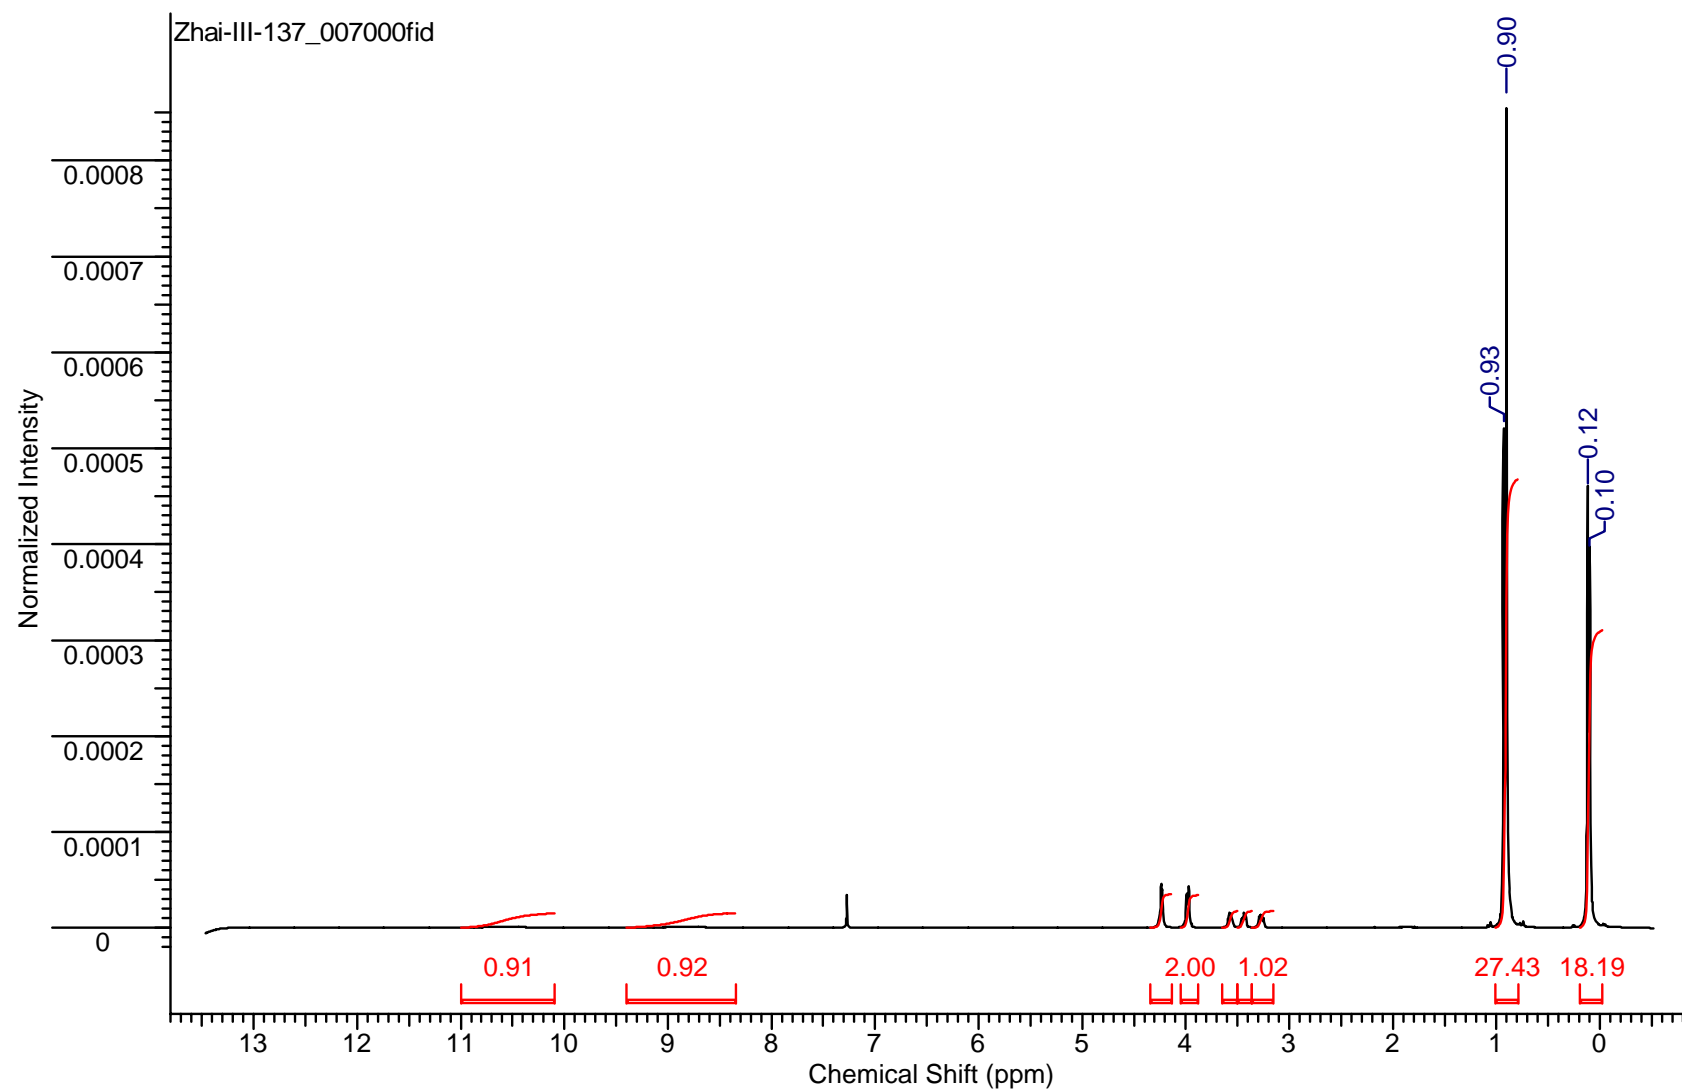

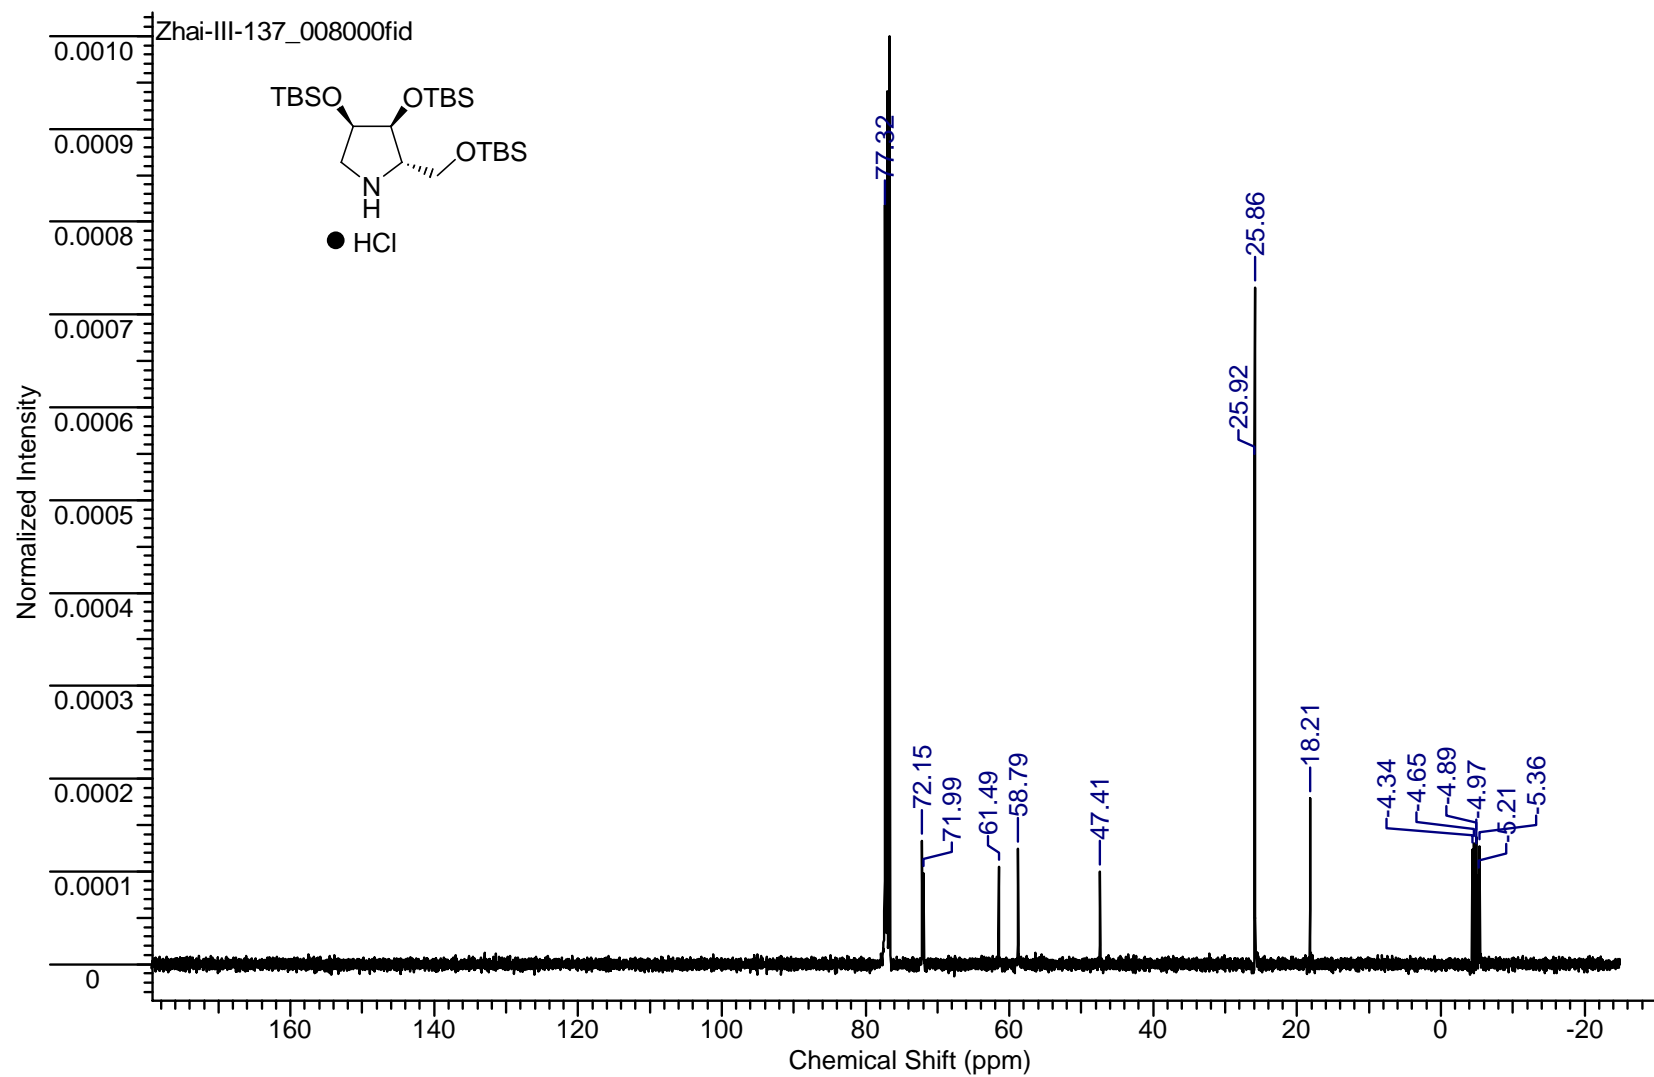

Supplement: b914757h.pdf [file b914757h.pdf]
